# Supplementary material for: Physician Mental Workload Scale in China: Development and Psychometric Evaluation
Source: PubMed Central journal article supplement — BMJ Open. 2019 Oct 16;9(10):e030137. doi: 10.1136/bmjopen-2019-030137 (PMC6797283; doi:10.1136/bmjopen-2019-030137), 2019-10-16
Supplement: bmjopen-2019-030137.draft_revisions.pdf [file bmjopen-2019-030137.draft_revisions.pdf]

# BMJ Open

BMJ Open is committed to open peer review. As part of this commitment we make the peer review history of every article we publish publicly available.

When an article is published we post the peer reviewers' comments and the authors' responses online. We also post the versions of the paper that were used during peer review. These are the versions that the peer review comments apply to.

The versions of the paper that follow are the versions that were submitted during the peer review process. They are not the versions of record or the final published versions. They should not be cited or distributed as the published version of this manuscript.

BMJ Open is an open access journal and the full, final, typeset and author-corrected version of record of the manuscript is available on our site with no access controls, subscription charges or pay-per-view fees (<http://bmjopen.bmj.com>).

If you have any questions on BMJ Open's open peer review process please email [info.bmjopen@bmj.com](mailto:info.bmjopen@bmj.com)

# BMJ Open

## Physician Mental Workload Scale in China: Development and Psychometric Evaluation

|                               |                                                                                                                                                                                                                                                                                                                                                                                                                                                                                                                                                                                                                                                                                                                                                                                                                                                                                                                                       |
|-------------------------------|---------------------------------------------------------------------------------------------------------------------------------------------------------------------------------------------------------------------------------------------------------------------------------------------------------------------------------------------------------------------------------------------------------------------------------------------------------------------------------------------------------------------------------------------------------------------------------------------------------------------------------------------------------------------------------------------------------------------------------------------------------------------------------------------------------------------------------------------------------------------------------------------------------------------------------------|
| Journal:                      | <i>BMJ Open</i>                                                                                                                                                                                                                                                                                                                                                                                                                                                                                                                                                                                                                                                                                                                                                                                                                                                                                                                       |
| Manuscript ID                 | bmjopen-2019-030137                                                                                                                                                                                                                                                                                                                                                                                                                                                                                                                                                                                                                                                                                                                                                                                                                                                                                                                   |
| Article Type:                 | Research                                                                                                                                                                                                                                                                                                                                                                                                                                                                                                                                                                                                                                                                                                                                                                                                                                                                                                                              |
| Date Submitted by the Author: | 28-Feb-2019                                                                                                                                                                                                                                                                                                                                                                                                                                                                                                                                                                                                                                                                                                                                                                                                                                                                                                                           |
| Complete List of Authors:     | <p>Lu, Chuntao; Huazhong University of Science and Technology Tongji Medical College, School of Medicine and Health Management</p> <p>Hu, Yinhan; Huazhong University of Science and Technology Tongji Medical College, School of Medicine and Health Management</p> <p>Fu, Qiang; Saint Louis University, College for Public Health and Social Justice, Department of Epidemiology and Biostatistics</p> <p>Governor, Samuel ; Saint Louis University, College for Public Health and Social Justice, Department of Epidemiology and Biostatistics</p> <p>Wang, Liuming; Huazhong University of Science and Technology Tongji Medical College, Tongji Hospital</p> <p>Deng, Lu; Huazhong University of Science and Technology Tongji Medical College, School of Medicine and Health Management</p> <p>Xie, Jinzhu; Huazhong University of Science and Technology Tongji Medical College, School of Medicine and Health Management</p> |
| Keywords:                     | Physician, MENTAL HEALTH, Workload, Survey and Questionnaires, Hospitals, Public                                                                                                                                                                                                                                                                                                                                                                                                                                                                                                                                                                                                                                                                                                                                                                                                                                                      |
|                               |                                                                                                                                                                                                                                                                                                                                                                                                                                                                                                                                                                                                                                                                                                                                                                                                                                                                                                                                       |

SCHOLARONE™  
Manuscripts

**Title page**

Manuscript title:

Physician Mental Workload Scale in China: Development and Psychometric Evaluation

Corresponding author:

Yinhuan Hu

Address: No.13 Hangkong Rd., Wuhan, Hubei 430030, P.R. China

Email: [hyh288@hotmail.com](mailto:hyh288@hotmail.com)

Telephone number: 13554285879

Co-author:

**Chuntao Lu:** School of Medicine and Health Management, Tongji Medical College, Huazhong University of Science and Technology, No.13 Hangkong Rd., Wuhan, Hubei 430030, P.R. China

**Yinhuan Hu:** School of Medicine and Health Management, Tongji Medical College, Huazhong University of Science and Technology, No.13 Hangkong Rd., Wuhan, Hubei 430030, P.R. China

**Qiang Fu:** Department of Epidemiology and Biostatistics, College for Public Health and Social Justice, Saint Louis University, Missouri, MO, United States

**Samuel Governor:** Department of Epidemiology and Biostatistics, College for Public Health and Social Justice, Saint Louis University, Missouri, MO, United States

**Liuming Wang:** Tongji Hospital, Tongji Medical College of Huazhong University of Science and Technology, No.1095 Jiefang Rd., Wuhan, Hubei 430030, P.R. China

1  
2  
3  
4 **Lu Deng** : School of Medicine and Health Management, Tongji Medical College,  
5  
6 Huazhong University of Science and Technology, No.13 Hangkong Rd.,Wuhan, Hubei  
7  
8  
9 430030, P.R. China  
10

11 **Jinzhui Xie**: The Third People's Hospital of Hubei Province, No.26 Zhongshan Rd.,  
12  
13  
14 Wuhan, Hubei 430030, P.R. China.  
15  
16

17  
18  
19  
20  
21  
22  
23  
24  
25  
26  
27  
28  
29  
30  
31  
32  
33  
34  
35  
36  
37  
38  
39  
40  
41  
42  
43  
44  
45  
46  
47  
48  
49  
50  
51  
52  
53  
54  
55  
56  
57  
58  
59  
60

For peer review only

## Physician Mental Workload Scale in China: Development and Psychometric Evaluation

### Abstract

**Objective:** The purpose of our study is to develop and perform reliability and validity assessments of mental workload scale for physicians in China.

**Design:** Three phases, involving 385 physicians from different-level of comprehensive public hospitals in China, were conducted in this research to develop this instrument. In the first phase, an initial item pool was developed through systematic literature review. The second phase consisted of two rounds of Delphi expert consultations and a pilot survey. The third phase tested psychometric properties of the instrument, including reliability and validity.

**Setting:** Public hospitals in China

**Participants:** 385 physicians from different-level of comprehensive public hospitals in China took part in this survey in 2018.

**Primary and secondary outcome measures:** Cronbach's alpha was used to test the reliability of the scale. Content validity index, correlation coefficient analysis, exploratory factor analysis, and confirmatory factor analysis were conducted to test validity of the scale.

**Results:** Six dimensions (mental demand, physical demand, temporal demand, perceived risk, frustration level and performance) and twelve items were identified in the instrument. For reliability, Cronbach's  $\alpha$  for the whole scale was 0.81. For validity, the corrected item-content validity index of each item ranged from 0.85-1 and correlation coefficients between dimensions and total scores had a range of 0.37-0.72.

1  
2  
3  
4 The results of confirmatory factor analysis showed that the goodness of fit of the scale  
5  
6 was reasonable. Thus, the scale had good reliability and validity.  
7  
8

9 **Conclusion:** The instrument showed acceptable psychometric properties and can be a  
10  
11 useful instrument for diagnosing mental workload of physicians.  
12  
13

14 **Keywords:** Physician; Mental Health; Workload; Survey and Questionnaires; Hospitals,  
15  
16 Public  
17  
18  
19  
20  
21

## 22 **Article Summary**

### 23 **Strengths and limitations of this study**

24  
25 This is the first study to develop a measurement about physician mental workload  
26  
27 from subjective perspective in China.  
28  
29

30 The findings of this study have good validity and reliability.  
31  
32

33 There is potential reporting bias in the self-reported measurements of the workload  
34  
35 among physicians.  
36  
37

38 There was no assessment of re-test reliability because of web-based survey method.  
39  
40

41 There existed a selection bias due to all respondents voluntarily rather than randomly  
42  
43 took part in the survey.  
44  
45  
46  
47  
48  
49  
50  
51  
52  
53  
54  
55  
56  
57  
58  
59  
60

## Introduction

Internationally, there has been a focus on the workload that physicians have often to face and on the physical and mental health[1]. Physician health is highly associated with workload[2]. Excessive workload impacts physician's health[3,4]and increases the risk of work-related musculoskeletal disorders (MSDs)[5,6]. Exposure to workload has been shown to be related to adverse effects in medical errors[7] and adverse incidents[8]. Physician workload could be a negatively contributing factor to patients' perceived quality of care[9], and affects patient satisfaction[10] and safety[11,12]. It is possible that these stressors have reached a point where they pose a serious policy issue for the entire healthcare system[13]. Thus, unreasonable and overwhelming workload has adverse effects to physicians, patients and healthcare organizations[14].

Workload is thought to be multidimensional and multifaceted[15]. One aspect of workload includes the subjective psychological experiences of the human operator[16]. Mental workload has emerged as one of the most important occupational risk factors as well. Heavily mental workload can lead to serious health problems for workers (anxiety, burnout, cardiovascular diseases, digestive problems, etc.)[17], so as well to physicians, excessive mental workload can lead to inferior quality of care[18]. Currently, The European Pact for Mental Health and Welfare[19] has conducted mental workload assessments to promote physical and mental wellbeing.

Mental workload can be influenced by numerous factors that make a definitive

1  
2  
3  
4 measurement difficult[20]. Different methods have been proposed to assess mental  
5  
6 workload. Previous research has established a brief instrument with six items to  
7  
8 measure physician mental workload[21]. The most widely used instrument to  
9  
10 measure mental workload is NASA-Task Load Index (NASA-TLX) scale[22] which has  
11  
12 proven to be a sensitive, valid, and reliable instrument[23] and can be used in human  
13  
14 factors research[24]. The existing body of research on NASA-TLX suggests that it could  
15  
16 be used to measure nurse workload[25-27]. In the same vein, the Subjective Workload  
17  
18 Assessment Technique (SWAT) is a subjective rating technique with three dimensions  
19  
20 of time load, mental effort load, and psychological stress load, which is used to assess  
21  
22 mental workload as well[28]. It has been successfully applied in the mental workload  
23  
24 assessment of several aircraft multitask conditions, such as assessing the mental  
25  
26 workload of different systems of air defense[23]. Together these studies provide  
27  
28 important insights into workload measurement in health care management. However,  
29  
30 there is no specific instrument, to our knowledge, has been explored in physician  
31  
32 mental workload in China.  
33  
34  
35  
36  
37  
38  
39  
40  
41  
42

43 Physicians, some of the major providers of health services, taking more and more  
44  
45 responsibilities for patient care in Chinese health care management, have heavier  
46  
47 workload, worse physical health, more mental strain and more intense relationships  
48  
49 with patients[29]. Data from several studies suggest that most physicians' work more  
50  
51 than 10 hours in a day[30] to manage outpatients and inpatients, on average, a  
52  
53 physician in a tertiary hospital is responsible for 8.10 outpatients and 2.70 beds per  
54  
55 day[29]. However, they even have been abused, injured, and in extreme cases,  
56  
57  
58  
59  
60



1  
2  
3  
4 murdered by patients or their relatives in hospitals across China[31], which resulted  
5  
6 in extremely mental workload. Establishing the workload measurement system for  
7  
8 medical personnel has been fitted into Chinese Patient Safety Goals by Chinese  
9  
10 Hospital Association[32].  
11  
12

13  
14 However, existing research about workload measurement instruments are  
15  
16 concentrated on work time and objective workload in China, whereas the mental  
17  
18 workload which is an indispensable problem has less relevant instrument in China. The  
19  
20 purpose of this paper is to develop a scientific mental workload instrument, which can  
21  
22 be used to measure or assess the actual mental workload of physicians in China.  
23  
24  
25  
26  
27  
28  
29  
30

## 31 **Methods**

### 32 **Study design**

33  
34  
35 The instrument was developed in three phases. In the first phase, an initial item  
36  
37 pool was developed by integrating previous studies through systematic literature  
38  
39 review. The second phase consisted of two rounds of Delphi expert consultations and  
40  
41 a pilot survey in 2017. The third phase was testing the psychometric properties of the  
42  
43 instrument, including its reliability and validity, through a survey conducted in 2018 in  
44  
45 comprehensive public hospitals in China.  
46  
47  
48  
49  
50  
51  
52

### 53 **Framework and items of generation and selection**

54  
55  
56  
57  
58 Based on the framework of NASA-TLX and SWAT, we combined the status quo of  
59  
60

1  
2  
3  
4 Chinese physicians' workload to determine the item pool. Six dimensions and fifteen  
5  
6 items were sent to 20 experts for consultation. After a two-round consultation, it was  
7  
8 suggested that we deleted four items, added a new item, and revised the description  
9  
10 of all the items. Finally, the pre-scale consisted of six dimensions (physical demand,  
11  
12 mental demand, temporal demand, effort, frustration level, and performance) and  
13  
14 twelve items with an evaluation from 0 to 100.  
15  
16  
17

18  
19 In the pre-survey analysis, a sample of 80 physicians was surveyed with a web-  
20  
21 based pre-scale during November and December 2017. Items were refined based on  
22  
23 the following indexes or methods: critical ratio (CR), coefficient of variation (CV),  
24  
25 correlation analysis[33], Cronbach's  $\alpha$ [34], exploratory factor analysis (EFA)[35].  
26  
27  
28

29  
30 If an item was eliminated by any of the above methods, then the item was  
31  
32 deleted or revised. Final scale consisted of six dimensions (mental demand, physical  
33  
34 demand, temporal demand, perceived risk, frustration level, and performance) and  
35  
36 twelve items (Table 1).  
37  
38  
39

#### 40 41 **Data collection for testing validity and reliability of the scale** 42

43  
44  
45 To test the validity and reliability of the developed scale, the samples size was 5-  
46  
47 10 times the size of the items, were considered suitable[36]. Data was collected from  
48  
49 the tertiary hospitals (valid sample size: 130), secondary hospitals (valid sample size:  
50  
51 124) and first-level hospitals (valid sample size: 131) from February 2018 to March  
52  
53 2018.  
54  
55  
56

57  
58 The scale included three parts. The first part of the scale was the principal twelve  
59  
60

1  
2  
3  
4 items. The second part was used to collect the weights of each dimension. Every two  
5  
6 dimensions formed a pair, and the respondents selected which of the two dimensions  
7  
8 in a pair they considered to have contributed more to their workload. There were  
9  
10 fifteen pairs the respondents needed to select from, and the weights of each  
11  
12 dimension was equal to the number of times that dimension was selected divided by  
13  
14  
15  
16  
17 fifteen. The third part was the individual information about the physicians.

18  
19 Items were scored from 0 to 100. Responses to the items are displayed in Table

20  
21  
22 1. The average scores of all items for a corresponding dimension were multiplied by  
23  
24 the dimension weight to produce the dimension scores. The total scores were the sum  
25  
26  
27 of all dimension scores.  
28  
29

30 Table 1 Dimensions and items of physician mental workload scale

| Dimensions and items                                                                                                                                                    | Endpoints (0-100)                                  |
|-------------------------------------------------------------------------------------------------------------------------------------------------------------------------|----------------------------------------------------|
| <b>Mental demand</b>                                                                                                                                                    |                                                    |
| A1 How much cognitive activity (e.g. sensation, perception, remembering, thinking, calculating, attention etc.) was required during your medical work?                  | Little (lighter workload) /much (heavier workload) |
| A2 How much emotion and feeling was required (e.g. empathy, sympathy, enthusiasm, negative emotion restraining etc.) during your medical work?                          | Little (lighter workload) /much (heavier workload) |
| A3 How hard did you have to work to overcome difficulties in accomplishing your medical work?                                                                           | Low (lighter workload) /high (heavier workload)    |
| <b>Physical demand</b>                                                                                                                                                  |                                                    |
| B1 How much physical activity was required (e.g. standing, sedentary, controlling, repetitive action etc.) in your medical work?                                        | Little (lighter workload) /much (heavier workload) |
| B2 How intensive or precise was the physical activity during your medical work? (Was the work restful or laborious? Was your muscle relaxed or tense?)                  | Low (lighter workload) /high (heavier workload)    |
| <b>Temporal demand</b>                                                                                                                                                  |                                                    |
| C1 How much time pressure did you feel due to the ratio of required time to available time in your medical work (Was the pace slow and leisurely or rapid and frantic)? | Little (lighter workload) /much (heavier workload) |
| C2 How frequent did you have to complete multiple tasks at                                                                                                              | Low (lighter workload) /high (heavier workload)    |

1  
2  
3 the same time (work overlap) in your medical work?

4 **Perceived risk**

5  
6 D1 How much risk did you perceive (e.g. professional infection, Little (lighter workload) /much (heavier workload)  
7 medical dispute , uncertainty of medical treatment etc.) in  
8 your medical work?  
9

10 **Frustration level**

11 E1 How depressed or frustrated did you feel in your medical Low (lighter workload) /high (heavier workload)  
12 work?  
13

14 E2 How anxious or irritated did you feel in your medical work? Low (lighter workload) /high (heavier workload)  
15

16 **Performance**

17 F1 How successful do you think you were in accomplishing the Low (heavier workload) /high (lighter workload)  
18 goals in your medical work?  
19

20 F2 How satisfied were you with the outcome in your medical Unsatisfactory(heavier workload) /satisfactory(light  
21 work?  
22

---

23  
24  
25 **Statistical analysis**

26  
27  
28  
29 Descriptive statistics were used to show the characteristics of the samples. For  
30  
31 the reliability of the scale, Cronbach's alpha was used to assess the internal  
32  
33 consistency of each instrument component. Values of 0.70 or greater for Cronbach's  
34  
35 alpha were considered acceptable[34].  
36  
37  
38

39  
40 Content validity index (CVI) of each item was calculated to assess the accuracy of  
41  
42 the scale using the scores of 1-4. Experts were invited to assess the items with a scale  
43  
44 of 1 representing the item not relevant to corresponding dimension and 4  
45  
46 representing the item closely relevant to corresponding dimension. Corrected item-  
47  
48 content validity index (I-CVI) and average scale-content validity index (S-CVI/Ave)  
49  
50 were calculated. Corrected I-CVI of 0.78 or greater and S-CVI/Ave of 0.90 or greater  
51  
52 were considered acceptable[37].  
53  
54  
55  
56  
57

58 The test of construct validity was tested by correlation coefficient method,  
59  
60

1  
2  
3  
4 Exploratory Factor Analysis and Confirmatory Factor Analysis. Items whose values for  
5  
6 item-total correlation and dimension-total correlation below 0.40 were revised or  
7  
8 removed from the scale. A Bartlett's test of sphericity scores lower than 0.05 and a  
9  
10 Kaiser-Meyer-Olkin (KMO) measure of sampling adequacy higher than 0.70 and closer  
11  
12 to 1 were considered appropriate for factor analysis[38]. Exploratory Factor Analysis  
13  
14 and Confirmatory Factor Analysis was used to further explore and confirm the  
15  
16 structure of the scale.  
17  
18  
19  
20  
21

22 For the Confirmatory Factor Analysis, the criterion of model fit indices were listed  
23  
24 as follows:  $\chi^2/df < 3$ ; root mean square error of approximation (RMSEA)  $< 0.05$ ; root  
25  
26 of mean square residual (RMR) $< 0.05$ ; goodness of fit (GFI)  $> 0.90$ , comparative fit index  
27  
28 (CFI) $> 0.90$ , Tucker-Lewis index (TLI) $> 0.90$ [39]. Statistical analyses were performed  
29  
30 with SPSS V. 21 (IBM Corp., Armonk, NY, USA) and AMOS V.17 (IBM Corp., Armonk,  
31  
32 NY, USA).  
33  
34  
35  
36  
37  
38

### 39 **Participants and public involvement**

40  
41  
42 We used a reliable and widely web-based survey ([www.wjx.cn](http://www.wjx.cn)) in the form of  
43  
44 quick-response code to survey physicians through sending the code to physician  
45  
46 communication groups of each hospital. Participants were voluntarily to take part in  
47  
48 this survey, before participating in the study, informed consent was provided to them.  
49  
50  
51  
52  
53  
54  
55  
56  
57  
58  
59  
60

## Results

### Sample characteristics

396 questionnaires were received and 11 questionnaires were excluded due to incomplete demographic information. The response rate was 97.2% (385/396). There were no issues of floor or ceiling effects as questions to every item were responded as required in the form of quick-response code. Characteristics of the participants are presented in Table 2.

Table 2 Respondents' characteristic of samples

| Variable                                         | Valid sample | Percentage (%) |
|--------------------------------------------------|--------------|----------------|
| <b>Gender</b>                                    |              |                |
| Male                                             | 200          | 51.95          |
| Female                                           | 185          | 48.05          |
| <b>Age</b>                                       |              |                |
| <45                                              | 258          | 67.01          |
| 45-55                                            | 121          | 31.43          |
| >55                                              | 6            | 1.56           |
| <b>Marriage status</b>                           |              |                |
| Single                                           | 47           | 12.21          |
| Married                                          | 329          | 85.45          |
| Divorced/widowed                                 | 9            | 2.34           |
| <b>Educational level</b>                         |              |                |
| PhD degree                                       | 36           | 9.35           |
| Master degree                                    | 48           | 12.47          |
| Undergraduate                                    | 184          | 47.79          |
| Junior college and below                         | 117          | 30.39          |
| <b>Professional title</b>                        |              |                |
| Senior                                           | 83           | 21.56          |
| Middle                                           | 146          | 37.92          |
| Junior                                           | 156          | 40.52          |
| <b>Work years in his/her institutions (year)</b> |              |                |
| 1-5                                              | 122          | 31.69          |
| 6-10                                             | 91           | 23.64          |
| 11-15                                            | 58           | 15.06          |

| Variable                                   | Valid sample | Percentage (%) |
|--------------------------------------------|--------------|----------------|
| >16                                        | 114          | 29.61          |
| <b>Hospital level</b>                      |              |                |
| Tertiary hospitals                         | 130          | 33.77          |
| Secondary hospitals                        | 124          | 32.21          |
| First-level hospitals                      | 131          | 34.02          |
| <b>Work hours per week</b>                 |              |                |
| <=40                                       | 73           | 18.96          |
| 41-60                                      | 152          | 39.48          |
| >60                                        | 160          | 41.56          |
| <b>Number of daily service outpatients</b> |              |                |
| <20                                        | 135          | 35.06          |
| 20-50                                      | 171          | 44.42          |
| >50                                        | 79           | 20.52          |
| <b>Self-rated health status</b>            |              |                |
| Poor                                       | 65           | 16.89          |
| Fair                                       | 242          | 62.86          |
| Good                                       | 78           | 20.25          |

### Reliability of physician mental workload scale

Each of the six components demonstrated at least satisfactory internal consistency higher than 0.70, with Cronbach's  $\alpha$  in the range of 0.70-0.90. Cronbach's  $\alpha$  for the whole scale was up to 0.81, greater than 0.80, indicating that the scale has a good reliability.

### Validity of physician mental workload scale

The corrected I-CVI of each item ranged from 0.85-1 (Table 3), which is higher than 0.78. The CVI/Ave was 0.96, which is higher than 0.90. All of these showed a good content validity of the scale.

The correlation matrix between items and total scores was inspected to confirm the convergent validity, which was indicated by reasonable coefficients of 0.40 and

above, except for F1 and F2 (Table 3). Calculated correlation coefficients between dimensions and total scores had a range of 0.37-0.72, which was an additional index that showed that dimensions and total scores have a good convergent validity. Also, the correlation coefficients among the dimensions were lower than the correlation coefficients between the dimension-total scores, which indicated that the scale has a good discriminant validity (Table 4).

Table 3 Content validity and correlation coefficient of item-total scores of the scale

| Items                          | Corrected I-CVI | Item-total correlations |
|--------------------------------|-----------------|-------------------------|
| Cognitive activity             | 1               | 0.57                    |
| Emotion and feeling            | 0.85            | 0.57                    |
| Overcoming difficulties        | 0.85            | 0.59                    |
| Physical activity              | 1               | 0.57                    |
| Intensity of physical activity | 1               | 0.65                    |
| Time pressure                  | 1               | 0.69                    |
| Multiple task                  | 0.85            | 0.69                    |
| Risk                           | 1               | 0.64                    |
| Depressed or frustrated        | 1               | 0.75                    |
| Anxious or irritated           | 1               | 0.75                    |
| Successful                     | 1               | 0.33*                   |
| Satisfied                      | 1               | 0.31*                   |

\*item-total scores were below than 0.4

Table 4 Correlation coefficient matrix between dimensions and total scores of the scale

| Dimensions      | Mental demand | Physical demand | Temporal demand | Perceived risk | Frustration Level | Performance | Total scores |
|-----------------|---------------|-----------------|-----------------|----------------|-------------------|-------------|--------------|
| Mental demand   | 1             |                 |                 |                |                   |             |              |
| Physical demand | 0.43          | 1               |                 |                |                   |             |              |
| Temporal demand | 0.52          | 0.47            | 1               |                |                   |             |              |
| Perceived risk  | 0.46          | 0.38            | 0.44            | 1              |                   |             |              |



|                   |      |      |      |      |      |      |   |
|-------------------|------|------|------|------|------|------|---|
| Frustration level | 0.40 | 0.36 | 0.54 | 0.51 | 1    |      |   |
| Performance       | 0.09 | 0.05 | 0.01 | 0.05 | 0.13 | 1    |   |
| Total scores      | 0.61 | 0.52 | 0.68 | 0.68 | 0.72 | 0.37 | 1 |

### Exploratory factor analysis of physician mental workload scale

The KMO sample adequacy measurement was 0.81, which was higher than the recommended value of 0.70, and the Bartlett's test of sphericity with Chi square value 1950.70 and  $p < 0.000$ . Thus, the data were suitable for factor analysis. Considering experts' suggestion, we select 6 principal components and the six-dimensional model explained 81.88% of total variance (Table 5).

The factor "mental demand" was developed from 3 items that asked for feeling or memory requirement, emotional requirement, and the effort input to overcome difficulties, with the factor loading in the range of 0.74-0.81. The factor "physical demand" consisted of 2 items that related to strength requirement and the intensity of work time with a factor loading in the range of 0.84-0.90. The factor "temporal demand" constituted 2 items that asked about the ratio of required time to available time and frequency of completing multiple tasks, with the factor loading in the range of 0.77-0.82.

The factor "perceived risk" included only 1 item that explained the perception of risk in conducting tasks (such as medical dispute and risk of being infectious) with a factor loading of 0.84. The factor "frustration level" consisted of 2 items that asked

about anxiety and level of depression or frustration, and the factor loading was in the range of 0.86-0.88. There were 2 items in the “performance demand” factor, which related to the sense of achievement and job satisfaction regarding work outcome, with the factor loading in the range of 0.85-0.90.

Table 5 Factor loadings for the rotated component matrix: varimax rotated components

| Items | Components |      |      |      |      |      |
|-------|------------|------|------|------|------|------|
|       | 1          | 2    | 3    | 4    | 5    | 6    |
| A2    | 0.81       |      |      |      |      |      |
| A1    | 0.76       |      |      |      |      |      |
| A3    | 0.74       |      |      |      |      |      |
| E1    |            | 0.88 |      |      |      |      |
| E2    |            | 0.86 |      |      |      |      |
| B1    |            |      | 0.90 |      |      |      |
| B2    |            |      | 0.84 |      |      |      |
| C1    |            |      |      | 0.82 |      |      |
| C2    |            |      |      | 0.77 |      |      |
| F1    |            |      |      |      | 0.90 |      |
| F2    |            |      |      |      | 0.85 |      |
| D1    |            |      |      |      |      | 0.84 |

### Confirmatory factor analysis of physician workload scale

The six-factor model obtained after Exploratory Factor Analysis was tested by Confirmatory Factor Analysis using maximum likelihood estimation method. The goodness-of-fit model was listed as follows:  $\chi^2/df=1.84$ , RMR= 0.04, and GFI=0.97, CFI=0.98, TLI=0.97, RMSEA=0.05. Referring to the criterion listed above, the model was a good fit for the data.

## Discussion

The purpose of this study is to develop and explore the validity and reliability of mental workload scale for physicians. According to the results of the tests, the scale is reliable and valid, hence, it is considered as an effective instrument for assessing physician mental workload in Chinese comprehensive public hospitals. Results show a six-dimensional model which includes aspects related to mental demand, physical demand, temporal demand, perceived risk, frustration level and performance. Perceived risk and temporal demand are especially distinctive for Chinese physician mental workload.

Perceived risk, which is a different dimension and not included in framework of NASA-TLX and SWAT, is highly associated with physician mental workload in China. Medical practice is a special but a high-risk behavior because physicians do not only save and heal people, but also they put themselves at a risk of being infectious. Also in China, there tends to be an estranged relationship between physicians and patients which puts physicians at a dangerous risk of being assaulted in their line of work[40]. For instance, in recent years, many doctors have been assaulted, seriously injured and even murdered by patients or visitors in China. According to the statistics, 96% of medical staff have been abused or injured in 2012[41]. Moreover, the reports of these incidents by mass media have further exacerbated the conflict between doctors and patients. The physician-patient relationship is becoming more and more fragile and has reached an unprecedented poor level in China[42]. Without exaggeration, some physicians even wear helmet in the hospitals in Guangdong Province, which reflects

1  
2  
3  
4 that physicians feel unsafe and have suffered from heavy psychological workloads  
5  
6 during their work.  
7  
8

9 In China, the gap between healthcare demand and supply (thus doctor-patient  
10 ratio) in China has caused physicians in the secondary and tertiary hospital settings to  
11 become overworked[43]. Few physicians in tertiary hospitals can complete their  
12 work in regular 8 hours. Research has reported that physicians may feel stressed when  
13 poor scheduling leaves them pressed for time[44]. Chinese physicians play various  
14 roles during their work and they always need to work overtime, even though they  
15 conduct more than one task at the same time[43]. According to the White Paper on  
16 the Practice of Medicine by Chinese Physicians by the Chinese Medical Association in  
17 2014, 32.7% of doctors had an average workweek over 60 hours[45]. High task  
18 demands require plenty of time, and evoke high mental effort and heavy workload for  
19 physicians[46]. Mental workload encompasses the subjective experience of a given  
20 task load[47], the higher the task load, the higher the mental workload[48].  
21  
22  
23  
24  
25  
26  
27  
28  
29  
30  
31  
32  
33  
34  
35  
36  
37  
38  
39

40 Consistent with previous research on NASA-TLX[49], performance dimension  
41 shows a limited practical relevance since it is influenced by variations in physical load.  
42 In our study, the item-total scores of the two items in the dimension of performance  
43 were near to 0.4, and perhaps, would have been relevant in a reverse scoring. Other  
44 research reported that subjective assessments of mental workload may not provide  
45 accurate estimation of the performance dimension[17]. Considering this information,  
46 we retain the two items but revised their description.  
47  
48  
49  
50  
51  
52  
53  
54  
55  
56  
57

58 Although we have attempted an accurate examination of the measurement  
59  
60

1  
2  
3  
4 properties of the physician mental workload scale, there were still some limitations  
5  
6 that merit discussions. One of the limitations was potential reporting bias in the self-  
7  
8 reported measurements of the workload among physicians. Secondly, we could not  
9  
10 conduct a re-test reliability because we used a web-based survey method. Thirdly, all  
11  
12 respondents voluntarily decided to take part in the survey. This means physicians who  
13  
14 were overburdened at the time of the survey may not have time to take part in the  
15  
16 survey, resulting in a selection bias.  
17  
18  
19  
20  
21

22 Notwithstanding these limitations, creating new scale items from a subjective  
23  
24 perspective is of paramount importance in investigating Chinese physician's workload.  
25  
26 Physician mental workload scale has acceptable preliminary psychometric properties  
27  
28 with six dimensions and twelve items. The use of physician mental workload scale can  
29  
30 help us to find the main stressors in physician mental workload and to implement  
31  
32 targeted optimization strategies to mitigate these stressors in an effort to ameliorate  
33  
34 the physical and mental health of physicians. This, consequently, will help us to  
35  
36 improve the quality and efficiency of healthcare delivery in hospital settings.  
37  
38  
39  
40  
41  
42

### 43 **Abbreviations**

44  
45 CVI: Content Validity Index;  
46

47  
48 RMR: Root of Mean Square Residual; GFI= Good of Fitness Index; CFI= Comparative Fit  
49  
50 Index; TLI=Tucker-Lewis index; CR= Critical Ratio; CV=Coefficient of Variation;  
51

52  
53 NASA-TLX=NASA- Task Load Index; SWAT= Subjective Workload Assessment  
54  
55 Technique;  
56

57  
58 EMRs= Electronic Medical Records  
59  
60

1  
2  
3  
4 **Funding Statement:** This work was supported by the National Natural Science  
5  
6 Foundation of China (grant number 71774062). The funder had no role in study design,  
7  
8 data collection and analysis, decision to publish, or preparation of the manuscript.  
9  
10

11 **Acknowledgement** We would like to thank all the participants involved in this  
12  
13 research for their time and contributions.  
14  
15

16 **Author Contributors:** YH and QF designed the study; CL and JX made formal analysis;  
17  
18 YH obtained funding; CL, JX and LD took part in investigation; LW and LD were involved  
19  
20 in data cleaning; CL wrote original draft; SG and QF contributed to the interpretation  
21  
22 of the results and critical revision of the manuscript; All authors have read and  
23  
24 approved the final manuscript.  
25  
26  
27  
28

29 **Competing interests:** We have read and understood BMJ policy on declaration of  
30  
31 interests and declare that we have no competing interests.  
32  
33  
34

35 **Patient consent:** Not required.  
36  
37

38 **Data sharing:** The datasets used and/or analyzed during the current study are  
39  
40 available from the corresponding author on reasonable request.  
41  
42  
43  
44  
45

## 46 **Reference**

- 47 1. Györfy Z, Dweik D, Girasek E. Workload, mental health and burnout indicators  
48 among female physicians[J]. *Hum resour health*, 2016, 14: 12.
- 49 2. Lu L, Gao M, Yang T, et al. The updated Physician's Pledge and Chinese junior  
50 physicians. *The Lancet*. 2018;391:305.
- 51 3. Karahan A, Kav S, Abbasoglu A, et al. Low back pain: prevalence and associated risk  
52 factors among hospital staff. *J Adv Nurs*. 2009;65: 516-524.  
53  
54  
55  
56  
57  
58  
59  
60

- 1  
2  
3  
4 4. Smith-Miller CA, Shaw-Kokot J, Curro B, et al. An integrative review: fatigue among  
5  
6 nurses in acute care settings. *J Nurs Adm.* 2014;44:487-494.
- 7  
8 5. Arvidsson I, Simonsen JG, Balogh I. Discrepancies in pain presentation caused by  
9  
10 adverse psychosocial conditions as compared to pain due to high physical  
11  
12 workload? *Work.* 2012;41:2472-2475.
- 13  
14 6. Manty M, Moller A, Nilsson C, et al. Association of physical workload and leisure  
15  
16 time physical activity with incident mobility limitations: a follow-up study. *Occup*  
17  
18 *Environ Med.* 2014; 71:543-548.
- 19  
20 7. Ridley C. Relating nursing workload to quality of care in child and adolescent mental  
21  
22 health inpatient services. *Int J Health Care Qual Assur.*2007;20:429-440.
- 23  
24 8. Michtalik HJ, Pronovost PJ, Marsteller JA, et al. Identifying potential predictors of a  
25  
26 safe attending physician workload: a survey of hospitalists. *J Hosp Med.*2013;  
27  
28 8:644-646.
- 29  
30 9. Michtalik HJ, Yeh HC, Pronovost PJ, et al. Impact of attending physician workload  
31  
32 on patient care a survey of hospitalists. *JAMA Intern Med.*2013; 173:375-377.
- 33  
34 10. Garcia-Lacalle J. Balancing physician workload and patient satisfaction: a dilemma  
35  
36 for hospital managers. *Public Money & Management.*2010;30:183-188.
- 37  
38 11. Steyrer J, Schiffinger M, Huber C, et al. Attitude is everything? The impact of  
39  
40 workload, safety climate, and safety tools on medical errors: a study of intensive  
41  
42 care units. *Health Care Manage R.*2013;38:306-316.
- 43  
44 12. Pedroja AT, Blegen MA, Abravanel R. The relationship between hospital systems  
45  
46 load and patient harm. *J Patient Saf.* 2014;10:168-175.
- 47  
48 13. Williams E S, Rondeau K V, Xiao Q, et al. Heavy physician workloads: impact on  
49  
50 physician attitudes and outcomes. *Health Care Manage R,* 2007, 20: 261-269.
- 51  
52 14. Hart SG. Theory and Measurement of Human Workload. *J Oper Res*  
53  
54 *Soc.*1988;39:725-734.
- 55  
56 15. Cain B. A review of the mental workload literature. Toronto: Defence Research  
57  
58 And Development, 2007.
- 59  
60 16. Lysaght RJ, Hill SG, Dick AO, et al. Operator workload: Comprehensive review and  
evaluation of operator workload methodologies. Analytics inc willow grove pa,

- 1  
2  
3  
4 1989.
- 5  
6 17. Rubio-Valdehita S, Lopez-Nunez MI, Lopez-Higes R, et al. Development of the  
7 CarMen-Q Questionnaire for mental workload assessment. *Psicothema*. 2017;  
8 29:570-576.
- 9  
10  
11 18. Weigl M, Müller A, Holland S, et al. Work conditions, mental workload and patient  
12 care quality: a multisource study in the emergency department. *BMJ Qual Saf*.  
13 2016; 25: 499-508.
- 14  
15 19. European Commission. European Pact for health and mental health.  
16 [http://ec.europa.eu/health/mental\\_health/policy\\_es](http://ec.europa.eu/health/mental_health/policy_es). (Accessed on 24th Sep  
17 2018)
- 18  
19 20. Jex HR. Measuring mental workload: Problems, progress, and promises. *Adv*  
20 *Psychol*, 1988, 52: 5-39.
- 21  
22 21. Bertram DA, Opila DA, Brown JL, et al. Measuring physician mental workload:  
23 reliability and validity assessment of a brief instrument. *Med Care*.1992;30: 95-  
24 104.
- 25  
26 22. Hart SG, Staveland LE. Development of NASA-TLX (Task Load Index): Results of  
27 empirical and theoretical research. *Adv Psychol*. 1998;52:139-183.
- 28  
29 23. Rubio S, Díaz E, Martín J, et al. Evaluation of subjective mental workload: A  
30 comparison of SWAT, NASA-TLX, and workload profile methods. *Appl Psychol*.  
31 2004; 53: 61-86.
- 32  
33 24. Hill SG, Iavecchia HP, Byers JC. Comparison of four subjective workload rating  
34 scales. *Hum Factors*.1992;34:429.
- 35  
36 25. Colligan L, Potts HW, Finn CT, et al. Cognitive workload changes for nurses  
37 transitioning from a legacy system with paper documentation to a commercial  
38 electronic health record. *Int J Med Inform*.2015; 84:469-476.
- 39  
40 26. Hoonakker P, Carayon P, Gurses A, et al. Measuring Workload Of ICU Nurses with  
41 a Questionnaire Survey: The NASA Task Load Index (TLX). *IIE Trans Healthc Syst*  
42 *Eng*. 2011;1:131-143.
- 43  
44 27. Malekpour F, Malekpour A R, Mohammadian Y, et al. Assessment of mental  
45 workload in nursing by using NASA-TLX. *The Journal of Urmia Nursing and*  
46  
47  
48  
49  
50  
51  
52  
53  
54  
55  
56  
57  
58  
59  
60



- 1  
2  
3  
4 *Midwifery Faculty*.2014; 11: 892-899.
- 5  
6 28. Reid GB, Nygren TE. The Subjective Workload Assessment Technique: A Scaling  
7 Procedure for Measuring Mental Workload. *Adv Psychol*.1988; 52.
- 8  
9  
10 29. Zhou H, Han X, Zhang J, et al. Job satisfaction and associated factors among medical  
11 staff in tertiary public hospitals: Results from a national cross-sectional survey in  
12 China. *Int J Occup Env Heal*. 2018; 15: 1528.
- 13  
14  
15 30. Sun J, Ma J, Hu G, et al. Welfare, wellness, and job satisfaction of Chinese  
16 physicians: A national survey of public tertiary hospitals in China. *Int J Health Plan*  
17 *M*. 2017; 32: 270-284.
- 18  
19  
20 31. The Lancet, Ending violence against doctors in China. *The Lancet*. 2012; 379:1764.
- 21  
22  
23 32. Chinese Hospital Association. Chinese patient safety goal 2014-2015.  
24 <http://www.cha.org.cn/plus/view.php?aid=14626> (Accessed on 24<sup>th</sup> Sep 2018)
- 25  
26  
27 33. Power M, Quinn K, Schmidt S, et al. Development of the WHOQOL-old module.  
28 *Qual Life Res*. 2005; 14 (10):2197-2214.
- 29  
30  
31 34. Kline RB. Principles and practice of structural equation modeling. 3rd ed. New York:  
32 Guilford publications, 2015:69-70.
- 33  
34  
35 35. Ford JK, MacCullum RC, Tait M. The application of exploratory factor analysis in  
36 applied psychology: A critical review and analysis. *Pers Psychol*. 1986; 39:291-314.
- 37  
38  
39 36. Nunnally J C. Psychometric theory. New York: McGraw-Hill, 1967.
- 40  
41  
42 37. Lynn MR. Determination and quantification of content validity. *Nursing Res*. 1986;  
43 35:382-385.
- 44  
45  
46 38. Dilorio C K. Measurement in health behavior: methods for research and evaluation.  
47 John Wiley & Sons, 2006.
- 48  
49  
50 39. Tabachnick B, Fidell LS. Using Multivariate Statistics. 6<sup>th</sup> ed., Pearson, Boston, 2013:  
51 720-726.
- 52  
53  
54 40. Tang L, Guan M. Rise of Health Consumerism in China and Its Effects on Physicians'  
55 Professional Identity and the Physician-Patient Relationship and Communication.  
56 *Health commun*.2018; 33:636-642.
- 57  
58  
59 41. Yueju L. Violence against doctors in China. *The Lancet*. 2014; 384:745.
- 60  
42. Sun T, Gao L, Shi Y. Workplace violence, psychological stress, sleep quality and

- 1  
2  
3  
4 subjective health in chinese doctors: a large cross-sectional study. *BMJ OPEN*.  
5 2017;1-8.  
6  
7  
8 43. Wen J, Cheng Y, Hu X. Workload, burnout, and medical mistakes among physicians  
9 in China: A cross-sectional study. *Biosci trends*. 2016; 10:27-33.  
10  
11 44. Horner RD, Szaflarsk JP, Ying J. Physician Work Intensity Among Medical Specialties:  
12 Emerging Evidence on its Magnitude and Composition. *Med care*. 2011; 49:1007-  
13 1011.  
14  
15  
16  
17 45. Chinese Medical Doctor Association. White Paper on the Practice of Medi  
18 cine by Chinese Physicians. [http://www.cmda.net/xiehuixiangmu/falvshiwubu](http://www.cmda.net/xiehuixiangmu/falvshiwubu/tongzhigonggao/2015-05-28/14587.html)  
19 [u/tongzhigonggao/2015-05-28/14587.html](http://www.cmda.net/xiehuixiangmu/falvshiwubu/tongzhigonggao/2015-05-28/14587.html). (Accessed on 24<sup>th</sup> Sep 2018)  
20  
21  
22  
23 46. Mosaly PR, Mazur LM, Yu F. Relating Task Demand, Mental Effort and Task  
24 Difficulty with Physicians' Performance during Interactions with Electronic Health  
25 Records (EHRs). *Int J Hum-Comput Int*. 2017; 34:467-475.  
26  
27  
28  
29 47. Charles RL, Nixon J. Measuring mental workload using physiological measures: A  
30 systematic review[J]. *Appl ergon*. 2019; 74: 221-232.  
31  
32  
33 48. Colle HA, Reid GB. Context effects in subjective mental workload ratings. *Hum*  
34 *factors*. 1998; 40: 591-600.  
35  
36  
37 49. DiDomenico A, Nussbaum MA. Effects of different physical workload parameters  
38 on mental workload and performance. *Int J Ind Ergonom* 2011. 41;255-260.  
39  
40  
41  
42  
43  
44  
45  
46  
47  
48  
49  
50  
51  
52  
53  
54  
55  
56  
57  
58  
59  
60

# Reporting checklist for cross sectional study.

Based on the STROBE cross sectional guidelines.

## Instructions to authors

Complete this checklist by entering the page numbers from your manuscript where readers will find each of the items listed below.

Your article may not currently address all the items on the checklist. Please modify your text to include the missing information. If you are certain that an item does not apply, please write "n/a" and provide a short explanation.

Upload your completed checklist as an extra file when you submit to a journal.

In your methods section, say that you used the STROBE cross sectional reporting guidelines, and cite them as:

von Elm E, Altman DG, Egger M, Pocock SJ, Gotsche PC, Vandembroucke JP. The Strengthening the Reporting of Observational Studies in Epidemiology (STROBE) Statement: guidelines for reporting observational studies.

|                        |     | Reporting Item                                                                                                                  | Page Number |
|------------------------|-----|---------------------------------------------------------------------------------------------------------------------------------|-------------|
| Title                  | #1a | Indicate the study's design with a commonly used term in the title or the abstract                                              | 1           |
| Abstract               | #1b | Provide in the abstract an informative and balanced summary of what was done and what was found                                 | 2           |
| Background / rationale | #2  | Explain the scientific background and rationale for the investigation being reported                                            | 3-4         |
| Objectives             | #3  | State specific objectives, including any prespecified hypotheses                                                                | 5           |
| Study design           | #4  | Present key elements of study design early in the paper                                                                         | 5           |
| Setting                | #5  | Describe the setting, locations, and relevant dates, including periods of recruitment, exposure, follow-up, and data collection | 5           |
| Eligibility criteria   | #6a | Give the eligibility criteria, and the sources and methods of selection of participants.                                        | 9           |

|    |                  |      |                                                                   |     |
|----|------------------|------|-------------------------------------------------------------------|-----|
| 1  |                  | #7   | Clearly define all outcomes, exposures, predictors, potential     | 8-9 |
| 2  |                  |      | confounders, and effect modifiers. Give diagnostic criteria, if   |     |
| 3  |                  |      | applicable                                                        |     |
| 4  |                  |      |                                                                   |     |
| 5  |                  |      |                                                                   |     |
| 6  | Data sources /   | #8   | For each variable of interest give sources of data and details of | n/a |
| 7  | measurement      |      | methods of assessment (measurement). Describe                     |     |
| 8  |                  |      | comparability of assessment methods if there is more than one     |     |
| 9  |                  |      | group. Give information separately for for exposed and            |     |
| 10 |                  |      | unexposed groups if applicable.                                   |     |
| 11 |                  |      |                                                                   |     |
| 12 |                  |      |                                                                   |     |
| 13 |                  |      |                                                                   |     |
| 14 | Bias             | #9   | Describe any efforts to address potential sources of bias         | 17  |
| 15 |                  |      |                                                                   |     |
| 16 |                  |      |                                                                   |     |
| 17 | Study size       | #10  | Explain how the study size was arrived at                         | 9   |
| 18 |                  |      |                                                                   |     |
| 19 | Quantitative     | #11  | Explain how quantitative variables were handled in the            | n/a |
| 20 | variables        |      | analyses. If applicable, describe which groupings were chosen,    |     |
| 21 |                  |      | and why                                                           |     |
| 22 |                  |      |                                                                   |     |
| 23 |                  |      |                                                                   |     |
| 24 | Statistical      | #12a | Describe all statistical methods, including those used to control | 8-9 |
| 25 | methods          |      | for confounding                                                   |     |
| 26 |                  |      |                                                                   |     |
| 27 |                  |      |                                                                   |     |
| 28 |                  | #12b | Describe any methods used to examine subgroups and                | n/a |
| 29 |                  |      | interactions                                                      |     |
| 30 |                  |      |                                                                   |     |
| 31 |                  |      |                                                                   |     |
| 32 |                  | #12c | Explain how missing data were addressed                           | 9   |
| 33 |                  |      |                                                                   |     |
| 34 |                  |      |                                                                   |     |
| 35 |                  | #12d | If applicable, describe analytical methods taking account of      | 8-9 |
| 36 |                  |      | sampling strategy                                                 |     |
| 37 |                  |      |                                                                   |     |
| 38 |                  |      |                                                                   |     |
| 39 |                  | #12e | Describe any sensitivity analyses                                 | n/a |
| 40 |                  |      |                                                                   |     |
| 41 | Participants     | #13a | Report numbers of individuals at each stage of study—eg           | 5-6 |
| 42 |                  |      | numbers potentially eligible, examined for eligibility, confirmed |     |
| 43 |                  |      | eligible, included in the study, completing follow-up, and        |     |
| 44 |                  |      | analysed. Give information separately for for exposed and         |     |
| 45 |                  |      | unexposed groups if applicable.                                   |     |
| 46 |                  |      |                                                                   |     |
| 47 |                  |      |                                                                   |     |
| 48 |                  |      |                                                                   |     |
| 49 |                  | #13b | Give reasons for non-participation at each stage                  | n/a |
| 50 |                  |      |                                                                   |     |
| 51 |                  |      |                                                                   |     |
| 52 |                  | #13c | Consider use of a flow diagram                                    | n/a |
| 53 |                  |      |                                                                   |     |
| 54 | Descriptive data | #14a | Give characteristics of study participants (eg demographic,       | 9   |
| 55 |                  |      | clinical, social) and information on exposures and potential      |     |
| 56 |                  |      | confounders. Give information separately for exposed and          |     |
| 57 |                  |      | unexposed groups if applicable.                                   |     |
| 58 |                  |      |                                                                   |     |
| 59 |                  |      |                                                                   |     |
| 60 |                  |      |                                                                   |     |

|    |                  |      |                                                                      |       |
|----|------------------|------|----------------------------------------------------------------------|-------|
| 1  |                  | #14b | Indicate number of participants with missing data for each           | 9     |
| 2  |                  |      | variable of interest                                                 |       |
| 3  |                  |      |                                                                      |       |
| 4  |                  |      |                                                                      |       |
| 5  | Outcome data     | #15  | Report numbers of outcome events or summary measures.                | 11-14 |
| 6  |                  |      | Give information separately for exposed and unexposed                |       |
| 7  |                  |      | groups if applicable.                                                |       |
| 8  |                  |      |                                                                      |       |
| 9  |                  |      |                                                                      |       |
| 10 | Main results     | #16a | Give unadjusted estimates and, if applicable, confounder-            | n/a   |
| 11 |                  |      | adjusted estimates and their precision (eg, 95% confidence           |       |
| 12 |                  |      | interval). Make clear which confounders were adjusted for and        |       |
| 13 |                  |      | why they were included                                               |       |
| 14 |                  |      |                                                                      |       |
| 15 |                  |      |                                                                      |       |
| 16 |                  |      |                                                                      |       |
| 17 |                  | #16b | Report category boundaries when continuous variables were            | n/a   |
| 18 |                  |      | categorized                                                          |       |
| 19 |                  |      |                                                                      |       |
| 20 |                  |      |                                                                      |       |
| 21 |                  | #16c | If relevant, consider translating estimates of relative risk into    | n/a   |
| 22 |                  |      | absolute risk for a meaningful time period                           |       |
| 23 |                  |      |                                                                      |       |
| 24 | Other analyses   | #17  | Report other analyses done—e.g., analyses of subgroups and           | n/a   |
| 25 |                  |      | interactions, and sensitivity analyses                               |       |
| 26 |                  |      |                                                                      |       |
| 27 |                  |      |                                                                      |       |
| 28 | Key results      | #18  | Summarise key results with reference to study objectives             | 14-16 |
| 29 |                  |      |                                                                      |       |
| 30 |                  |      |                                                                      |       |
| 31 | Limitations      | #19  | Discuss limitations of the study, taking into account sources of     | 16-17 |
| 32 |                  |      | potential bias or imprecision. Discuss both direction and            |       |
| 33 |                  |      | magnitude of any potential bias.                                     |       |
| 34 |                  |      |                                                                      |       |
| 35 |                  |      |                                                                      |       |
| 36 | Interpretation   | #20  | Give a cautious overall interpretation considering objectives,       | 17    |
| 37 |                  |      | limitations, multiplicity of analyses, results from similar studies, |       |
| 38 |                  |      | and other relevant evidence.                                         |       |
| 39 |                  |      |                                                                      |       |
| 40 |                  |      |                                                                      |       |
| 41 | Generalisability | #21  | Discuss the generalisability (external validity) of the study        | 17    |
| 42 |                  |      | results                                                              |       |
| 43 |                  |      |                                                                      |       |
| 44 |                  |      |                                                                      |       |
| 45 | Funding          | #22  | Give the source of funding and the role of the funders for the       | 17    |
| 46 |                  |      | present study and, if applicable, for the original study on which    |       |
| 47 |                  |      | the present article is based                                         |       |
| 48 |                  |      |                                                                      |       |
| 49 |                  |      |                                                                      |       |

50 The STROBE checklist is distributed under the terms of the Creative Commons Attribution License  
 51 CC-BY. This checklist was completed on 25. February 2019 using <https://www.goodreports.org/>, a  
 52 tool made by the [EQUATOR Network](#) in collaboration with [Penelope.ai](#)  
 53  
 54  
 55

# BMJ Open

## Physician Mental Workload Scale in China: Development and Psychometric Evaluation

|                                 |                                                                                                                                                                                                                                                                                                                                                                                                                                                                                                                                                                                                                                                                                                                                                                                                                                                                                                                                                    |
|---------------------------------|----------------------------------------------------------------------------------------------------------------------------------------------------------------------------------------------------------------------------------------------------------------------------------------------------------------------------------------------------------------------------------------------------------------------------------------------------------------------------------------------------------------------------------------------------------------------------------------------------------------------------------------------------------------------------------------------------------------------------------------------------------------------------------------------------------------------------------------------------------------------------------------------------------------------------------------------------|
| Journal:                        | <i>BMJ Open</i>                                                                                                                                                                                                                                                                                                                                                                                                                                                                                                                                                                                                                                                                                                                                                                                                                                                                                                                                    |
| Manuscript ID                   | bmjopen-2019-030137.R1                                                                                                                                                                                                                                                                                                                                                                                                                                                                                                                                                                                                                                                                                                                                                                                                                                                                                                                             |
| Article Type:                   | Original research                                                                                                                                                                                                                                                                                                                                                                                                                                                                                                                                                                                                                                                                                                                                                                                                                                                                                                                                  |
| Date Submitted by the Author:   | 04-Jul-2019                                                                                                                                                                                                                                                                                                                                                                                                                                                                                                                                                                                                                                                                                                                                                                                                                                                                                                                                        |
| Complete List of Authors:       | Lu, Chuntao; Huazhong University of Science and Technology Tongji Medical College, School of Medicine and Health Management<br>Hu, Yinhan; Huazhong University of Science and Technology Tongji Medical College, School of Medicine and Health Management<br>Fu, Qiang; Saint Louis University, College for Public Health and Social Justice, Department of Epidemiology and Biostatistics<br>Governor, Samuel ; Saint Louis University, College for Public Health and Social Justice, Department of Epidemiology and Biostatistics<br>Wang, Liuming; Huazhong University of Science and Technology Tongji Medical College, Tongji Hospital<br>Li, Chao; Jingmen No 2 People's Hospital<br>Deng, Lu; Huazhong University of Science and Technology Tongji Medical College, School of Medicine and Health Management<br>Xie, Jinzhu; Huazhong University of Science and Technology Tongji Medical College, School of Medicine and Health Management |
| <b>Primary Subject Heading</b>: | Mental health                                                                                                                                                                                                                                                                                                                                                                                                                                                                                                                                                                                                                                                                                                                                                                                                                                                                                                                                      |
| Secondary Subject Heading:      | Mental health                                                                                                                                                                                                                                                                                                                                                                                                                                                                                                                                                                                                                                                                                                                                                                                                                                                                                                                                      |
| Keywords:                       | Physician, MENTAL HEALTH, Workload, Survey and Questionnaires, Hospitals, Public                                                                                                                                                                                                                                                                                                                                                                                                                                                                                                                                                                                                                                                                                                                                                                                                                                                                   |
|                                 |                                                                                                                                                                                                                                                                                                                                                                                                                                                                                                                                                                                                                                                                                                                                                                                                                                                                                                                                                    |

SCHOLARONE™  
Manuscripts

**Title page**

Physician Mental Workload Scale in China: Development and Psychometric Evaluation

Chuntao Lu Yinhuan Hu\* Qiang Fu Samuel Governor Liuming Wang Chao Li Lu Deng

Jinzhu Xie

Corresponding author:

\*Yinhuan Hu

Address: No.13 Hangkong Rd., Wuhan, Hubei 430030, P.R. China

Email: [hyh288@hotmail.com](mailto:hyh288@hotmail.com)

Telephone number: 13554285879

Co-author:

**Chuntao Lu:** School of Medicine and Health Management, Tongji Medical College, Huazhong University of Science and Technology, No.13 Hangkong Rd., Wuhan, Hubei 430030, P.R. China

**Yinhuan Hu:** School of Medicine and Health Management, Tongji Medical College, Huazhong University of Science and Technology, No.13 Hangkong Rd., Wuhan, Hubei 430030, P.R. China

**Qiang Fu:** Department of Epidemiology and Biostatistics, College for Public Health and Social Justice, Saint Louis University, Missouri, MO, United States

**Samuel Governor:** Department of Epidemiology and Biostatistics, College for Public Health and Social Justice, Saint Louis University, Missouri, MO, United States

**Liuming Wang:** Tongji Hospital, Tongji Medical College of Huazhong University of

1  
2  
3  
4 Science and Technology, No.1095 Jiefang Rd., Wuhan, Hubei 430030, P.R. China  
5

6 **Chao Li:** Jingmen No 2 People's Hospital. No.39 Xiangshan Rd., Jingmen, Hubei 448126,  
7  
8  
9 P.R. China  
10

11 **Lu Deng :** School of Medicine and Health Management, Tongji Medical College,  
12  
13  
14 Huazhong University of Science and Technology, No.13 Hangkong Rd.,Wuhan, Hubei  
15  
16  
17 430030, P.R. China  
18

19 **Jinzhū Xie:** The Third People's Hospital of Hubei Province, No.26 Zhongshan Rd.,  
20  
21  
22 Wuhan, Hubei 430030, P.R. China.  
23  
24  
25  
26  
27  
28  
29  
30  
31  
32  
33  
34  
35  
36  
37  
38  
39  
40  
41  
42  
43  
44  
45  
46  
47  
48  
49  
50  
51  
52  
53  
54  
55  
56  
57  
58  
59  
60



## Abstract

**Objective:** The purpose of our study is to develop and perform reliability and validity assessments of mental workload scale for physicians in China.

**Design:** Three phases, involving 396 physicians from different-level of comprehensive public hospitals in China, were conducted to develop the instrument. In the first phase, an initial item pool was developed through systematic literature review. The second phase consisted of two rounds of Delphi expert consultations and a pilot survey. The third phase tested reliability and validity of the instrument.

**Setting:** Public hospitals in China.

**Participants:** A total of 396 physicians from different tiers of comprehensive public hospitals in China participated in this study in 2018.

**Primary and secondary outcome measures:** Cronbach's alpha, content validity index, correlation coefficient between items and dimensions, and indices of confirmatory factor analysis.

**Results:** Six dimensions (mental demand, physical demand, temporal demand, perceived risk, frustration level, and performance) and twelve items were identified in the instrument. For reliability, Cronbach's  $\alpha$  for the whole scale was 0.81. For validity, the corrected item-content validity index of each item ranged from 0.85 to 1 and correlation coefficients between dimensions and total scores had a range of 0.37-0.72. The results of confirmatory factor analysis showed that the goodness of indices of the scale was reasonably well.

**Conclusion:** The instrument showed good reliability and validity, and it is useful for

1  
2  
3  
4 diagnosing mental workload of physicians.  
5

6 **Keywords:** Physician; Mental Health; Workload; Survey and Questionnaires; Hospitals,  
7  
8  
9 Public  
10

## 11 12 13 14 **Article Summary**

### 15 16 17 **Strengths and limitations of this study**

18  
19 This is the first study to develop a measurement about physician mental workload  
20  
21 from a subjective perspective in China.  
22

23  
24 Qualitative and quantitative methods were involved in item selection.  
25

26  
27 There is potential a reporting bias in the self-reported measurements of the workload  
28  
29 among physicians.  
30

31  
32 There existed a selection bias due to all respondents voluntarily rather than randomly  
33  
34 took part in the survey.  
35

36  
37 Among six dimensions, perceived risk only included one item, which may result in  
38  
39 measurement error.  
40  
41  
42  
43  
44  
45  
46  
47  
48  
49  
50  
51  
52  
53  
54  
55  
56  
57  
58  
59  
60

## Introduction

Internationally, there has been a focus on the relationship between physicians' workload and their health. <sup>1</sup> Physicians' health is highly associated with workload. <sup>2</sup> Excessive workload impacts physician's health <sup>3-4</sup> and increases the risk of work-related musculoskeletal disorders (MSDs). <sup>5-6</sup> Exposure to workload has been shown to be related to adverse effects in medical errors <sup>7</sup> and adverse incidents. <sup>8</sup> Physician workload could be a negatively contributing factor to patients' perceived quality of care, <sup>9</sup> and affects patient satisfaction <sup>10</sup> and safety. <sup>11-12</sup> It is possible that these stressors have reached a point where they pose a serious problem for the entire healthcare system. <sup>13</sup> Thus, the unreasonable and overwhelming workload has adverse effects to physicians, patients and healthcare organizations. <sup>14</sup>

Workload is thought to be multidimensional and multifaceted. <sup>15</sup> One aspect of workload includes the subjective psychological experiences of the human operator. <sup>16</sup> Mental workload as a kind of workload has emerged as one of the most important occupational risk factors, which results in burnout or anxiety. <sup>17</sup> Lack of control over workload was expected to correlate most highly with burnout. <sup>18,19</sup> Heavy mental workload can lead to serious health problems (cardiovascular diseases, digestive problems, etc.) for physicians as well. <sup>17</sup> Meanwhile, the excessive mental workload can also lead to an inferior quality of care service. <sup>20</sup> Currently, The European Pact for Mental Health and Welfare is conducting mental workload assessments to promote physical and mental wellbeing. <sup>21</sup>

Different tools have been proposed to assess mental workload. Previous research

1  
2  
3  
4 has established a brief instrument with six items to measure physician mental  
5  
6 workload.<sup>22</sup> The NASA-Task Load Index (NASA-TLX) scale which was widely used in  
7  
8 measuring mental workload<sup>23</sup> has proven to be a sensitive, valid, and reliable  
9  
10 instrument<sup>24</sup> and can be used in human factors research.<sup>25</sup> Researcher has localized  
11  
12 it as a 29-item questionnaire in Spain to measure workers' mental workload.<sup>26</sup> The  
13  
14 existing body of research on NASA-TLX suggested that it could be used to measure  
15  
16 nurse workload in health care settings.<sup>27-29</sup> In the same vein, the Subjective Workload  
17  
18 Assessment Technique (SWAT) is a subjective rating technique with three dimensions  
19  
20 of time load, mental effort load, and psychological stress load, which is used to assess  
21  
22 mental workload as well.<sup>30</sup> It has been successfully applied in the mental workload  
23  
24 assessment of several aircraft multitask conditions, such as assessing the mental  
25  
26 workload of different systems of air defense.<sup>24</sup> Copenhagen Psychosocial  
27  
28 Questionnaire was a wide-spread tool used in the industrial or in the services branch  
29  
30 in Europe, which included the main dimensions of the most influential psychosocial  
31  
32 theories at work.<sup>31</sup> Together these tools provide important insights into workload  
33  
34 measurement in health care management, especially in nurse workload measurement.  
35  
36 However, there is still different workload between physicians and nurses essentially,  
37  
38 meanwhile, these measurement was designed for other workers, so we do not ensure  
39  
40 these tool can be directly used in physician mental workload measurement.  
41  
42 Specifically, mental workload measurement needs to be developed for physicians.  
43  
44  
45  
46  
47  
48  
49  
50  
51  
52  
53  
54

55  
56 With the increasing of patient demands for health, physicians tend to have a  
57  
58 heavier workload, worse physical health, more mental strain and more intense  
59  
60

1  
2  
3  
4 relationships with patients in China.<sup>32</sup> Data from several studies suggest that most  
5  
6 physicians' work more than 10 hours in a day<sup>33</sup> to manage outpatients and inpatients.  
7  
8 On average, a physician in a tertiary hospital is responsible for 8.10 outpatients and  
9  
10 2.70 beds per day.<sup>32</sup> However, they even have been abused, injured, and in extreme  
11  
12 cases, murdered by patients or their relatives in hospitals across China,<sup>34</sup> which  
13  
14 resulted in extremely mental workload. Establishing the workload measurement  
15  
16 system for medical personnel has been incorporated into Chinese Patient Safety Goals  
17  
18 by Chinese Hospital Association.<sup>35</sup>  
19  
20  
21  
22  
23  
24

25 Existing researches about workload measurement instruments are concentrated  
26  
27 on objective workload in China, for example, the measurement of work time. Whereas  
28  
29 physicians' mental workload is an indispensable problem in China, there are few  
30  
31 instruments exploring physician mental workload in China. The purpose of this paper  
32  
33 is to develop a scientific mental workload instrument, which can be used to measure  
34  
35 or assess the actual mental workload of physicians in China.  
36  
37  
38  
39  
40  
41  
42  
43

## 44 **Methods**

### 47 **Study design**

48  
49  
50  
51 The instrument was developed in three phases. In the first phase, an initial item  
52  
53 pool was developed by integrating previous studies through a systematic literature  
54  
55 review. The second phase consisted of two rounds of Delphi expert consultations and  
56  
57 a pilot survey in 2017. The third phase was testing the psychometric properties of the  
58  
59  
60

1  
2  
3  
4 instrument, including its reliability and validity, through a survey conducted in 2018 in  
5  
6 comprehensive public hospitals in China.  
7  
8  
9

### 10 **Framework and items of generation and selection**

11  
12  
13

14 Based on the framework of NASA-TLX and SWAT, we combined the current  
15  
16 situation of Chinese physicians' workload to determine the item pool. Six dimensions  
17  
18 and fifteen items were sent to 20 experts (including physicians, hospital managers,  
19  
20 researchers, and human resource managers) for consultation. According to two-round  
21  
22 expert consultation, we deleted four items, added a new item (the intensity of physical  
23  
24 activities), and revised the description of all the items. Then, there were six dimensions  
25  
26 (physical demand, mental demand, temporal demand, effort, frustration level, and  
27  
28 performance) and twelve items, which consisted of the pre-scale with a range from 0  
29  
30 to 100.  
31  
32  
33  
34  
35

36  
37 In the pre-survey analysis, we selected 3 hospitals (1 tertiary hospital, 1  
38  
39 secondary hospital, and 1 first-tier hospital) through conveniently sampling. A sample  
40  
41 of 80 physicians was surveyed with a web-based scale during November and  
42  
43 December 2017. Finally, 74 samples were validated to conduct item selection. Items  
44  
45 were refined based on the following indexes or methods: critical ratio (CR), coefficient  
46  
47 of variation (CV), correlation analysis,<sup>36</sup> Cronbach's  $\alpha$ ,<sup>37</sup> and exploratory factor  
48  
49 analysis (EFA).<sup>38</sup>  
50  
51  
52  
53  
54

55 If an item was eliminated by any of the above methods, then the item was  
56  
57 deleted or revised. The final scale consisted of six dimensions (mental demand,  
58  
59  
60

1  
2  
3  
4 physical demand, temporal demand, perceived risk, frustration level, and  
5  
6 performance) and twelve items (Table 1).  
7  
8  
9

### 10 **Data collection for testing the validity and reliability of the scale**

11  
12  
13

14 To test the validity and reliability of the developed scale, we planned to survey  
15  
16 400 respondents (physicians are working in hospitals) from different tier hospitals (2  
17  
18 tertiary hospitals, 2 secondary hospitals, and 2 first-tier hospitals). These hospitals  
19  
20 were randomly selected from Hubei province, China. We used a website--wenjuanxing  
21  
22 ([www.wjx.cn](http://www.wjx.cn)) to survey physicians. The human resource at each participating hospital  
23  
24 sent the access code to the physicians. 396 physicians voluntarily participated in the  
25  
26 survey before March 2018, finally, 11 invalid samples were deleted.  
27  
28  
29  
30  
31

32 There was a detailed description in the guidance of the scale, which showed that  
33  
34 our scale was anonymous and all physicians were voluntary to answer this question.  
35  
36 Meanwhile, we described that the aim of our survey was to develop a physician mental  
37  
38 workload scale, so the results would not be used for other purposes. The physician  
39  
40 mental workload scale included three parts. The first part of the scale was the principal  
41  
42 twelve items. The second part was a table which included 15 pairs in our scale, which  
43  
44 was used to collect the weights of each dimension. Every two dimensions formed a  
45  
46 pair, and the respondents selected which of the two dimensions in a pair they  
47  
48 considered to have contributed more to their workload. There were fifteen pairs the  
49  
50 respondents needed to select from, and the weight of each dimension was equal to  
51  
52 the number of times that dimension was selected divided by fifteen. The third part  
53  
54  
55  
56  
57  
58  
59  
60

was the individual information about the physicians.

The response endpoints of items are displayed in Table 1. Items were scored as follows: 0, 10, 20, 30, 40, 50, 60, 70, 80, 90, 100, the average scores of all items for a corresponding dimension were multiplied by the dimension weight to produce the dimension scores, and then the total scores were the sum of all dimension scores.

Table 1 Dimensions and items of physician mental workload scale

| Dimensions and item                                                                                                                                       | Endpoints (0-100)                                                                                                                                      |
|-----------------------------------------------------------------------------------------------------------------------------------------------------------|--------------------------------------------------------------------------------------------------------------------------------------------------------|
| <b>A Mental demand</b>                                                                                                                                    |                                                                                                                                                        |
| A1 How many cognitive activities (e.g. sensation, perception, remembering, thinking, calculating, attention etc.) were required during your medical work? | no workload <span style="float:right">heaviest workload</span><br>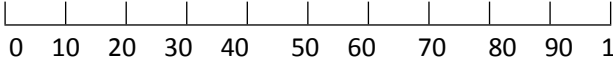   |
| A2 How much emotion and feeling were input (e.g. empathy, sympathy, enthusiasm, negative emotion restraining etc.) during your medical work?              | no workload <span style="float:right">heaviest workload</span><br> |
| A3 How hard did you have to work to overcome difficulties in accomplishing your medical work?                                                             | no workload <span style="float:right">heaviest workload</span><br> |
| <b>B Physical demand</b>                                                                                                                                  |                                                                                                                                                        |
| B1 How many physical activities were required (e.g. standing, sedentary, controlling, repetitive action etc.) in your medical work?                       | no workload <span style="float:right">heaviest workload</span><br> |
| B2 How intensive was the physical activity during your medical work? (Was the work restful or laborious?)                                                 | no workload <span style="float:right">heaviest workload</span><br> |
| <b>C Temporal demand</b>                                                                                                                                  |                                                                                                                                                        |
| C1 How much time pressure did you feel in your medical work? (Daily medical work required time was more/less than available time?)                        | no workload <span style="float:right">heaviest workload</span><br> |
| C2 How frequently did you have to complete multiple tasks at the same time (work overlap) in your medical work?                                           | no workload <span style="float:right">heaviest workload</span><br> |
| <b>D Perceived risk</b>                                                                                                                                   |                                                                                                                                                        |
| D1 How much risk did you perceive (e.g. medical dispute etc.) in your medical work?                                                                       | no workload <span style="float:right">heaviest workload</span><br> |
| <b>E Frustration level</b>                                                                                                                                |                                                                                                                                                        |



1  
2  
3  
4 E1 How depressed or frustrated did you feel in your medical work? no workload heaviest workload  
5  
6  
7  
8  
9  
10  
11  
12  
13  
14  
15  
16  
17  
18  
19  
20  
21  
22  
23  
24  
25  
26  
27  
28  
29  
30  
31  
32  
33  
34  
35  
36  
37  
38  
39  
40  
41  
42  
43  
44  
45  
46  
47  
48  
49  
50  
51  
52  
53  
54  
55  
56  
57  
58  
59  
60

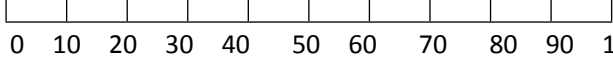

E2 How anxious or irritated did you feel in your medical work? no workload heaviest workload  
0 10 20 30 40 50 60 70 80 90 100

### F Performance

F1 How successful do you think you were in accomplishing the goals in your medical work? heaviest workload no workload  
0 10 20 30 40 50 60 70 80 90 100

F2 How satisfied were you with the outcome in your medical work? heaviest workload no workload  
0 10 20 30 40 50 60 70 80 90 100

## Statistical analysis

Descriptive statistics were used to show the characteristics of the respondents, including gender, age, educational level (i.e. Ph.D. degree, Master degree, Undergraduate), job title (i.e. senior, middle, junior), work years, hospital level (i.e. tertiary hospitals, secondary hospitals, first-tier hospital), work hours per week, number of outpatients serviced per day, and self-perceived health status.

For the reliability of the scale, Cronbach's alpha was used to assess the internal consistency of each instrument component. Values of 0.70 or greater for Cronbach's alpha were considered acceptable.<sup>37</sup>

Content validity index (CVI) of each item was calculated to assess the accuracy of the scale using the scores of 1-4. Experts were invited to assess the items with a scale of 1 representing the item not relevant to corresponding dimension and 4 representing the item closely relevant to the corresponding dimension. Corrected item-content validity index (I-CVI) and average scale-content validity index (S-CVI/Ave)

1  
2  
3  
4 were calculated. Corrected I-CVI of 0.78 or greater and S-CVI/Ave of 0.90 or greater  
5  
6 were considered acceptable.<sup>39</sup>  
7

8  
9 The test of construct validity was tested by correlation coefficient method,  
10  
11 exploratory factor analysis, and confirmatory factor analysis. Items whose values for  
12  
13 item-total correlation and dimension-total correlation below 0.40 were revised or  
14  
15 removed from the scale. A Bartlett's test of sphericity scores lower than 0.05 and a  
16  
17 Kaiser-Meyer-Olkin (KMO) measure of sampling adequacy higher than 0.70 and closer  
18  
19 to 1 were considered appropriate for factor analysis.<sup>40</sup> Exploratory factor analysis and  
20  
21 confirmatory factor analysis was used to further explore and confirm the structure of  
22  
23 the scale. For the exploratory factor analysis, we used a varimax rotated method to  
24  
25 examine whether the structure matched the framework. For the confirmatory factor  
26  
27 analysis, the criterion of model fit indices were listed as follows:  $\chi^2/df < 3$ ; root mean  
28  
29 square error of approximation (RMSEA) < 0.05; root of mean square residual  
30  
31 (RMR) < 0.05; goodness of fit (GFI) > 0.90, comparative fit index (CFI) > 0.90, Tucker-  
32  
33 Lewis index (TLI) > 0.90.<sup>41</sup> Statistical analyses were performed with SPSS V. 21 (IBM  
34  
35 Corp., Armonk, NY, USA) and AMOS V.17 (IBM Corp., Armonk, NY, USA).  
36  
37  
38  
39  
40  
41  
42  
43  
44  
45  
46

#### 47 **Patient and public involvement**

48  
49  
50 This project involves physicians in the second and third phase. All participants  
51  
52 were voluntary and no incentives were provided for the participation. Meanwhile,  
53  
54 Participants were not directly involved in the design and recruitment of this study. The  
55  
56 results were not to be provided back to participants.  
57  
58  
59  
60

## Results

### Sample characteristics

396 responses (online survey) were received and 11 questionnaires were excluded due to incomplete demographic information. There were no issues of floor or ceiling effects as questions to every item were responded as required in the form of a web-based survey. The characteristics of the participants are presented in Table 2.

Table 2 Respondents' characteristic of samples

| Variable                                         | Valid sample | Percentage (%) |
|--------------------------------------------------|--------------|----------------|
| <b>Gender</b>                                    |              |                |
| Male                                             | 200          | 51.9           |
| Female                                           | 185          | 48.1           |
| <b>Age</b>                                       |              |                |
| <45                                              | 258          | 67.0           |
| 45-55                                            | 121          | 31.4           |
| >55                                              | 6            | 1.6            |
| <b>Educational level</b>                         |              |                |
| Ph.D. degree                                     | 36           | 9.4            |
| Master degree                                    | 48           | 12.5           |
| Undergraduate                                    | 184          | 47.8           |
| Junior college                                   | 117          | 30.3           |
| <b>Job title</b>                                 |              |                |
| Senior                                           | 83           | 21.6           |
| Middle                                           | 146          | 37.9           |
| Junior                                           | 156          | 40.5           |
| <b>Work years in his/her institutions (year)</b> |              |                |
| 1-5                                              | 122          | 31.7           |
| 6-10                                             | 91           | 23.6           |
| 11-15                                            | 58           | 15.1           |
| ≥16                                              | 114          | 29.6           |
| <b>Hospital level</b>                            |              |                |

| Variable                                      | Valid sample | Percentage (%) |
|-----------------------------------------------|--------------|----------------|
| Tertiary hospitals                            | 130          | 33.8           |
| Secondary hospitals                           | 124          | 32.2           |
| First-level hospitals                         | 131          | 34.0           |
| <b>Work hours per week</b>                    |              |                |
| <=40                                          | 73           | 19.0           |
| 41-60                                         | 152          | 39.5           |
| >60                                           | 160          | 41.5           |
| <b>Number of outpatients serviced per day</b> |              |                |
| <20                                           | 135          | 35.1           |
| 20-50                                         | 171          | 44.4           |
| >50                                           | 79           | 20.5           |
| <b>Self-perceived health status</b>           |              |                |
| Poor                                          | 65           | 16.9           |
| Fair                                          | 242          | 62.9           |
| Good                                          | 78           | 20.2           |

### Reliability of physician mental workload scale

Each of the six components demonstrated at least satisfactory internal consistency higher than 0.70, with Cronbach's  $\alpha$  in the range of 0.70-0.90. Cronbach's  $\alpha$  for the whole scale was up to 0.81, which indicated that the scale has good reliability.

### Validity of physician mental workload scale

The corrected I-CVI of each item ranged from 0.85-1 (Table 3), which is higher than 0.78. The S-CVI/Ave was 0.96, which is higher than 0.90. All of these showed good content validity of the scale.

The correlation matrix between items and total scores was inspected to confirm the convergent validity, which was indicated by reasonable coefficients of 0.40 and above, except for F1 and F2 (Table 3). Calculated correlation coefficients between dimensions and total scores had a range of 0.37-0.72, which was an additional index

that showed that dimensions and total scores have a good convergent validity. Also, the correlation coefficients among the dimensions were lower than the correlation coefficients between the dimension-total scores, which indicated that the scale has a good discriminant validity (Table 4).

Table 3 Content validity and correlation coefficient of item-total scores of the scale

| Items                             | Corrected I-CVI | Item-total correlations |
|-----------------------------------|-----------------|-------------------------|
| A1 Cognitive activity             | 1               | 0.57                    |
| A2 Emotion and feeling            | 0.85            | 0.57                    |
| A3 Overcoming difficulties        | 0.85            | 0.59                    |
| B1 Physical activity              | 1               | 0.57                    |
| B2 Intensity of physical activity | 1               | 0.65                    |
| C1 Time pressure                  | 1               | 0.69                    |
| C2 Multiple task                  | 0.85            | 0.69                    |
| D1 Risk concern                   | 1               | 0.64                    |
| E1 Depressed or frustrated        | 1               | 0.75                    |
| E2 Anxious or irritated           | 1               | 0.75                    |
| F1 Successful                     | 1               | 0.33*                   |
| F2 Satisfied                      | 1               | 0.31*                   |

\*item-total scores were below than 0.4

Table 4 Correlation coefficient matrix between dimensions and total scores of the scale

| Dimensions          | A    | B    | C    | D    | E    | F    | Total scores |
|---------------------|------|------|------|------|------|------|--------------|
| A Mental demand     | 1    |      |      |      |      |      |              |
| B Physical demand   | 0.43 | 1    |      |      |      |      |              |
| C Temporal demand   | 0.52 | 0.47 | 1    |      |      |      |              |
| D Perceived risk    | 0.46 | 0.38 | 0.44 | 1    |      |      |              |
| E Frustration level | 0.40 | 0.36 | 0.54 | 0.51 | 1    |      |              |
| F Performance       | 0.09 | 0.05 | 0.01 | 0.05 | 0.13 | 1    |              |
| Total scores        | 0.61 | 0.52 | 0.68 | 0.68 | 0.72 | 0.37 | 1            |

## Exploratory factor analysis of physician mental workload scale

The KMO sample adequacy measurement was 0.81, which was higher than the recommended value of 0.70, and Bartlett's test of sphericity with Chi-square value 1950.70 and  $p < 0.000$ . Thus, the data were suitable for factor analysis. Considering experts' suggestion, we selected 6 principal components in the exploratory factor analysis and results showed that the six-dimensional model explained 81.88% of the total variance (Table 5).

The component 1 "mental demand" was developed from 3 items that asked for feeling or memory requirement, emotional requirement, and the effort input to overcome difficulties, with the factor loading in the range of 0.74-0.81. The component 2 "frustration level" consisted of 2 items that asked about anxiety and level of depression or frustration, and the factor loading was in the range of 0.86-0.88. The component 3 "physical demand" consisted of 2 items that related to strength requirement and the intensity of work time with a factor loading in the range of 0.84-0.90.

The component 4 "temporal demand" constituted 2 items that asked about the ratio of required time to available time and frequency of completing multiple tasks, with the factor loading in the range of 0.77-0.82. There were 2 items in the "performance demand" component 5, which related to the sense of achievement and job satisfaction regarding work outcome, with the factor loading in the range of 0.85-0.90. The component 6 "perceived risk" included only 1 item that explained the perception of risk in conducting tasks (such as medical dispute and risk of being

infectious) with a factor loading of 0.84.

Table 5 Factor loadings for the rotated component matrix: varimax rotated components

| Items                             | Components |      |      |      |      |      |
|-----------------------------------|------------|------|------|------|------|------|
|                                   | 1          | 2    | 3    | 4    | 5    | 6    |
| A2 Emotion and feeling            | 0.81       |      |      |      |      |      |
| A1 Cognitive activity             | 0.76       |      |      |      |      |      |
| A3 Overcoming difficulties        | 0.74       |      |      |      |      |      |
| E1 Depressed or frustrated        |            | 0.88 |      |      |      |      |
| E2 Anxious or irritated           |            | 0.86 |      |      |      |      |
| B1 Physical activity              |            |      | 0.90 |      |      |      |
| B2 Intensity of physical activity |            |      | 0.84 |      |      |      |
| C1 Time pressure                  |            |      |      | 0.82 |      |      |
| C2 Multiple task                  |            |      |      | 0.77 |      |      |
| F1 Successful                     |            |      |      |      | 0.90 |      |
| F2 Satisfied                      |            |      |      |      | 0.85 |      |
| D1 Risk concern                   |            |      |      |      |      | 0.84 |

### Confirmatory factor analysis of physician workload scale

The six-factor model obtained after exploratory factor analysis was tested by confirmatory factor analysis using the maximum likelihood estimation method. The goodness-of-fit model was listed as follows:  $\chi^2/df=1.84 (<3)$ , RMR= 0.04 (<0.05), and GFI=0.97 (>0.9), CFI=0.98 (>0.9), TLI=0.97 (>0.9), RMSEA=0.05 ( $\leq 0.05$ ). Referring to the criterion listed above, the model was a good fit for the data.

### Discussion

The purpose of this study was to develop a mental workload scale for physicians

1  
2  
3  
4 and explore the validity and reliability of the scale. According to the results of the tests,  
5  
6 the scale is reliable and valid, hence, it is considered as an effective instrument for  
7  
8 assessing physician mental workload in Chinese comprehensive public hospitals.  
9  
10 Results show a six-dimensional model which includes aspects related to mental  
11  
12 demand, physical demand, temporal demand, perceived risk, frustration level, and  
13  
14 performance. Compared with other relevant scales, this scale only includes 12 items,  
15  
16 which have strength in the aspects of length, so it could be completed in a short time.  
17  
18 As for its contents, the dimensions of perceived risk and temporal demand are  
19  
20 especially distinctive for Chinese physician mental workload.  
21  
22  
23  
24  
25

26  
27 The whole Cronbach's  $\alpha$  of the 12 items was beyond 0.7, which indicated that it  
28  
29 had good reliability. For the content validity, the corrected I-CVI was higher than 0.78  
30  
31 and the S-CVI/Ave was more than 0.9, which showed that it had a good content validity.  
32  
33 For the construct validity, except for F1 and F2, the correlation coefficient between  
34  
35 item and total scores was more than 0.4, which showed that the construct validity was  
36  
37 at a good level. The item F1 and F2 were to explain the aspect of the performance. In  
38  
39 our study, the item-total scores of the two items in the dimension of performance  
40  
41 were near to 0.4, and perhaps, would have been relevant in a reverse scoring.  
42  
43 Consistent with previous research on NASA-TLX, performance dimension shows a  
44  
45 limited practical relevance since it is influenced by variations in physical load.<sup>42</sup> Other  
46  
47 research reported that subjective assessments of mental workload may not provide  
48  
49 an accurate estimation of the performance dimension.<sup>26</sup> Considering this information,  
50  
51 we retained the two items but revised their description.  
52  
53  
54  
55  
56  
57  
58  
59  
60



1  
2  
3  
4 The specific dimension perceived risk, which is a different dimension and not  
5  
6 included in the framework of NASA-TLX and SWAT, is highly associated with physician  
7  
8 mental workload in China. There tends to be an estranged relationship between  
9  
10 physicians and patients which puts physicians at a dangerous risk of being assaulted,  
11  
12 by patients or visitors in their line of work.<sup>43</sup> According to the statistics, 96% of medical  
13  
14 staff have been abused or injured in 2012.<sup>44</sup> The physician-patient relationship is  
15  
16 becoming more and more fragile and has reached an unprecedented poor level in  
17  
18 China.<sup>45</sup> The tense relationship resulted in heavy psychological workloads during their  
19  
20 work.  
21  
22  
23  
24  
25

26  
27 Another dimension of temporal demand is also fully specific. The gap between  
28  
29 healthcare demand and supply (thus doctor-patient ratio) in China has caused  
30  
31 physicians in the secondary and tertiary hospital settings to become overworked.<sup>46</sup>  
32  
33 They always need to work overtime, even though they conduct more than one task at  
34  
35 the same time. According to the report by the Chinese Medical Association in 2018,  
36  
37 physicians in tertiary hospitals had an average workweek of 51.05 hours, which was  
38  
39 more than legal 40 hours per week.<sup>47</sup> Research has reported that physicians may feel  
40  
41 stressed when poor scheduling leaves them pressed for time.<sup>48</sup> Mental workload  
42  
43 encompasses the subjective experience of a given task load.<sup>49</sup> High task demands  
44  
45 require plenty of time and evoke high mental effort and heavy workload for physicians.  
46  
47  
48  
49  
50  
51  
52  
53  
54  
55  
56  
57  
58  
59  
60  
50 Then, the worse the experience of the task load, the higher the mental workload.<sup>51</sup>

Although we have attempted an accurate examination of the measurement properties of the physician mental workload scale by using qualitative and

1  
2  
3  
4 quantitative methods, there were still some limitations that merit discussions. Firstly,  
5  
6 among six dimensions, perceived risk only included one item, which may result in  
7  
8 measurement error. Secondly, there was a potential reporting bias in the self-reported  
9  
10 measurements of the workload among physicians. Thirdly, all respondents voluntarily  
11  
12 decided to take part in the survey. This means physicians who were overburdened at  
13  
14 the time of the survey may not have time to take part in the survey, resulting in a  
15  
16 selection bias. Thus, all of these above need continued research to improve this scale,  
17  
18 meanwhile, burnout was relevant to the mental workload, which was a direction for  
19  
20 further exploration as well.  
21  
22  
23  
24  
25  
26  
27

## 28 **Conclusion**

29  
30  
31  
32 Creating new items from a subjective perspective is of paramount importance in  
33  
34 investigating the Chinese physician's workload. Physician mental workload scale has  
35  
36 acceptable preliminary psychometric properties with six dimensions and twelve items.  
37  
38 The use of a physician mental workload scale can help us to find the main stressors in  
39  
40 physician mental workload and to implement targeted optimization strategies to  
41  
42 mitigate these stressors in an effort to ameliorate the physical and mental health of  
43  
44 physicians. This, consequently, will help us to improve the quality and efficiency of  
45  
46 healthcare delivery in hospital settings.  
47  
48  
49  
50  
51

## 52 **Abbreviations**

53  
54  
55 CVI: Content Validity Index;

56  
57  
58 RMR: Root of Mean Square Residual; GFI= Good of Fitness Index; CFI= Comparative Fit  
59  
60

1  
2  
3  
4 Index; TLI=Tucker-Lewis index; CR= Critical Ratio; CV=Coefficient of Variation;

5  
6 NASA-TLX=NASA- Task Load Index; SWAT= Subjective Workload Assessment  
7  
8  
9 Technique;

10  
11 EMRs= Electronic Medical Records

12  
13  
14 **Funding Statement:** This work was supported by the National Natural Science  
15  
16 Foundation of China (grant number 71774062). The funder had no role in study design,  
17  
18 data collection and analysis, decision to publish, or preparation of the manuscript.  
19

20  
21  
22 **Acknowledgment** We would like to thank all the participants involved in this research  
23  
24 for their time and contributions.

25  
26  
27 **Author Contributors:** Yinhuan Hu and Qiang Fu designed the study; Chuntao Lu and  
28  
29 Jinzhu Xie made formal analysis; Yinhuan Hu obtained funding; Jinzhu Xie and Lu Deng  
30  
31 took part in investigation; Liuming Wang, Chuntao Lu and Lu Deng were involved in  
32  
33 data cleaning; Chuntao Lu wrote original draft; Samuel Governor, Qiang Fu and Chao  
34  
35 Li contributed to the interpretation of the results; Chao Li and Chuntao Lu made critical  
36  
37 revision of the manuscript; All authors have read and approved the final manuscript.  
38  
39

40  
41  
42 **Competing interests:** We have read and understood BMJ policy on declaration of  
43  
44 interests and declare that we have no competing interests.  
45  
46

47  
48 **Patient consent:** Not required.  
49

50  
51 **Ethics approval:** The Ethics Committee of Tongji Medical College, Huazhong University  
52  
53 of Science and Technology (IORG No. IORG0003571) gave the final approval for the  
54  
55 study.  
56

57  
58 **Data sharing:** The datasets used and/or analyzed during the current study are  
59  
60

available from the corresponding author on reasonable request.

## Reference

1. Györfly Z, Dweik D, Girasek E. Workload, mental health and burnout indicators among female physicians[J]. *Hum resour health*, 2016, 14: 12.
2. Lu L, Gao M, Yang T, et al. The updated Physician's Pledge and Chinese junior physicians. *The Lancet*. 2018;391:305.
3. Karahan A, Kav S, Abbasoglu A, et al. Low back pain: prevalence and associated risk factors among hospital staff. *J Adv Nurs*. 2009;65: 516-524.
4. Smith-Miller CA, Shaw-Kokot J, Curro B, et al. An integrative review: fatigue among nurses in acute care settings. *J Nurs Adm*. 2014;44:487-494.
5. Arvidsson I, Simonsen JG, Balogh I. Discrepancies in pain presentation caused by adverse psychosocial conditions as compared to pain due to high physical workload? *Work*. 2012;41:2472-2475.
6. Manty M, Moller A, Nilsson C, et al. Association of physical workload and leisure time physical activity with incident mobility limitations: a follow-up study. *Occup Environ Med*. 2014; 71:543-548.
7. Ridley C. Relating nursing workload to quality of care in child and adolescent mental health inpatient services. *Int J Health Care Qual Assur*.2007;20:429-440.
8. Michtalik HJ, Pronovost PJ, Marsteller JA, et al. Identifying potential predictors of a safe attending physician workload: a survey of hospitalists. *J Hosp Med*.2013; 8:644-646.
9. Michtalik HJ, Yeh HC, Pronovost PJ, et al. Impact of attending physician workload on patient care a survey of hospitalists. *JAMA Intern Med*.2013; 173:375-377.
10. Garcia-Lacalle J. Balancing physician workload and patient satisfaction: a dilemma for hospital managers. *Public Money & Management*.2010;30:183-188.
11. Steyrer J, Schiffinger M, Huber C, et al. Attitude is everything? The impact of

- workload, safety climate, and safety tools on medical errors: a study of intensive care units. *Health Care Manage R*.2013;38:306-316.
12. Pedroja AT, Blegen MA, Abravanel R. The relationship between hospital systems load and patient harm. *J Patient Saf*. 2014;10:168-175.
13. Williams E S, Rondeau K V, Xiao Q, et al. Heavy physician workloads: impact on physician attitudes and outcomes. *Health Care Manage R*, 2007, 20: 261-269.
14. Hart SG. Theory and Measurement of Human Workload. *J Oper Res Soc*.1988;39:725-734.
15. Cain B. A review of the mental workload literature. Toronto: Defence Research And Development, 2007.
16. Lysaght RJ, Hill SG, Dick AO, et al. Operator workload: Comprehensive review and evaluation of operator workload methodologies. Analytics inc willow grove pa, 1989.
- 17 Theorell T, Hammarström A, Aronsson G, et al. A systematic review including meta-analysis of work environment and depressive symptoms[J]. *BMC public health*, 2015, 15(1): 738.
- 18 Noseworthy J, Madara J, Cosgrove D, et al. Physician burnout is a public health crisis: a message to our fellow health care CEOs[J]. *Health Affairs Blog*, 2017.
- 19 Olson K, Sinsky C, Rinne S T, et al. Cross - sectional survey of workplace stressors associated with physician burnout measured by the Mini - Z and the Maslach Burnout Inventory[J]. *Stress and Health*, 2019, 35(2): 157-175.
20. Weigl M, Müller A, Holland S, et al. Work conditions, mental workload and patient care quality: a multisource study in the emergency department. *BMJ Qual Saf*. 2016; 25: 499-508.
21. European Commission. European Pact for health and mental health. [http://ec.europa.eu/health/mental\\_health/policy\\_es](http://ec.europa.eu/health/mental_health/policy_es). (Accessed on 24th Sep 2018)
22. Bertram DA, Opila DA, Brown JL, et al. Measuring physician mental workload: reliability and validity assessment of a brief instrument. *Med Care*.1992;30: 95-104.

- 1  
2  
3  
4 23. Hart SG, Staveland LE. Development of NASA-TLX (Task Load Index): Results of  
5  
6 empirical and theoretical research. *Adv Psychol.* 1998;52:139-183.
- 7  
8 24. Rubio S, Díaz E, Martín J, et al. Evaluation of subjective mental workload: A  
9  
10 comparison of SWAT, NASA-TLX, and workload profile methods. *Appl Psychol.*  
11  
12 2004; 53: 61-86.
- 13  
14 25. Hill SG, Iavecchia HP, Byers JC. Comparison of four subjective workload rating  
15  
16 scales. *Hum Factors.*1992;34:429.
- 17  
18 26. Rubio-Valdehita S, Lopez-Nunez MI, Lopez-Higes R, et al. Development of the  
19  
20 CarMen-Q Questionnaire for mental workload assessment. *Psicothema.* 2017;  
21  
22 29:570-576.
- 23  
24 27. Colligan L, Potts HW, Finn CT, et al. Cognitive workload changes for nurses  
25  
26 transitioning from a legacy system with paper documentation to a commercial  
27  
28 electronic health record. *Int J Med Inform.*2015; 84:469-476.
- 29  
30 28. Hoonakker P, Carayon P, Gurses A, et al. Measuring Workload Of ICU Nurses with  
31  
32 a Questionnaire Survey: The NASA Task Load Index (TLX). *IIE Trans Healthc Syst*  
33  
34 *Eng.* 2011;1:131-143.
- 35  
36 29. Malekpour F, Malekpour A R, Mohammadian Y, et al. Assessment of mental  
37  
38 workload in nursing by using NASA-TLX. *The Journal of Urmia Nursing and*  
39  
40 *Midwifery Faculty.*2014; 11: 892-899.
- 41  
42 30. Reid GB, Nygren TE. The Subjective Workload Assessment Technique: A Scaling  
43  
44 Procedure for Measuring Mental Workload. *Adv Psychol.*1988; 52.
- 45  
46 31. The COPSQ III questionnaire. [https://www.copsoq-network.org/assets/Uplo](https://www.copsoq-network.org/assets/Uploads/annex1-Dimensions-and-items-in-the-COPSQ-III-questionnaire-060718.pdf)  
47  
48 [ads/annex1-Dimensions-and-items-in-the-COPSQ-III-questionnaire-060718.pdf](https://www.copsoq-network.org/assets/Uploads/annex1-Dimensions-and-items-in-the-COPSQ-III-questionnaire-060718.pdf)  
49  
50 f (Accessed on 14<sup>th</sup> June 2019)
- 51  
52 32. Zhou H, Han X, Zhang J, et al. Job satisfaction and associated factors among medical  
53  
54 staff in tertiary public hospitals: Results from a national cross-sectional survey in  
55  
56 China. *Int J Occup Env Heal.* 2018; 15: 1528.
- 57  
58 33. Sun J, Ma J, Hu G, et al. Welfare, wellness, and job satisfaction of Chinese  
59  
60 physicians: A national survey of public tertiary hospitals in China. *Int J Health Plan*  
*M.* 2017; 32: 270-284.

- 1  
2  
3  
4 34. The Lancet, Ending violence against doctors in China. *The Lancet*. 2012; 379:1764.  
5  
6 35. Chinese Hospital Association. Chinese patient safety goal 2014-2015.  
7 <http://www.cha.org.cn/plus/view.php?aid=14626> (Accessed on 24<sup>th</sup> Sep 2018)  
8  
9 36. Power M, Quinn K, Schmidt S, et al. Development of the WHOQOL-old module.  
10 *Qual Life Res*. 2005; 14 (10):2197-2214.  
11  
12 37. Kline RB. Principles and practice of structural equation modeling. 3rd ed. New York:  
13 Guilford publications, 2015:69-70.  
14  
15 38. Ford JK, MacCullum RC, Tait M. The application of exploratory factor analysis in  
16 applied psychology: A critical review and analysis. *Pers Psychol*. 1986; 39:291-314.  
17  
18 39. Lynn MR. Determination and quantification of content validity. *Nursing Res*. 1986;  
19 35:382-385.  
20  
21 40. Dilorio C K. Measurement in health behavior: methods for research and evaluation.  
22 John Wiley & Sons, 2006.  
23  
24 41. Tabachnick B, Fidell LS. Using Multivariate Statistics. 6<sup>th</sup> ed., Pearson, Boston, 2013:  
25 720-726.  
26  
27 42. DiDomenico A, Nussbaum MA. Effects of different physical workload parameters  
28 on mental workload and performance. *Int J Ind Ergonom* 2011. 41;255-260.  
29  
30 43. Tang L, Guan M. Rise of Health Consumerism in China and Its Effects on Physicians'  
31 Professional Identity and the Physician-Patient Relationship and Communication.  
32 *Health commun*.2018; 33:636-642.  
33  
34 44. Yueju L. Violence against doctors in China. *The Lancet*. 2014; 384:745.  
35  
36 45. Sun T, Gao L, Shi Y. Workplace violence, psychological stress, sleep quality and  
37 subjective health in chinese doctors: a large cross-sectional study. *BMJ OPEN*.  
38 2017;1-8.  
39  
40 46. Wen J, Cheng Y, Hu X. Workload, burnout, and medical mistakes among physicians  
41 in China: A cross-sectional study. *Biosci trends*. 2016; 10:27-33.  
42  
43 47. Chinese Medical Doctor Association. White Paper on the Practice of Medi  
44 cine by Chinese Physicians. [http://www.cmda.net/u/cms/www/201807/0618](http://www.cmda.net/u/cms/www/201807/06181247ffex.pdf)  
45 1247ffex.pdf. (Accessed on 14<sup>th</sup> June 2019)  
46  
47 48. Horner RD, Szaflarsk JP, Ying J. Physician Work Intensity Among Medical Specialties:  
48  
49  
50  
51  
52  
53  
54  
55  
56  
57  
58  
59  
60

1  
2  
3  
4 Emerging Evidence on its Magnitude and Composition. *Med care*. 2011; 49:1007-  
5 1011.

6  
7  
8 49. Charles RL, Nixon J. Measuring mental workload using physiological measures: A  
9 systematic review[J]. *Appl ergon*. 2019; 74: 221-232.

10  
11 50. Mosaly PR, Mazur LM, Yu F. Relating Task Demand, Mental Effort and Task  
12 Difficulty with Physicians' Performance during Interactions with Electronic Health  
13 Records (EHRs). *Int J Hum-Comput Int*. 2017; 34:467-475.

14  
15  
16  
17 51. Colle HA, Reid GB. Context effects in subjective mental workload ratings. *Hum*  
18 *factors*. 1998; 40: 591-600.



# Reporting checklist for cross sectional study.

Based on the STROBE cross sectional guidelines.

## Instructions to authors

Complete this checklist by entering the page numbers from your manuscript where readers will find each of the items listed below.

Your article may not currently address all the items on the checklist. Please modify your text to include the missing information. If you are certain that an item does not apply, please write "n/a" and provide a short explanation.

Upload your completed checklist as an extra file when you submit to a journal.

In your methods section, say that you used the STROBE cross sectional reporting guidelines, and cite them as:

von Elm E, Altman DG, Egger M, Pocock SJ, Gotsche PC, Vandembroucke JP. The Strengthening the Reporting of Observational Studies in Epidemiology (STROBE) Statement: guidelines for reporting observational studies.

|                           |                     | Reporting Item                                                                                  | Page Number |
|---------------------------|---------------------|-------------------------------------------------------------------------------------------------|-------------|
| <b>Title and abstract</b> |                     |                                                                                                 |             |
| Title                     | <a href="#">#1a</a> | Indicate the study's design with a commonly used term in the title or the abstract              | 1           |
| Abstract                  | <a href="#">#1b</a> | Provide in the abstract an informative and balanced summary of what was done and what was found | 2           |
| <b>Introduction</b>       |                     |                                                                                                 |             |
| Background / rationale    | <a href="#">#2</a>  | Explain the scientific background and rationale for the investigation being reported            | 3-4         |
| Objectives                | <a href="#">#3</a>  | State specific objectives, including any prespecified hypotheses                                | 5           |
| <b>Methods</b>            |                     |                                                                                                 |             |

|    |                      |                      |                                                                   |      |
|----|----------------------|----------------------|-------------------------------------------------------------------|------|
| 1  | Study design         | <a href="#">#4</a>   | Present key elements of study design early in the paper           | 5    |
| 2  |                      |                      |                                                                   |      |
| 3  | Setting              | <a href="#">#5</a>   | Describe the setting, locations, and relevant dates, including    | 6-7  |
| 4  |                      |                      | periods of recruitment, exposure, follow-up, and data collection  |      |
| 5  |                      |                      |                                                                   |      |
| 6  |                      |                      |                                                                   |      |
| 7  | Eligibility criteria | <a href="#">#6a</a>  | Give the eligibility criteria, and the sources and methods of     | 7    |
| 8  |                      |                      | selection of participants.                                        |      |
| 9  |                      |                      |                                                                   |      |
| 10 |                      |                      |                                                                   |      |
| 11 |                      | <a href="#">#7</a>   | Clearly define all outcomes, exposures, predictors, potential     | 9-10 |
| 12 |                      |                      | confounders, and effect modifiers. Give diagnostic criteria, if   |      |
| 13 |                      |                      | applicable                                                        |      |
| 14 |                      |                      |                                                                   |      |
| 15 |                      |                      |                                                                   |      |
| 16 | Data sources /       | <a href="#">#8</a>   | For each variable of interest give sources of data and details of | n/a  |
| 17 | measurement          |                      | methods of assessment (measurement). Describe                     |      |
| 18 |                      |                      | comparability of assessment methods if there is more than one     |      |
| 19 |                      |                      | group. Give information separately for for exposed and            |      |
| 20 |                      |                      | unexposed groups if applicable.                                   |      |
| 21 |                      |                      |                                                                   |      |
| 22 |                      |                      |                                                                   |      |
| 23 |                      |                      |                                                                   |      |
| 24 | Bias                 | <a href="#">#9</a>   | Describe any efforts to address potential sources of bias         | 17   |
| 25 |                      |                      |                                                                   |      |
| 26 |                      |                      |                                                                   |      |
| 27 | Study size           | <a href="#">#10</a>  | Explain how the study size was arrived at                         | 7    |
| 28 |                      |                      |                                                                   |      |
| 29 | Quantitative         | <a href="#">#11</a>  | Explain how quantitative variables were handled in the            | n/a  |
| 30 | variables            |                      | analyses. If applicable, describe which groupings were chosen,    |      |
| 31 |                      |                      | and why                                                           |      |
| 32 |                      |                      |                                                                   |      |
| 33 |                      |                      |                                                                   |      |
| 34 | Statistical          | <a href="#">#12a</a> | Describe all statistical methods, including those used to control | 9-10 |
| 35 | methods              |                      | for confounding                                                   |      |
| 36 |                      |                      |                                                                   |      |
| 37 |                      |                      |                                                                   |      |
| 38 | Statistical          | <a href="#">#12b</a> | Describe any methods used to examine subgroups and                | n/a  |
| 39 | methods              |                      | interactions                                                      |      |
| 40 |                      |                      |                                                                   |      |
| 41 |                      |                      |                                                                   |      |
| 42 | Statistical          | <a href="#">#12c</a> | Explain how missing data were addressed                           | 7    |
| 43 | methods              |                      |                                                                   |      |
| 44 |                      |                      |                                                                   |      |
| 45 |                      |                      |                                                                   |      |
| 46 | Statistical          | <a href="#">#12d</a> | If applicable, describe analytical methods taking account of      | 9-10 |
| 47 | methods              |                      | sampling strategy                                                 |      |
| 48 |                      |                      |                                                                   |      |
| 49 |                      |                      |                                                                   |      |
| 50 | Statistical          | <a href="#">#12e</a> | Describe any sensitivity analyses                                 | n/a  |
| 51 | methods              |                      |                                                                   |      |
| 52 |                      |                      |                                                                   |      |
| 53 |                      |                      |                                                                   |      |
| 54 | <b>Results</b>       |                      |                                                                   |      |
| 55 |                      |                      |                                                                   |      |
| 56 | Participants         | <a href="#">#13a</a> | Report numbers of individuals at each stage of study—eg           | 6-7  |
| 57 |                      |                      | numbers potentially eligible, examined for eligibility, confirmed |      |
| 58 |                      |                      |                                                                   |      |
| 59 |                      |                      |                                                                   |      |
| 60 |                      |                      |                                                                   |      |

eligible, included in the study, completing follow-up, and analysed. Give information separately for for exposed and unexposed groups if applicable.

|    |                   |                      |                                                                                                                                                                                                                   |       |
|----|-------------------|----------------------|-------------------------------------------------------------------------------------------------------------------------------------------------------------------------------------------------------------------|-------|
| 1  |                   |                      |                                                                                                                                                                                                                   |       |
| 2  |                   |                      |                                                                                                                                                                                                                   |       |
| 3  |                   |                      |                                                                                                                                                                                                                   |       |
| 4  |                   |                      |                                                                                                                                                                                                                   |       |
| 5  | Participants      | <a href="#">#13b</a> | Give reasons for non-participation at each stage                                                                                                                                                                  | n/a   |
| 6  |                   |                      |                                                                                                                                                                                                                   |       |
| 7  | Participants      | <a href="#">#13c</a> | Consider use of a flow diagram                                                                                                                                                                                    | n/a   |
| 8  |                   |                      |                                                                                                                                                                                                                   |       |
| 9  |                   |                      |                                                                                                                                                                                                                   |       |
| 10 | Descriptive data  | <a href="#">#14a</a> | Give characteristics of study participants (eg demographic, clinical, social) and information on exposures and potential confounders. Give information separately for exposed and unexposed groups if applicable. | 11    |
| 11 |                   |                      |                                                                                                                                                                                                                   |       |
| 12 |                   |                      |                                                                                                                                                                                                                   |       |
| 13 |                   |                      |                                                                                                                                                                                                                   |       |
| 14 |                   |                      |                                                                                                                                                                                                                   |       |
| 15 |                   |                      |                                                                                                                                                                                                                   |       |
| 16 |                   |                      |                                                                                                                                                                                                                   |       |
| 17 | Descriptive data  | <a href="#">#14b</a> | Indicate number of participants with missing data for each variable of interest                                                                                                                                   | 7     |
| 18 |                   |                      |                                                                                                                                                                                                                   |       |
| 19 |                   |                      |                                                                                                                                                                                                                   |       |
| 20 |                   |                      |                                                                                                                                                                                                                   |       |
| 21 | Outcome data      | <a href="#">#15</a>  | Report numbers of outcome events or summary measures. Give information separately for exposed and unexposed groups if applicable.                                                                                 | 12-15 |
| 22 |                   |                      |                                                                                                                                                                                                                   |       |
| 23 |                   |                      |                                                                                                                                                                                                                   |       |
| 24 |                   |                      |                                                                                                                                                                                                                   |       |
| 25 |                   |                      |                                                                                                                                                                                                                   |       |
| 26 | Main results      | <a href="#">#16a</a> | Give unadjusted estimates and, if applicable, confounder-adjusted estimates and their precision (eg, 95% confidence interval). Make clear which confounders were adjusted for and why they were included          | n/a   |
| 27 |                   |                      |                                                                                                                                                                                                                   |       |
| 28 |                   |                      |                                                                                                                                                                                                                   |       |
| 29 |                   |                      |                                                                                                                                                                                                                   |       |
| 30 |                   |                      |                                                                                                                                                                                                                   |       |
| 31 |                   |                      |                                                                                                                                                                                                                   |       |
| 32 |                   |                      |                                                                                                                                                                                                                   |       |
| 33 | Main results      | <a href="#">#16b</a> | Report category boundaries when continuous variables were categorized                                                                                                                                             | n/a   |
| 34 |                   |                      |                                                                                                                                                                                                                   |       |
| 35 |                   |                      |                                                                                                                                                                                                                   |       |
| 36 |                   |                      |                                                                                                                                                                                                                   |       |
| 37 | Main results      | <a href="#">#16c</a> | If relevant, consider translating estimates of relative risk into absolute risk for a meaningful time period                                                                                                      | n/a   |
| 38 |                   |                      |                                                                                                                                                                                                                   |       |
| 39 |                   |                      |                                                                                                                                                                                                                   |       |
| 40 |                   |                      |                                                                                                                                                                                                                   |       |
| 41 | Other analyses    | <a href="#">#17</a>  | Report other analyses done—e.g., analyses of subgroups and interactions, and sensitivity analyses                                                                                                                 | n/a   |
| 42 |                   |                      |                                                                                                                                                                                                                   |       |
| 43 |                   |                      |                                                                                                                                                                                                                   |       |
| 44 | <b>Discussion</b> |                      |                                                                                                                                                                                                                   |       |
| 45 |                   |                      |                                                                                                                                                                                                                   |       |
| 46 | Key results       | <a href="#">#18</a>  | Summarise key results with reference to study objectives                                                                                                                                                          | 15-16 |
| 47 |                   |                      |                                                                                                                                                                                                                   |       |
| 48 |                   |                      |                                                                                                                                                                                                                   |       |
| 49 | Limitations       | <a href="#">#19</a>  | Discuss limitations of the study, taking into account sources of potential bias or imprecision. Discuss both direction and magnitude of any potential bias.                                                       | 17-18 |
| 50 |                   |                      |                                                                                                                                                                                                                   |       |
| 51 |                   |                      |                                                                                                                                                                                                                   |       |
| 52 |                   |                      |                                                                                                                                                                                                                   |       |
| 53 |                   |                      |                                                                                                                                                                                                                   |       |
| 54 | Interpretation    | <a href="#">#20</a>  | Give a cautious overall interpretation considering objectives, limitations, multiplicity of analyses, results from similar studies, and other relevant evidence.                                                  | 17    |
| 55 |                   |                      |                                                                                                                                                                                                                   |       |
| 56 |                   |                      |                                                                                                                                                                                                                   |       |
| 57 |                   |                      |                                                                                                                                                                                                                   |       |
| 58 |                   |                      |                                                                                                                                                                                                                   |       |
| 59 |                   |                      |                                                                                                                                                                                                                   |       |
| 60 |                   |                      |                                                                                                                                                                                                                   |       |

1 Generalisability [#21](#) Discuss the generalisability (external validity) of the study 18  
2 results  
3

4  
5 **Other**  
6 **Information**  
7

8  
9 Funding [#22](#) Give the source of funding and the role of the funders for the 19  
10 present study and, if applicable, for the original study on which  
11 the present article is based  
12

13  
14 None The STROBE checklist is distributed under the terms of the Creative Commons Attribution  
15 License CC-BY. This checklist can be completed online using <https://www.goodreports.org/>, a tool  
16 made by the [EQUATOR Network](#) in collaboration with [Penelope.ai](#)  
17  
18  
19  
20  
21  
22  
23  
24  
25  
26  
27  
28  
29  
30  
31  
32  
33  
34  
35  
36  
37  
38  
39  
40  
41  
42  
43  
44  
45  
46  
47  
48  
49  
50  
51  
52  
53  
54  
55  
56  
57  
58  
59  
60

# BMJ Open

## Physician Mental Workload Scale in China: Development and Psychometric Evaluation

|                                 |                                                                                                                                                                                                                                                                                                                                                                                                                                                                                                                                                                                                                                                                                                                                                                                                                                                                                                                                                                               |
|---------------------------------|-------------------------------------------------------------------------------------------------------------------------------------------------------------------------------------------------------------------------------------------------------------------------------------------------------------------------------------------------------------------------------------------------------------------------------------------------------------------------------------------------------------------------------------------------------------------------------------------------------------------------------------------------------------------------------------------------------------------------------------------------------------------------------------------------------------------------------------------------------------------------------------------------------------------------------------------------------------------------------|
| Journal:                        | <i>BMJ Open</i>                                                                                                                                                                                                                                                                                                                                                                                                                                                                                                                                                                                                                                                                                                                                                                                                                                                                                                                                                               |
| Manuscript ID                   | bmjopen-2019-030137.R2                                                                                                                                                                                                                                                                                                                                                                                                                                                                                                                                                                                                                                                                                                                                                                                                                                                                                                                                                        |
| Article Type:                   | Original research                                                                                                                                                                                                                                                                                                                                                                                                                                                                                                                                                                                                                                                                                                                                                                                                                                                                                                                                                             |
| Date Submitted by the Author:   | 07-Aug-2019                                                                                                                                                                                                                                                                                                                                                                                                                                                                                                                                                                                                                                                                                                                                                                                                                                                                                                                                                                   |
| Complete List of Authors:       | Lu, Chuntao; Huazhong University of Science and Technology Tongji Medical College, School of Medicine and Health Management; Jingchu University of Technology Affiliated Central Hospital<br>Hu, Yinhan; Huazhong University of Science and Technology Tongji Medical College, School of Medicine and Health Management<br>Fu, Qiang; Saint Louis University, College for Public Health and Social Justice, Department of Epidemiology and Biostatistics<br>Governor, Samuel ; Saint Louis University, College for Public Health and Social Justice, Department of Epidemiology and Biostatistics<br>Wang, Liuming; Huazhong University of Science and Technology Tongji Medical College, Tongji Hospital<br>Li, Chao; Jingchu University of Technology Affiliated Central Hospital<br>Deng, Lu; Huazhong University of Science and Technology Tongji Medical College, School of Medicine and Health Management<br>Xie, Jinzhu; The Third People's Hospital of Hubei Province |
| <b>Primary Subject Heading</b>: | Mental health                                                                                                                                                                                                                                                                                                                                                                                                                                                                                                                                                                                                                                                                                                                                                                                                                                                                                                                                                                 |
| Secondary Subject Heading:      | Mental health                                                                                                                                                                                                                                                                                                                                                                                                                                                                                                                                                                                                                                                                                                                                                                                                                                                                                                                                                                 |
| Keywords:                       | Physician, MENTAL HEALTH, Workload, Survey and Questionnaires, Hospitals, Public                                                                                                                                                                                                                                                                                                                                                                                                                                                                                                                                                                                                                                                                                                                                                                                                                                                                                              |
|                                 |                                                                                                                                                                                                                                                                                                                                                                                                                                                                                                                                                                                                                                                                                                                                                                                                                                                                                                                                                                               |

SCHOLARONE™  
Manuscripts

**Title page**

Physician Mental Workload Scale in China: Development and Psychometric Evaluation

Chuntao Lu Yinhuan Hu\* Qiang Fu Samuel Governor Liuming Wang Chao Li Lu Deng

Jinzhu Xie

Corresponding author:

\*Yinhuan Hu

Address: No.13 Hangkong Rd., Wuhan, Hubei 430030, P.R. China

Email: [hyh288@hotmail.com](mailto:hyh288@hotmail.com)

Telephone number: 13554285879

Co-author:

**Chuntao Lu:** 1.School of Medicine and Health Management, Tongji Medical College, Huazhong University of Science and Technology, No.13 Hangkong Rd., Wuhan, Hubei 430030, P.R. China.

2. Jingchu University of Technology Affiliated Central Hospital, No.39 Xiangshan Rd., Jingmen, Hubei 448126, P.R. China

**Yinhuan Hu:** School of Medicine and Health Management, Tongji Medical College, Huazhong University of Science and Technology, No.13 Hangkong Rd., Wuhan, Hubei 430030, P.R. China

**Qiang Fu:** Department of Epidemiology and Biostatistics, College for Public Health and Social Justice, Saint Louis University, Missouri, MO, United States

**Samuel Governor:** Department of Epidemiology and Biostatistics, College for Public

1  
2  
3  
4 Health and Social Justice, Saint Louis University, Missouri, MO, United States  
5

6 **Liuming Wang:** Tongji Hospital, Tongji Medical College of Huazhong University of  
7  
8  
9 Science and Technology, No.1095 Jiefang Rd., Wuhan, Hubei 430030, P.R. China  
10

11 **Chao Li:** Jingchu University of Technology Affiliated Central Hospital. No.39 Xiangshan  
12  
13  
14 Rd., Jingmen, Hubei 448126, P.R. China  
15

16  
17 **Lu Deng :** School of Medicine and Health Management, Tongji Medical College,  
18  
19 Huazhong University of Science and Technology, No.13 Hangkong Rd., Wuhan, Hubei  
20  
21  
22 430030, P.R. China  
23

24 **Jinzhu Xie:** The Third People's Hospital of Hubei Province, No.26 Zhongshan Rd.,  
25  
26  
27 Wuhan, Hubei 430030, P.R. China.  
28  
29  
30  
31  
32  
33  
34  
35  
36  
37  
38  
39  
40  
41  
42  
43  
44  
45  
46  
47  
48  
49  
50  
51  
52  
53  
54  
55  
56  
57  
58  
59  
60

## Abstract

**Objective:** The purpose of our study is to develop and perform reliability and validity assessments of mental workload scale for physicians in China.

**Design:** Three phases, involving 396 physicians from different-level of comprehensive public hospitals in China, were conducted to develop the instrument. In the first phase, an initial item pool was developed through a systematic literature review. The second phase consisted of two rounds of Delphi expert consultations and a pilot survey. The third phase tested the reliability and validity of the instrument.

**Setting:** Public hospitals in China.

**Participants:** A total of 396 physicians from different tiers of comprehensive public hospitals in China participated in this study in 2018.

**Primary and secondary outcome measures:** Cronbach's alpha, content validity index, the correlation coefficient between items and dimensions, and indices of confirmatory factor analysis.

**Results:** Six dimensions (mental demands, physical demands, temporal demands, perceived risk, frustration level, and performance), and twelve items were identified in the instrument. For reliability, Cronbach's  $\alpha$  for the whole scale was 0.81. For validity, the corrected item-content validity index of each item ranged from 0.85 to 1, and correlation coefficients between dimensions and total scores had a range of 0.37-0.72. The results of the confirmatory factor analysis showed that the goodness of indices of the scale was reasonably well.

**Conclusion:** The instrument showed good reliability and validity, and it is useful for



1  
2  
3  
4 diagnosing the mental workload of physicians.  
5

6 **Keywords:** Physician; Mental Health; Workload; Survey and Questionnaires; Hospitals,  
7  
8  
9 Public  
10

## 11 12 13 14 **Article Summary**

### 15 16 17 **Strengths and limitations of this study**

18  
19 This is the first study to develop a measurement about physician mental workload  
20  
21 from a subjective perspective in China.  
22

23  
24 Qualitative and quantitative methods were involved in item selection.  
25

26  
27 There is a potential reporting bias in the self-reported measurements of the workload  
28  
29 among physicians.  
30

31  
32 There existed a selection bias due to all respondents voluntarily rather than randomly  
33  
34 took part in the survey.  
35

36  
37 Among six dimensions, perceived risk only included one item, which may result in  
38  
39 measurement error.  
40  
41  
42  
43  
44  
45  
46  
47  
48  
49  
50  
51  
52  
53  
54  
55  
56  
57  
58  
59  
60

## Introduction

Internationally, there has been a focus on the relationship between physicians' workload and their health. <sup>1</sup> Physicians' health is highly associated with the workload. <sup>2</sup> Excessive workload impacts physician's health <sup>3-4</sup> and increases the risk of work-related musculoskeletal disorders (MSDs). <sup>5-6</sup> Exposure to workload is related to adverse effects in medical errors <sup>7</sup> and adverse incidents. <sup>8</sup> Physician workload could be a negatively contributing factor to patients' perceived quality of care, <sup>9</sup> and affects patient satisfaction <sup>10</sup> and safety. <sup>11-12</sup> It is possible that these stressors have reached a point where they pose a severe problem for the entire healthcare system. <sup>13</sup> Thus, the unreasonable and overwhelming workload has adverse effects on physicians, patients, and healthcare organizations. <sup>14</sup>

The workload is thought to be multidimensional and multifaceted. <sup>15</sup> One aspect of workload includes the subjective psychological experiences of the human operator. <sup>16</sup> Mental workload as a kind of workload has emerged as one of the most critical occupational risk factors, which results in burnout or anxiety. <sup>17</sup> Lack of control over workload was expected to correlate most highly with burnout. <sup>18,19</sup> Heavy mental workload can lead to serious health problems (cardiovascular diseases, digestive problems, etc.) for physicians as well. <sup>17</sup> Meanwhile, the excessive mental workload can also lead to an inferior quality of care service. <sup>20</sup> Currently, The European Pact for Mental Health and Welfare is conducting mental workload assessments to promote physical and mental wellbeing. <sup>21</sup>

Different tools have been proposed to assess mental workload. Previous research

1  
2  
3  
4 has established a brief instrument with six items to measure physician mental  
5  
6 workload.<sup>22</sup> The NASA-Task Load Index (NASA-TLX) scale, which was widely used in  
7  
8 measuring mental workload<sup>23</sup> has proven to be a sensitive, valid, and reliable  
9  
10 instrument<sup>24</sup> and can be used in human factors research.<sup>25</sup> The researcher has  
11  
12 localized it as a 29-item questionnaire in Spain to measure workers' mental workload.  
13  
14  
15  
16  
17  
18  
19  
20  
21  
22  
23  
24  
25  
26  
27  
28  
29  
30  
31  
32  
33  
34  
35  
36  
37  
38  
39  
40  
41  
42  
43  
44  
45  
46  
47  
48  
49  
50  
51  
52  
53  
54  
55  
56  
57  
58  
59  
60

26 The existing body of research on NASA-TLX suggested that it could be used to measure nurse workload in health care settings.<sup>27-29</sup> In the same vein, the Subjective Workload Assessment Technique (SWAT) is a subjective rating technique with three dimensions of time load, mental effort load, and psychological stress load, which is used to assess mental workload as well.<sup>30</sup> It has been successfully applied in the mental workload assessment of several aircraft multitask conditions, such as assessing the mental workload of different systems of air defense.<sup>24</sup> Copenhagen Psychosocial Questionnaire was a wide-spread tool used in the industrial or the branch of the service in Europe, which included the main dimensions of the most influential psychosocial theories at work.<sup>31</sup> Together these tools provide essential insights into workload measurement in health care management, especially in nurse workload measurement. However, there is still different workload between physicians and nurses essentially, meanwhile, these measurements were designed for other workers, so we do not ensure these tool can be directly used in physician mental workload measurement. Specifically, mental workload measurement needs to be developed for physicians.

With the increasing of patient demands for health, physicians tend to have a

1  
2  
3  
4 heavier workload, worse physical health, more mental strain, and more intense  
5  
6 relationships with patients in China.<sup>32</sup> Data from several studies suggest that most  
7  
8 physicians work more than 10 hours a day<sup>33</sup> to manage outpatients and inpatients.  
9  
10 On average, a physician in a tertiary hospital is responsible for 8.10 outpatients and  
11  
12 2.70 beds per day.<sup>32</sup> However, they even have been abused, injured, and in extreme  
13  
14 cases, murdered by patients or their relatives in hospitals across China,<sup>34</sup> which  
15  
16 resulted in extremely mental workload. Establishing the workload measurement  
17  
18 system for medical personnel has been incorporated into Chinese Patient Safety Goals  
19  
20 by the Chinese Hospital Association.<sup>35</sup>  
21  
22  
23  
24  
25

26  
27 Existing researches about workload measurement instruments are concentrated  
28  
29 on objective workload in China, for example, the measurement of work time. Whereas  
30  
31 physicians' mental workload is an indispensable problem, there are few instruments  
32  
33 exploring physician mental workload in China. The purpose of this paper is to develop  
34  
35 a scientific mental workload instrument, which can be used to measure or assess the  
36  
37 actual mental workload of physicians.  
38  
39  
40  
41  
42  
43  
44  
45  
46  
47

## 48 **Methods**

### 49 **Study design**

50  
51  
52  
53  
54 The instrument was developed in three phases. In the first phase, an initial item  
55  
56 pool was developed by integrating previous studies through a systematic literature  
57  
58 review. The second phase consisted of two rounds of Delphi expert consultations and  
59  
60

1  
2  
3  
4 a pilot survey in 2017. The third phase was testing the psychometric properties of the  
5  
6 instrument, including its reliability and validity, through a study conducted in 2018 in  
7  
8 comprehensive public hospitals in China.  
9

### 10 11 12 **Framework and items of generation and selection**

13  
14  
15  
16 Based on the framework of NASA-TLX and SWAT, we combined the current  
17  
18 situation of Chinese physicians' workload to determine the item pool. Six dimensions  
19  
20 and fifteen items were sent to 20 experts (including physicians, hospital managers,  
21  
22 researchers, and human resource managers) for consultation. According to two-round  
23  
24 expert consultation, we deleted four items, added a new item (the intensity of physical  
25  
26 activities), and revised the description of all the items. Then, there were six dimensions  
27  
28 (physical demands, mental demands, temporal demands, effort, frustration level, and  
29  
30 performance) and twelve items, which consisted of the pre-scale with a range from 0  
31  
32 to 100.  
33  
34  
35  
36  
37  
38  
39

40 In the pre-survey analysis, we selected three hospitals (one tertiary hospital, one  
41  
42 secondary hospital, and one first-tier hospital) through conveniently sampling. A  
43  
44 sample of 80 physicians was surveyed with a web-based scale during November and  
45  
46 December 2017. Finally, 74 samples were validated to conduct item selection. Items  
47  
48 were refined based on the following indexes or methods: critical ratio (CR), coefficient  
49  
50 of variation (CV), correlation analysis,<sup>36</sup> Cronbach's  $\alpha$ ,<sup>37</sup> and exploratory factor  
51  
52 analysis (EFA).<sup>38</sup>  
53  
54  
55  
56  
57

58 If an item was eliminated by any of the above methods, then the item was  
59  
60

1  
2  
3  
4 deleted or revised. The final scale consisted of six dimensions (mental demands,  
5  
6 physical demands, temporal demands, perceived risk, frustration level, and  
7  
8 performance), and twelve items (Table 1).  
9  
10

### 11 12 **Data collection for testing the validity and reliability of the scale**

13  
14  
15  
16 To check the validity and reliability of the developed scale, we planned to survey  
17  
18 400 respondents (physicians are working in hospitals) from different tier hospitals  
19  
20 (two tertiary hospitals, two secondary hospitals, and two first-tier hospitals). These  
21  
22 hospitals were randomly selected from Hubei province, China. We used a website--  
23  
24 wenjuanxing (www.wjx.cn), which is a widely used platform to conduct surveys in  
25  
26 China, to develop an electronic questionnaire to survey physicians. The electronic  
27  
28 questionnaire is a kind of access code or website, and respondents can scan the access  
29  
30 code or click the website by their phones to complete the questionnaire. We sent the  
31  
32 access code or website to the human resources at each participating hospital. Then,  
33  
34 human resources sent the access code to the physicians' online communication group  
35  
36 at each hospital. Three hundred ninety-six physicians voluntarily participated in the  
37  
38 survey before March 2018; finally, 11 invalid samples were deleted.  
39  
40  
41  
42  
43  
44  
45  
46  
47

48 There was a detailed description of the guidance of the scale, which showed that  
49  
50 our scale was anonymous, and all physicians were voluntary to answer this question.  
51  
52 Meanwhile, we described that our survey aimed to develop a physician mental  
53  
54 workload scale, so the results would not be used for other purposes. The physician  
55  
56 mental workload scale included three parts. The first part of the scale included twelve  
57  
58  
59  
60

1  
2  
3  
4 items, and respondents need to score them one by one. The second part was a table  
5  
6 which included 15 pairs in our scale, which was used to collect the weights of each  
7  
8 dimension. Every two dimensions formed a pair (e.g., Mental demands vs. Physical  
9  
10 demands, Mental demands vs. Temporal demands, etc.). Thus, there were fifteen  
11  
12 pairs the respondents needed to select from. The respondents need to choose a  
13  
14 dimension which was contributed more to their workload in each pair. Then, the  
15  
16 weight of each dimension was equal to the number of times that dimension was  
17  
18 selected divided by fifteen. The third part of the scale was the individual information  
19  
20 about the physicians.  
21  
22  
23  
24  
25

26  
27 The response endpoints of items are displayed in Table 1. Items were scored as  
28  
29 follows: 0, 10, 20, 30, 40, 50, 60, 70, 80, 90, 100, the average scores of all items for a  
30  
31 corresponding dimension were multiplied by the dimension weight to produce the  
32  
33 dimension scores, and then the total scores were the sum of all dimension scores.  
34  
35  
36  
37

38 Table 1 Dimensions and items of physician mental workload scale

| Dimensions and item                                                                                                                                                 | Endpoints (0-100)                                                                                                                                        |
|---------------------------------------------------------------------------------------------------------------------------------------------------------------------|----------------------------------------------------------------------------------------------------------------------------------------------------------|
| <b>A Mental demands</b>                                                                                                                                             |                                                                                                                                                          |
| A1 How demanding of cognitive activities (e.g., sensation, perception, remembering, thinking, calculating, attention, etc.) were required during your medical work? | no workload <span style="float: right;">heaviest workload</span><br>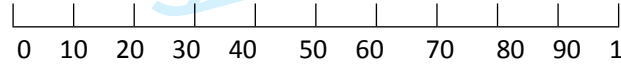 |
| A2 How demanding of emotion and feeling were input (e.g., empathy, sympathy, enthusiasm, negative emotion restraining, etc.) during your medical work?              | no workload <span style="float: right;">heaviest workload</span><br> |
| A3 How hard did you have to work to overcome difficulties in accomplishing your medical work?                                                                       | no workload <span style="float: right;">heaviest workload</span><br> |
| <b>B Physical demands</b>                                                                                                                                           |                                                                                                                                                          |
| B1 How demanding of physical activities were                                                                                                                        | no workload <span style="float: right;">heaviest workload</span><br> |

required (e.g., standing, stationary, controlling, repetitive action, etc.) in your medical work?

0 10 20 30 40 50 60 70 80 90 100

B2 How intensive was the physical activity during your medical work? (Was the work restful or laborious?)

no workload heaviest workload  
  
 0 10 20 30 40 50 60 70 80 90 100

### C Temporal demands

C1 How pressured did you feel about work time in your medical work? (Daily medical work required time was more/less than available time?)

no workload heaviest workload  
  
 0 10 20 30 40 50 60 70 80 90 100

C2 How frequently did you have to complete multiple tasks at the same time (work overlap) in your medical work?

no workload heaviest workload  
  
 0 10 20 30 40 50 60 70 80 90 100

### D Perceived risk

D1 How risky did you perceive (e.g., medical dispute, etc.) in your medical work?

no workload heaviest workload  
  
 0 10 20 30 40 50 60 70 80 90 100

### E Frustration level

E1 How depressed or frustrated did you feel in your medical work?

no workload heaviest workload  
  
 0 10 20 30 40 50 60 70 80 90 100

E2 How anxious or irritated did you feel in your medical work?

no workload heaviest workload  
  
 0 10 20 30 40 50 60 70 80 90 100

### F Performance

F1 How successfully do you think you were in accomplishing the goals in your medical work?

heaviest workload no workload  
  
 0 10 20 30 40 50 60 70 80 90 100

F2 How satisfied were you with the outcome in your medical work?

heaviest workload no workload  
  
 0 10 20 30 40 50 60 70 80 90 100

## Statistical analysis

Descriptive statistics were used to show the characteristics of the respondents, including gender, age, educational level (i.e. Ph.D. degree, Master degree, Undergraduate), job title (i.e. senior, middle, junior), work years, hospital-level (i.e. tertiary hospitals, secondary hospitals, first-tier hospital), work hours per week, number of outpatients serviced per day, and self-perceived health status.



1  
2  
3  
4 For the reliability of the scale, Cronbach's alpha was used to assess the internal  
5  
6 consistency of each instrument component. Values of 0.70 or higher for Cronbach's  
7  
8 alpha were considered acceptable.<sup>37</sup>  
9  
10

11 Content validity index (CVI) of each item was calculated to assess the accuracy of  
12  
13 the scale using the scores of 1-4. Experts were invited to evaluate the items with a  
14  
15 scale of 1 representing the item not relevant to corresponding dimension and 4  
16  
17 representing the item closely related to the corresponding dimension. Corrected item-  
18  
19 content validity index (I-CVI) and average scale-content validity index (S-CVI/Ave) were  
20  
21 calculated. Corrected I-CVI of 0.78 or higher and S-CVI/Ave of 0.90 or greater were  
22  
23 considered acceptable.<sup>39</sup>  
24  
25  
26  
27  
28  
29

30 The test of construct validity was tested by correlation coefficient method,  
31  
32 exploratory factor analysis, and confirmatory factor analysis. Items whose values for  
33  
34 item-total correlation and dimension-total correlation below 0.40 were revised or  
35  
36 removed from the scale. A Bartlett's test of sphericity scores lower than 0.05 and a  
37  
38 Kaiser-Meyer-Olkin (KMO) measure of sampling adequacy higher than 0.70 and closer  
39  
40 to 1 were considered appropriate for factor analysis.<sup>40</sup> Exploratory factor analysis and  
41  
42 confirmatory factor analysis were used to explore and confirm the structure of the  
43  
44 scale. For the exploratory factor analysis, we used a varimax rotated method to  
45  
46 examine whether the structure matched the framework. For the confirmatory factor  
47  
48 analysis, the criterion of model fit indices were listed as follows:  $\chi^2/df < 3$ ; root mean  
49  
50 square error of approximation (RMSEA)  $< 0.05$ ; root of mean square residual  
51  
52 (RMR)  $< 0.05$ ; goodness of fit (GFI)  $> 0.90$ , comparative fit index (CFI)  $> 0.90$ , Tucker-  
53  
54  
55  
56  
57  
58  
59  
60

Lewis index (TLI)>0.90. <sup>41</sup>Statistical analyses were performed with SPSS V. 21 (IBM Corp., Armonk, NY, USA) and AMOS V.17 (IBM Corp., Armonk, NY, USA).

### Patient and public involvement

Our participants were physicians working in hospitals. They took part in the pre-survey and formal survey to complete our scale. All participants were voluntary, and no incentives were provided for their participation. Meanwhile, Participants were not directly involved in the design and recruitment of this study. The results were not provided back to participants.

## Results

### Sample characteristics

Three hundred ninety-six responses (online survey) were received, and 11 questionnaires were excluded due to incomplete demographic information. There were no issues about floor or ceiling effects as questions to every item were responded as required in the form of a web-based survey. The characteristics of the participants are presented in Table 2.

Table 2 Respondents' characteristic of samples

| Variable      | Valid sample | Percentage (%) |
|---------------|--------------|----------------|
| <b>Gender</b> |              |                |
| Male          | 200          | 51.9           |
| Female        | 185          | 48.1           |
| <b>Age</b>    |              |                |
| <45           | 258          | 67.0           |

| Variable                                         | Valid sample | Percentage (%) |
|--------------------------------------------------|--------------|----------------|
| 45-55                                            | 121          | 31.4           |
| >55                                              | 6            | 1.6            |
| <b>Educational level</b>                         |              |                |
| Ph.D. degree                                     | 36           | 9.4            |
| Master degree                                    | 48           | 12.5           |
| Bachelor degree                                  | 184          | 47.8           |
| Below bachelor college                           | 117          | 30.3           |
| <b>Job title</b>                                 |              |                |
| Senior title                                     | 83           | 21.6           |
| Middle title                                     | 146          | 37.9           |
| Junior title                                     | 156          | 40.5           |
| <b>Work years in his/her institutions (year)</b> |              |                |
| 1-5                                              | 122          | 31.7           |
| 6-10                                             | 91           | 23.6           |
| 11-15                                            | 58           | 15.1           |
| >=16                                             | 114          | 29.6           |
| <b>Hospital level</b>                            |              |                |
| Tertiary hospitals                               | 130          | 33.8           |
| Secondary hospitals                              | 124          | 32.2           |
| First-tier hospitals                             | 131          | 34.0           |
| <b>Work hours per week</b>                       |              |                |
| <=40                                             | 73           | 19.0           |
| 41-60                                            | 152          | 39.5           |
| >60                                              | 160          | 41.5           |
| <b>Number of outpatients serviced per day</b>    |              |                |
| <20                                              | 135          | 35.1           |
| 20-50                                            | 171          | 44.4           |
| >50                                              | 79           | 20.5           |
| <b>Self-perceived health status</b>              |              |                |
| Poor                                             | 65           | 16.9           |
| Fair                                             | 242          | 62.9           |
| Good                                             | 78           | 20.2           |

### Reliability of physician mental workload scale

Each of the six components demonstrated at least satisfactory internal consistency higher than 0.70, with Cronbach's  $\alpha$  in the range of 0.70-0.90. Cronbach's  $\alpha$  for the whole scale was up to 0.81, which indicated that the scale has excellent

reliability.

### The validity of physician mental workload scale

The corrected I-CVI of each item ranged from 0.85-1 (Table 3), which is higher than 0.78. The S-CVI/Ave was 0.96, which is higher than 0.90. All of these showed good content validity of the scale.

The correlation matrix between items and total scores were inspected to confirm the convergent validity, which was indicated by reasonable coefficients of 0.40 and above, except for F1 and F2 (Table 3). Calculated correlation coefficients between dimensions and total scores had a range of 0.37-0.72, which was an additional index that showed dimensions and total scores have good convergent validity. Also, the correlation coefficients among the dimensions were lower than the correlation coefficients between the dimension-total scores, which indicated that the scale has a good discriminant validity (Table 4).

Table 3 Content validity and correlation coefficient of item-total scores of the scale

| Items                             | Corrected I-CVI | Item-total correlations |
|-----------------------------------|-----------------|-------------------------|
| A1 Cognitive activity             | 1               | 0.57                    |
| A2 Emotion and feeling            | 0.85            | 0.57                    |
| A3 Overcoming difficulties        | 0.85            | 0.59                    |
| B1 Physical activity              | 1               | 0.57                    |
| B2 Intensity of physical activity | 1               | 0.65                    |
| C1 Time pressure                  | 1               | 0.69                    |
| C2 Multiple tasks                 | 0.85            | 0.69                    |
| D1 Risk concern                   | 1               | 0.64                    |
| E1 Depressed or frustrated        | 1               | 0.75                    |
| E2 Anxious or irritated           | 1               | 0.75                    |
| F1 Successful                     | 1               | 0.33*                   |
| F2 Satisfied                      | 1               | 0.31*                   |

\*item-total scores were below than 0.4

Table 4 Correlation coefficient matrix between dimensions and total scores of the scale

| Dimensions          | A    | B    | C    | D    | E    | F    | Total scores |
|---------------------|------|------|------|------|------|------|--------------|
| A Mental demands    | 1    |      |      |      |      |      |              |
| B Physical demands  | 0.43 | 1    |      |      |      |      |              |
| C Temporal demands  | 0.52 | 0.47 | 1    |      |      |      |              |
| D Perceived risk    | 0.46 | 0.38 | 0.44 | 1    |      |      |              |
| E Frustration level | 0.40 | 0.36 | 0.54 | 0.51 | 1    |      |              |
| F Performance       | 0.09 | 0.05 | 0.01 | 0.05 | 0.13 | 1    |              |
| Total scores        | 0.61 | 0.52 | 0.68 | 0.68 | 0.72 | 0.37 | 1            |

### Exploratory factor analysis of physician mental workload scale

The KMO sample adequacy measurement was 0.81, which was higher than the recommended value of 0.70, and Bartlett's test of sphericity with Chi-square value 1950.70 and  $p < 0.000$ . Thus, the data was suitable for factor analysis. Considering experts' suggestion, we selected six principal components in the exploratory factor analysis, and results showed that the six-dimensional model explained 81.88% of the total variance (Table 5).

The component 1 "mental demands" was developed from 3 items that asked for feeling or memory requirement, emotional requirement, and the effort input to overcome difficulties, with the factor loading in the range of 0.74-0.81. The component 2 "frustration level" consisted of 2 items that asked about anxiety and level of depression or frustration, and the factor loading was in the range of 0.86-0.88. The component 3 "physical demands" consisted of 2 items that related to strength requirement and the intensity of work time with a factor loading in the range of 0.84-

0.90.

The component 4 “temporal demands” constituted two items that asked about the ratio of required time to available time and frequency of completing multiple tasks, with the factor loading in the range of 0.77-0.82. There were two items in the “performance” component 5, which related to the sense of achievement and job satisfaction regarding work outcome, with the factor loading in the range of 0.85-0.90. The component 6 “perceived risk” included only 1 item that explained the perception of risk in conducting tasks (such as medical dispute and risk of being infectious) with a factor loading of 0.84.

Table 5 Factor loadings for the rotated component matrix: varimax rotated components

| Items                             | Components |      |      |      |      |      |
|-----------------------------------|------------|------|------|------|------|------|
|                                   | 1          | 2    | 3    | 4    | 5    | 6    |
| A2 Emotion and feeling            | 0.81       |      |      |      |      |      |
| A1 Cognitive activity             | 0.76       |      |      |      |      |      |
| A3 Overcoming difficulties        | 0.74       |      |      |      |      |      |
| E1 Depressed or frustrated        |            | 0.88 |      |      |      |      |
| E2 Anxious or irritated           |            | 0.86 |      |      |      |      |
| B1 Physical activity              |            |      | 0.90 |      |      |      |
| B2 Intensity of physical activity |            |      | 0.84 |      |      |      |
| C1 Time pressure                  |            |      |      | 0.82 |      |      |
| C2 Multiple tasks                 |            |      |      | 0.77 |      |      |
| F1 Successful                     |            |      |      |      | 0.90 |      |
| F2 Satisfied                      |            |      |      |      | 0.85 |      |
| D1 Risk concern                   |            |      |      |      |      | 0.84 |

### Confirmatory factor analysis of physician workload scale

The six-factor model obtained after exploratory factor analysis was tested by

1  
2  
3  
4 confirmatory factor analysis using the maximum likelihood estimation method. The  
5  
6 goodness-of-fit model was listed as follows:  $\chi^2/df=1.84 (<3)$ , RMR= 0.04 (<0.05), and  
7  
8 GFI=0.97 (>0.9), CFI=0.98 (>0.9), TLI=0.97 (>0.9), RMSEA=0.05 ( $\leq 0.05$ ). Referring to  
9  
10 the criterion listed above, the model was a good fit for the data.  
11  
12  
13  
14  
15  
16  
17

## 18 Discussion

19  
20  
21 The purpose of this study was to develop a mental workload scale for physicians  
22  
23 and explore the validity and reliability of the scale. According to the results of the tests,  
24  
25 the scale is reliable and valid; hence, it is considered as an effective instrument for  
26  
27 assessing physician mental workload in Chinese comprehensive public hospitals.  
28  
29 Results show a six-dimensional model which includes aspects related to mental  
30  
31 demands, physical demands, temporal demands, perceived risk, frustration level, and  
32  
33 performance. Compared with other relevant scales, this scale only includes 12 items,  
34  
35 which have strength in the aspects of length so that it could be completed in a short  
36  
37 time. As for its contents, the dimensions of perceived risk and temporal demands are  
38  
39 uniquely distinctive for physician mental workload in China.  
40  
41  
42  
43  
44  
45  
46  
47

48 The whole Cronbach's  $\alpha$  of the 12 items was beyond 0.7, which indicated that it  
49  
50 had excellent reliability. For the content validity, the corrected I-CVI was higher than  
51  
52 0.78, and the S-CVI/Ave was more than 0.9, which showed that it had good content  
53  
54 validity. For the construct validity, except for F1 and F2, the correlation coefficient  
55  
56 between item and total scores was more than 0.4, which showed that the construct  
57  
58  
59  
60

1  
2  
3  
4 validity was at a good level. The item-total scores of the two items in the dimension  
5  
6 of performance were near to 0.4, and perhaps, would have been relevant in a reverse  
7  
8 scoring. Consistent with previous research on NASA-TLX, performance dimension  
9  
10 shows a limited practical relevance since variations influence it in physical load.<sup>42</sup>  
11  
12 Other study reported that subjective assessments of mental workload might not  
13  
14 provide an accurate estimation of the performance dimension.<sup>26</sup> Considering this  
15  
16 information, we retained the two items but revised their description.  
17  
18  
19  
20  
21

22 The specific dimension perceived risk, which is a different dimension and not  
23  
24 included in the framework of NASA-TLX and SWAT, is highly associated with physician  
25  
26 mental workload in China. There tends to be an estranged relationship between  
27  
28 physicians and patients, which puts physicians at a dangerous risk of being assaulted,  
29  
30 by patients or visitors in their line of work.<sup>43</sup> According to the statistics, 96% of medical  
31  
32 staff have been abused or injured in 2012.<sup>44</sup> The physician-patient relationship is  
33  
34 becoming more and more fragile and has reached an unprecedented poor level in  
35  
36 China.<sup>45</sup> The tense relationship resulted in heavy psychological workloads during their  
37  
38 work.  
39  
40  
41  
42  
43  
44

45 Another dimension of temporal demands is also entirely specific. The gap  
46  
47 between healthcare demand and supply (thus doctor-patient ratio) in China has  
48  
49 caused physicians in the secondary and tertiary hospital settings to become  
50  
51 overworked.<sup>46</sup> They always need to work overtime, even though they conduct more  
52  
53 than one task at the same time. According to the report by the Chinese Medical  
54  
55 Association in 2018, physicians in tertiary hospitals had an average workweek of 51.05  
56  
57  
58  
59  
60



1  
2  
3  
4 hours, which was more than legal 40 hours per week.<sup>47</sup> Research has reported that  
5  
6 physicians may feel stressed when poor scheduling leaves them pressed for time.<sup>48</sup>  
7  
8  
9 Mental workload encompasses the subjective experience of a given task load.<sup>49</sup> High  
10  
11 task demands require plenty of time and evoke high mental effort and heavy workload  
12  
13 for physicians.<sup>50</sup> Then, the worse the experience of the task load, the higher the  
14  
15  
16  
17 mental workload.<sup>51</sup>

18  
19 Although we have attempted an accurate examination of the measurement  
20  
21 properties of the physician mental workload scale by using qualitative and  
22  
23 quantitative methods, there were still some limitations that merit discussions. Firstly,  
24  
25 among six dimensions, perceived risk only included one item, which may result in  
26  
27 measurement error. Secondly, there was a potential reporting bias in the self-reported  
28  
29 measurements of the workload among physicians. Thirdly, all respondents voluntarily  
30  
31 decided to take part in the survey. Physicians who were overburdened at the time of  
32  
33 the study may not have time to take part in the investigation, which resulted in a  
34  
35 selection bias. Thus, all of these above need continued research to improve this scale.  
36  
37  
38  
39  
40  
41  
42  
43 Meanwhile, burnout was relevant to the mental workload, which was a direction for  
44  
45 further exploration as well.  
46  
47  
48

## 49 **Conclusion**

50  
51  
52  
53 Creating new items from a subjective perspective is of paramount importance in  
54  
55 investigating the Chinese physician's workload. Physician mental workload scale has  
56  
57 acceptable preliminary psychometric properties with six dimensions and twelve items.  
58  
59  
60

1  
2  
3  
4 The use of a physician mental workload scale can help us to find the main stressors in  
5  
6 physician mental workload, and to implement targeted optimization strategies to  
7  
8 mitigate these stressors so that the physical and mental health of physicians can be  
9  
10 enhanced. This, consequently, will help us to improve the quality and efficiency of  
11  
12 healthcare delivery in hospital settings.  
13  
14  
15

### 16 **Abbreviations**

17  
18  
19 CVI: Content Validity Index;

20  
21  
22 RMR: Root of Mean Square Residual; GFI= Good of Fitness Index; CFI= Comparative Fit  
23  
24 Index; TLI=Tucker-Lewis index; CR= Critical Ratio; CV=Coefficient of Variation;

25  
26  
27 NASA-TLX=NASA- Task Load Index; SWAT= Subjective Workload Assessment  
28  
29 Technique;

30  
31  
32 EMRs= Electronic Medical Records

33  
34  
35 **Funding Statement:** This work was supported by the National Natural Science  
36  
37 Foundation of China (grant number 71774062). The funder had no role in study design,  
38  
39 data collection, and analysis, decision to publish, or preparation of the manuscript.  
40  
41

42  
43 **Acknowledgment** We would like to thank all the participants involved in this research  
44  
45 for their time and contributions.  
46  
47

48  
49 **Author Contributors:** Yinhuan Hu and Qiang Fu designed the study; Chuntao Lu and  
50  
51 Jinzhu Xie made formal analysis; Yinhuan Hu obtained funding; Jinzhu Xie and Lu Deng  
52  
53 took part in the investigation; Liuming Wang, Chuntao Lu and Lu Deng were involved  
54  
55 in data cleaning; Chuntao Lu wrote the original draft; Samuel Governor, Qiang Fu and  
56  
57 Chao Li contributed to the interpretation of the results; Chao Li and Chuntao Lu made  
58  
59  
60

1  
2  
3  
4 critical revision of the manuscript; All authors have read and approved the final  
5  
6 manuscript.  
7

8  
9 **Competing interests:** We have read and understood BMJ policy on declaration of  
10  
11 interests and declare that we have no competing interests.  
12

13  
14 **Patient consent:** Not required.  
15

16  
17 **Ethics approval:** The Ethics Committee of Tongji Medical College, Huazhong University  
18  
19 of Science and Technology (IORG No. IORG0003571) gave the final approval for the  
20  
21 study.  
22

23  
24 **Data sharing:** The datasets used and/or analyzed during the current study are  
25  
26 available from the corresponding author on reasonable request.  
27  
28  
29  
30  
31  
32

### 33 **Reference**

- 34  
35  
36  
37 1. Györfy Z, Dweik D, Girasek E. Workload, mental health and burnout indicators  
38 among female physicians[J]. *Hum resour health*, 2016, 14: 12.
- 39  
40  
41 2. Lu L, Gao M, Yang T, et al. The updated Physician's Pledge and Chinese junior  
42 physicians. *The Lancet*. 2018;391:305.
- 43  
44  
45 3. Karahan A, Kav S, Abbasoglu A, et al. Low back pain: prevalence and associated risk  
46 factors among hospital staff. *J Adv Nurs*. 2009;65: 516-524.
- 47  
48  
49 4. Smith-Miller CA, Shaw-Kokot J, Curro B, et al. An integrative review: fatigue among  
50 nurses in acute care settings. *J Nurs Adm*. 2014;44:487-494.
- 51  
52  
53 5. Arvidsson I, Simonsen JG, Balogh I. Discrepancies in pain presentation caused by  
54 adverse psychosocial conditions as compared to pain due to high physical  
55 workload? *Work*. 2012;41:2472-2475.
- 56  
57  
58 6. Manty M, Moller A, Nilsson C, et al. Association of physical workload and leisure  
59  
60

- 1  
2  
3  
4 time physical activity with incident mobility limitations: a follow-up study. *Occup*  
5 *Environ Med.* 2014; 71:543-548.  
6  
7  
8 7. Ridley C. Relating nursing workload to quality of care in child and adolescent mental  
9 health inpatient services. *Int J Health Care Qual Assur.*2007;20:429-440.  
10  
11 8. Michtalik HJ, Pronovost PJ, Marsteller JA, et al. Identifying potential predictors of a  
12 safe attending physician workload: a survey of hospitalists. *J Hosp Med.*2013;  
13 8:644-646.  
14  
15 9. Michtalik HJ, Yeh HC, Pronovost PJ, et al. Impact of attending physician workload  
16 on patient care a survey of hospitalists. *JAMA Intern Med.*2013; 173:375-377.  
17  
18 10. Garcia-Lacalle J. Balancing physician workload and patient satisfaction: a dilemma  
19 for hospital managers. *Public Money & Management.*2010;30:183-188.  
20  
21 11. Steyrer J, Schiffinger M, Huber C, et al. Attitude is everything? The impact of  
22 workload, safety climate, and safety tools on medical errors: a study of intensive  
23 care units. *Health Care Manage R.*2013;38:306-316.  
24  
25 12. Pedroja AT, Blegen MA, Abravanel R. The relationship between hospital systems  
26 load and patient harm. *J Patient Saf.* 2014;10:168-175.  
27  
28 13. Williams E S, Rondeau K V, Xiao Q, et al. Heavy physician workloads: impact on  
29 physician attitudes and outcomes. *Health Care Manage R*, 2007, 20: 261-269.  
30  
31 14. Hart SG. Theory and Measurement of Human Workload. *J Oper Res*  
32 *Soc.*1988;39:725-734.  
33  
34 15. Cain B. A review of the mental workload literature. Toronto: Defence Research And  
35 Development, 2007.  
36  
37 16. Lysaght RJ, Hill SG, Dick AO, et al. Operator workload: Comprehensive review and  
38 evaluation of operator workload methodologies. Analytics inc willow grove pa,  
39 1989.  
40  
41 17 Theorell T, Hammarström A, Aronsson G, et al. A systematic review including meta-  
42 analysis of work environment and depressive symptoms[J]. *BMC public health*,  
43 2015, 15(1): 738.  
44  
45 18 Noseworthy J, Madara J, Cosgrove D, et al. Physician burnout is a public health crisis:  
46 a message to our fellow health care CEOs[J]. *Health Affairs Blog*, 2017.  
47  
48  
49  
50  
51  
52  
53  
54  
55  
56  
57  
58  
59  
60

- 19 Olson K, Sinsky C, Rinne S T, et al. Cross - sectional survey of workplace stressors associated with physician burnout measured by the Mini - Z and the Maslach Burnout Inventory[J]. *Stress and Health*, 2019, 35(2): 157-175.
20. Weigl M, Müller A, Holland S, et al. Work conditions, mental workload and patient care quality: a multisource study in the emergency department. *BMJ Qual Saf.* 2016; 25: 499-508.
21. European Commission. European Pact for health and mental health. [http://ec.europa.eu/health/mental\\_health/policy\\_es](http://ec.europa.eu/health/mental_health/policy_es). (Accessed on 24th Sep 2018)
22. Bertram DA, Opila DA, Brown JL, et al. Measuring physician mental workload: reliability and validity assessment of a brief instrument. *Med Care.*1992;30: 95-104.
23. Hart SG, Staveland LE. Development of NASA-TLX (Task Load Index): Results of empirical and theoretical research. *Adv Psychol.* 1998;52:139-183.
24. Rubio S, Díaz E, Martín J, et al. Evaluation of subjective mental workload: A comparison of SWAT, NASA-TLX, and workload profile methods. *Appl Psychol.* 2004; 53: 61-86.
25. Hill SG, Iavecchia HP, Byers JC. Comparison of four subjective workload rating scales. *Hum Factors.*1992;34:429.
26. Rubio-Valdehita S, Lopez-Nunez MI, Lopez-Higes R, et al. Development of the CarMen-Q Questionnaire for mental workload assessment. *Psicothema.* 2017; 29:570-576.
27. Colligan L, Potts HW, Finn CT, et al. Cognitive workload changes for nurses transitioning from a legacy system with paper documentation to a commercial electronic health record. *Int J Med Inform.*2015; 84:469-476.
28. Hoonakker P, Carayon P, Gurses A, et al. Measuring Workload Of ICU Nurses with a Questionnaire Survey: The NASA Task Load Index (TLX). *IIE Trans Healthc Syst Eng.* 2011;1:131-143.
29. Malekpour F, Malekpour A R, Mohammadian Y, et al. Assessment of mental workload in nursing by using NASA-TLX. *The Journal of Urmia Nursing and*

- 1  
2  
3  
4 *Midwifery Faculty*.2014; 11: 892-899.
- 5  
6 30. Reid GB, Nygren TE. The Subjective Workload Assessment Technique: A Scaling  
7 Procedure for Measuring Mental Workload. *Adv Psychol*.1988; 52.
- 8  
9  
10 31. The COPSQ III questionnaire. <https://www.copsoq-network.org/assets/Uploads/annex1-Dimensions-and-items-in-the-COPSQ-III-questionnaire-060718.pdf>  
11  
12 f (Accessed on 14<sup>th</sup> June 2019)
- 13  
14  
15 32. Zhou H, Han X, Zhang J, et al. Job satisfaction and associated factors among medical  
16 staff in tertiary public hospitals: Results from a national cross-sectional survey in  
17 China. *Int J Occup Env Heal*. 2018; 15: 1528.
- 18  
19  
20 33. Sun J, Ma J, Hu G, et al. Welfare, wellness, and job satisfaction of Chinese  
21 physicians: A national survey of public tertiary hospitals in China. *Int J Health Plan*  
22  
23 *M*. 2017; 32: 270-284.
- 24  
25  
26 34. The Lancet, Ending violence against doctors in China. *The Lancet*. 2012; 379:1764.
- 27  
28  
29 35. Chinese Hospital Association. Chinese patient safety goal 2014-2015.  
30 <http://www.cha.org.cn/plus/view.php?aid=14626> (Accessed on 24<sup>th</sup> Sep 2018)
- 31  
32  
33 36. Power M, Quinn K, Schmidt S, et al. Development of the WHOQOL-old module.  
34  
35 *Qual Life Res*. 2005; 14 (10):2197-2214.
- 36  
37  
38 37. Kline RB. Principles and practice of structural equation modeling. 3rd ed. New York:  
39 Guilford publications, 2015:69-70.
- 40  
41  
42 38. Ford JK, MacCullum RC, Tait M. The application of exploratory factor analysis in  
43 applied psychology: A critical review and analysis. *Pers Psychol*. 1986; 39:291-314.
- 44  
45  
46 39. Lynn MR. Determination and quantification of content validity. *Nursing Res*. 1986;  
47 35:382-385.
- 48  
49  
50 40. Dilorio C K. Measurement in health behavior: methods for research and evaluation.  
51 John Wiley & Sons, 2006.
- 52  
53  
54 41. Tabachnick B, Fidell LS. Using Multivariate Statistics. 6<sup>th</sup> ed., Pearson, Boston, 2013:  
55 720-726.
- 56  
57  
58 42. DiDomenico A, Nussbaum MA. Effects of different physical workload parameters  
59 on mental workload and performance. *Int J Ind Ergonom* 2011. 41;255-260.
- 60  
61 43. Tang L, Guan M. Rise of Health Consumerism in China and Its Effects on Physicians'

- 1  
2  
3 Professional Identity and the Physician-Patient Relationship and Communication.  
4  
5 *Health commun.*2018; 33:636-642.  
6  
7  
8 44. Yueju L. Violence against doctors in China. *The Lancet.* 2014; 384:745.  
9  
10 45. Sun T, Gao L, Shi Y. Workplace violence, psychological stress, sleep quality and  
11 subjective health in Chinese doctors: a large cross-sectional study. *BMJ OPEN.*  
12 2017;1-8.  
13  
14  
15 46. Wen J, Cheng Y, Hu X. Workload, burnout, and medical mistakes among physicians  
16 in China: A cross-sectional study. *Biosci trends.* 2016; 10:27-33.  
17  
18  
19 47. Chinese Medical Doctor Association. White Paper on the Practice of Medi  
20 cine by Chinese Physicians. [http://www.cmda.net/u/cms/www/201807/0618](http://www.cmda.net/u/cms/www/201807/06181247ffex.pdf)  
21 1247ffex.pdf. (Accessed on 14<sup>th</sup> June 2019)  
22  
23  
24  
25 48. Horner RD, Szaflarsk JP, Ying J. Physician Work Intensity Among Medical Specialties:  
26 Emerging Evidence on its Magnitude and Composition. *Med Care.* 2011; 49:1007-  
27 1011.  
28  
29  
30  
31 49. Charles RL, Nixon J. Measuring mental workload using physiological measures: A  
32 systematic review[J]. *Appl ergon.* 2019; 74: 221-232.  
33  
34  
35 50. Mosaly PR, Mazur LM, Yu F. Relating Task Demand, Mental Effort and Task  
36 Difficulty with Physicians' Performance during Interactions with Electronic Health  
37 Records (EHRs). *Int J Hum-Comput Int.* 2017; 34:467-475.  
38  
39  
40  
41 51. Colle HA, Reid GB. Context effects in subjective mental workload ratings. *Hum*  
42 *factors.* 1998; 40: 591-600.  
43  
44  
45  
46  
47  
48  
49  
50  
51  
52  
53  
54  
55  
56  
57  
58  
59  
60

# Reporting checklist for cross sectional study.

Based on the STROBE cross sectional guidelines.

## Instructions to authors

Complete this checklist by entering the page numbers from your manuscript where readers will find each of the items listed below.

Your article may not currently address all the items on the checklist. Please modify your text to include the missing information. If you are certain that an item does not apply, please write "n/a" and provide a short explanation.

Upload your completed checklist as an extra file when you submit to a journal.

In your methods section, say that you used the STROBE cross sectional reporting guidelines, and cite them as:

von Elm E, Altman DG, Egger M, Pocock SJ, Gotsche PC, Vandembroucke JP. The Strengthening the Reporting of Observational Studies in Epidemiology (STROBE) Statement: guidelines for reporting observational studies.

|                           |                     | Reporting Item                                                                                  | Page Number |
|---------------------------|---------------------|-------------------------------------------------------------------------------------------------|-------------|
| <b>Title and abstract</b> |                     |                                                                                                 |             |
| Title                     | <a href="#">#1a</a> | Indicate the study's design with a commonly used term in the title or the abstract              | 1           |
| Abstract                  | <a href="#">#1b</a> | Provide in the abstract an informative and balanced summary of what was done and what was found | 2           |
| <b>Introduction</b>       |                     |                                                                                                 |             |
| Background / rationale    | <a href="#">#2</a>  | Explain the scientific background and rationale for the investigation being reported            | 3-4         |
| Objectives                | <a href="#">#3</a>  | State specific objectives, including any prespecified hypotheses                                | 5           |
| <b>Methods</b>            |                     |                                                                                                 |             |



|    |                      |                      |                                                                   |      |
|----|----------------------|----------------------|-------------------------------------------------------------------|------|
| 1  | Study design         | <a href="#">#4</a>   | Present key elements of study design early in the paper           | 5    |
| 2  |                      |                      |                                                                   |      |
| 3  | Setting              | <a href="#">#5</a>   | Describe the setting, locations, and relevant dates, including    | 6-7  |
| 4  |                      |                      | periods of recruitment, exposure, follow-up, and data collection  |      |
| 5  |                      |                      |                                                                   |      |
| 6  |                      |                      |                                                                   |      |
| 7  | Eligibility criteria | <a href="#">#6a</a>  | Give the eligibility criteria, and the sources and methods of     | 7    |
| 8  |                      |                      | selection of participants.                                        |      |
| 9  |                      |                      |                                                                   |      |
| 10 |                      |                      |                                                                   |      |
| 11 |                      | <a href="#">#7</a>   | Clearly define all outcomes, exposures, predictors, potential     | 9-10 |
| 12 |                      |                      | confounders, and effect modifiers. Give diagnostic criteria, if   |      |
| 13 |                      |                      | applicable                                                        |      |
| 14 |                      |                      |                                                                   |      |
| 15 |                      |                      |                                                                   |      |
| 16 | Data sources /       | <a href="#">#8</a>   | For each variable of interest give sources of data and details of | n/a  |
| 17 | measurement          |                      | methods of assessment (measurement). Describe                     |      |
| 18 |                      |                      | comparability of assessment methods if there is more than one     |      |
| 19 |                      |                      | group. Give information separately for for exposed and            |      |
| 20 |                      |                      | unexposed groups if applicable.                                   |      |
| 21 |                      |                      |                                                                   |      |
| 22 |                      |                      |                                                                   |      |
| 23 |                      |                      |                                                                   |      |
| 24 | Bias                 | <a href="#">#9</a>   | Describe any efforts to address potential sources of bias         | 17   |
| 25 |                      |                      |                                                                   |      |
| 26 |                      |                      |                                                                   |      |
| 27 | Study size           | <a href="#">#10</a>  | Explain how the study size was arrived at                         | 7    |
| 28 |                      |                      |                                                                   |      |
| 29 | Quantitative         | <a href="#">#11</a>  | Explain how quantitative variables were handled in the            | n/a  |
| 30 | variables            |                      | analyses. If applicable, describe which groupings were chosen,    |      |
| 31 |                      |                      | and why                                                           |      |
| 32 |                      |                      |                                                                   |      |
| 33 |                      |                      |                                                                   |      |
| 34 | Statistical          | <a href="#">#12a</a> | Describe all statistical methods, including those used to control | 9-10 |
| 35 | methods              |                      | for confounding                                                   |      |
| 36 |                      |                      |                                                                   |      |
| 37 |                      |                      |                                                                   |      |
| 38 | Statistical          | <a href="#">#12b</a> | Describe any methods used to examine subgroups and                | n/a  |
| 39 | methods              |                      | interactions                                                      |      |
| 40 |                      |                      |                                                                   |      |
| 41 |                      |                      |                                                                   |      |
| 42 | Statistical          | <a href="#">#12c</a> | Explain how missing data were addressed                           | 7    |
| 43 | methods              |                      |                                                                   |      |
| 44 |                      |                      |                                                                   |      |
| 45 |                      |                      |                                                                   |      |
| 46 | Statistical          | <a href="#">#12d</a> | If applicable, describe analytical methods taking account of      | 9-10 |
| 47 | methods              |                      | sampling strategy                                                 |      |
| 48 |                      |                      |                                                                   |      |
| 49 |                      |                      |                                                                   |      |
| 50 | Statistical          | <a href="#">#12e</a> | Describe any sensitivity analyses                                 | n/a  |
| 51 | methods              |                      |                                                                   |      |
| 52 |                      |                      |                                                                   |      |
| 53 |                      |                      |                                                                   |      |
| 54 | <b>Results</b>       |                      |                                                                   |      |
| 55 |                      |                      |                                                                   |      |
| 56 | Participants         | <a href="#">#13a</a> | Report numbers of individuals at each stage of study—eg           | 6-7  |
| 57 |                      |                      | numbers potentially eligible, examined for eligibility, confirmed |      |
| 58 |                      |                      |                                                                   |      |
| 59 |                      |                      |                                                                   |      |
| 60 |                      |                      |                                                                   |      |

eligible, included in the study, completing follow-up, and analysed. Give information separately for for exposed and unexposed groups if applicable.

|    |                   |                      |                                                                        |
|----|-------------------|----------------------|------------------------------------------------------------------------|
| 1  |                   |                      |                                                                        |
| 2  |                   |                      |                                                                        |
| 3  |                   |                      |                                                                        |
| 4  |                   |                      |                                                                        |
| 5  | Participants      | <a href="#">#13b</a> | Give reasons for non-participation at each stage n/a                   |
| 6  |                   |                      |                                                                        |
| 7  | Participants      | <a href="#">#13c</a> | Consider use of a flow diagram n/a                                     |
| 8  |                   |                      |                                                                        |
| 9  |                   |                      |                                                                        |
| 10 | Descriptive data  | <a href="#">#14a</a> | Give characteristics of study participants (eg demographic, 11         |
| 11 |                   |                      | clinical, social) and information on exposures and potential           |
| 12 |                   |                      | confounders. Give information separately for exposed and               |
| 13 |                   |                      | unexposed groups if applicable.                                        |
| 14 |                   |                      |                                                                        |
| 15 |                   |                      |                                                                        |
| 16 |                   |                      |                                                                        |
| 17 | Descriptive data  | <a href="#">#14b</a> | Indicate number of participants with missing data for each 7           |
| 18 |                   |                      | variable of interest                                                   |
| 19 |                   |                      |                                                                        |
| 20 |                   |                      |                                                                        |
| 21 | Outcome data      | <a href="#">#15</a>  | Report numbers of outcome events or summary measures. 12-15            |
| 22 |                   |                      | Give information separately for exposed and unexposed                  |
| 23 |                   |                      | groups if applicable.                                                  |
| 24 |                   |                      |                                                                        |
| 25 |                   |                      |                                                                        |
| 26 | Main results      | <a href="#">#16a</a> | Give unadjusted estimates and, if applicable, confounder- n/a          |
| 27 |                   |                      | adjusted estimates and their precision (eg, 95% confidence             |
| 28 |                   |                      | interval). Make clear which confounders were adjusted for and          |
| 29 |                   |                      | why they were included                                                 |
| 30 |                   |                      |                                                                        |
| 31 |                   |                      |                                                                        |
| 32 |                   |                      |                                                                        |
| 33 | Main results      | <a href="#">#16b</a> | Report category boundaries when continuous variables were n/a          |
| 34 |                   |                      | categorized                                                            |
| 35 |                   |                      |                                                                        |
| 36 |                   |                      |                                                                        |
| 37 | Main results      | <a href="#">#16c</a> | If relevant, consider translating estimates of relative risk into n/a  |
| 38 |                   |                      | absolute risk for a meaningful time period                             |
| 39 |                   |                      |                                                                        |
| 40 |                   |                      |                                                                        |
| 41 | Other analyses    | <a href="#">#17</a>  | Report other analyses done—e.g., analyses of subgroups and n/a         |
| 42 |                   |                      | interactions, and sensitivity analyses                                 |
| 43 |                   |                      |                                                                        |
| 44 | <b>Discussion</b> |                      |                                                                        |
| 45 |                   |                      |                                                                        |
| 46 | Key results       | <a href="#">#18</a>  | Summarise key results with reference to study objectives 15-16         |
| 47 |                   |                      |                                                                        |
| 48 |                   |                      |                                                                        |
| 49 | Limitations       | <a href="#">#19</a>  | Discuss limitations of the study, taking into account sources of 17-18 |
| 50 |                   |                      | potential bias or imprecision. Discuss both direction and              |
| 51 |                   |                      | magnitude of any potential bias.                                       |
| 52 |                   |                      |                                                                        |
| 53 |                   |                      |                                                                        |
| 54 | Interpretation    | <a href="#">#20</a>  | Give a cautious overall interpretation considering objectives, 17      |
| 55 |                   |                      | limitations, multiplicity of analyses, results from similar studies,   |
| 56 |                   |                      | and other relevant evidence.                                           |
| 57 |                   |                      |                                                                        |
| 58 |                   |                      |                                                                        |
| 59 |                   |                      |                                                                        |
| 60 |                   |                      |                                                                        |

1 Generalisability [#21](#) Discuss the generalisability (external validity) of the study 18  
2 results  
3

4  
5 **Other**  
6 **Information**  
7

8  
9 Funding [#22](#) Give the source of funding and the role of the funders for the 19  
10 present study and, if applicable, for the original study on which  
11 the present article is based  
12

13  
14 None The STROBE checklist is distributed under the terms of the Creative Commons Attribution  
15 License CC-BY. This checklist can be completed online using <https://www.goodreports.org/>, a tool  
16 made by the [EQUATOR Network](#) in collaboration with [Penelope.ai](#)  
17  
18  
19  
20  
21  
22  
23  
24  
25  
26  
27  
28  
29  
30  
31  
32  
33  
34  
35  
36  
37  
38  
39  
40  
41  
42  
43  
44  
45  
46  
47  
48  
49  
50  
51  
52  
53  
54  
55  
56  
57  
58  
59  
60

# BMJ Open

## Physician Mental Workload Scale in China: Development and Psychometric Evaluation

|                                 |                                                                                                                                                                                                                                                                                                                                                                                                                                                                                                                                                                                                                                                                                                                                                                                                                                                                                                                                                                               |
|---------------------------------|-------------------------------------------------------------------------------------------------------------------------------------------------------------------------------------------------------------------------------------------------------------------------------------------------------------------------------------------------------------------------------------------------------------------------------------------------------------------------------------------------------------------------------------------------------------------------------------------------------------------------------------------------------------------------------------------------------------------------------------------------------------------------------------------------------------------------------------------------------------------------------------------------------------------------------------------------------------------------------|
| Journal:                        | <i>BMJ Open</i>                                                                                                                                                                                                                                                                                                                                                                                                                                                                                                                                                                                                                                                                                                                                                                                                                                                                                                                                                               |
| Manuscript ID                   | bmjopen-2019-030137.R3                                                                                                                                                                                                                                                                                                                                                                                                                                                                                                                                                                                                                                                                                                                                                                                                                                                                                                                                                        |
| Article Type:                   | Original research                                                                                                                                                                                                                                                                                                                                                                                                                                                                                                                                                                                                                                                                                                                                                                                                                                                                                                                                                             |
| Date Submitted by the Author:   | 06-Sep-2019                                                                                                                                                                                                                                                                                                                                                                                                                                                                                                                                                                                                                                                                                                                                                                                                                                                                                                                                                                   |
| Complete List of Authors:       | Lu, Chuntao; Huazhong University of Science and Technology Tongji Medical College, School of Medicine and Health Management; Jingchu University of Technology Affiliated Central Hospital<br>Hu, Yinhan; Huazhong University of Science and Technology Tongji Medical College, School of Medicine and Health Management<br>Fu, Qiang; Saint Louis University, College for Public Health and Social Justice, Department of Epidemiology and Biostatistics<br>Governor, Samuel ; Saint Louis University, College for Public Health and Social Justice, Department of Epidemiology and Biostatistics<br>Wang, Liuming; Huazhong University of Science and Technology Tongji Medical College, Tongji Hospital<br>Li, Chao; Jingchu University of Technology Affiliated Central Hospital<br>Deng, Lu; Huazhong University of Science and Technology Tongji Medical College, School of Medicine and Health Management<br>Xie, Jinzhu; The Third People's Hospital of Hubei Province |
| <b>Primary Subject Heading</b>: | Mental health                                                                                                                                                                                                                                                                                                                                                                                                                                                                                                                                                                                                                                                                                                                                                                                                                                                                                                                                                                 |
| Secondary Subject Heading:      | Mental health                                                                                                                                                                                                                                                                                                                                                                                                                                                                                                                                                                                                                                                                                                                                                                                                                                                                                                                                                                 |
| Keywords:                       | Physician, MENTAL HEALTH, Workload, Survey and Questionnaires, Hospitals, Public                                                                                                                                                                                                                                                                                                                                                                                                                                                                                                                                                                                                                                                                                                                                                                                                                                                                                              |
|                                 |                                                                                                                                                                                                                                                                                                                                                                                                                                                                                                                                                                                                                                                                                                                                                                                                                                                                                                                                                                               |

SCHOLARONE™  
Manuscripts

**Title page**

Physician Mental Workload Scale in China: Development and Psychometric  
Evaluation

Chuntao Lu Yinhan Hu\* Qiang Fu Samuel Governor Liuming Wang Chao Li Lu Deng  
Jinzhu Xie

Corresponding author:

\*Yinhan Hu

Address: No.13 Hangkong Rd., Wuhan, Hubei 430030, P.R. China

Email: [hyh288@hotmail.com](mailto:hyh288@hotmail.com)

Telephone number: 13554285879

Co-author:

Chuntao Lu: 1.School of Medicine and Health Management, Tongji Medical College,  
Huazhong University of Science and Technology, No.13 Hangkong Rd., Wuhan, Hubei  
430030, P.R. China.

2. Jingchu University of Technology Affiliated Central Hospital, No.39 Xiangshan Rd.,  
Jingmen, Hubei 448126, P.R. China

Yinhan Hu: School of Medicine and Health Management, Tongji Medical College,  
Huazhong University of Science and Technology, No.13 Hangkong Rd., Wuhan, Hubei  
430030, P.R. China

Qiang Fu: Department of Epidemiology and Biostatistics, College for Public Health

1  
2  
3  
4 and Social Justice, Saint Louis University, Missouri, MO, United States  
5

6 Samuel Governor: Department of Epidemiology and Biostatistics, College for Public  
7  
8 Health and Social Justice, Saint Louis University, Missouri, MO, United States  
9

10  
11 Liuming Wang: Tongji Hospital, Tongji Medical College of Huazhong University of  
12  
13 Science and Technology, No.1095 Jiefang Rd., Wuhan, Hubei 430030, P.R. China  
14  
15

16  
17 Chao Li: Jingchu University of Technology Affiliated Central Hospital. No.39  
18  
19 Xiangshan Rd., Jingmen, Hubei 448126, P.R. China  
20  
21

22  
23 Lu Deng : School of Medicine and Health Management, Tongji Medical College,  
24  
25 Huazhong University of Science and Technology, No.13 Hangkong Rd., Wuhan, Hubei  
26  
27 430030, P.R. China  
28

29  
30 Jinzhu Xie: The Third People's Hospital of Hubei Province, No.26 Zhongshan Rd.,  
31  
32 Wuhan, Hubei 430030, P.R. China.  
33  
34  
35  
36  
37  
38  
39  
40  
41  
42  
43  
44  
45  
46  
47  
48  
49  
50  
51  
52  
53  
54  
55  
56  
57  
58  
59  
60

## Abstract

**Objective:** The purpose of our study is to develop a mental workload scale for physicians in China and assess the scale's reliability and validity.

**Design:** The instrument was developed over three phases involving 396 physicians from different tiers of comprehensive public hospitals in China. In the first phase, an initial item pool was developed through a systematic literature review. The second phase consisted of two rounds of Delphi expert consultations and a pilot survey. The third phase tested the reliability and validity of the instrument.

**Setting:** Public hospitals in China.

**Participants:** A total of 396 physicians from different tiers of comprehensive public hospitals in China participated in this study in 2018.

**Primary and secondary outcome measures:** Cronbach's alpha, content validity index, the correlation coefficient between the items and dimensions, and indices of confirmatory factor analysis.

**Results:** Six dimensions (mental demands, physical demands, temporal demands, perceived risk, frustration level, and performance) and twelve items were identified in the instrument. For reliability, Cronbach's  $\alpha$  for the whole scale was 0.81. For validity, the corrected item-content validity index of each item ranged from 0.85 to 1, and the correlation coefficients between the dimensions and total scores ranged from 0.37-0.72. The results of the confirmatory factor analysis showed that the goodness-of-fit indices of the scale were satisfactory.

**Conclusion:** The instrument showed good reliability and validity, and it is useful for

1  
2  
3  
4 diagnosing the mental workload of physicians.  
5

6 **Keywords:** Physician; Mental Health; Workload; Survey and Questionnaires;  
7  
8  
9 Hospitals, Public  
10

## 11 12 13 14 **Article summary**

### 15 16 17 **Strengths and limitations of this study**

18  
19 This is the first study to develop a measurement of physician mental workload from  
20  
21 a subjective perspective in China.  
22

23  
24 Qualitative and quantitative methods were involved in item selection.  
25

26  
27 There was a potential reporting bias in the self-reported measurements of physician  
28  
29 workload.  
30

31  
32 There was a selection bias due to all respondents voluntarily rather than randomly  
33  
34 participating in the survey.  
35

36  
37 Among the six dimensions, perceived risk included only one item, which may have  
38  
39 resulted in measurement error.  
40  
41  
42  
43  
44  
45  
46  
47  
48  
49  
50  
51  
52  
53  
54  
55  
56  
57  
58  
59  
60



## Introduction

Internationally, there has been a focus on the relationship between physicians' workload and their health. <sup>1</sup> Physicians' health is highly associated with their workload. <sup>2</sup> Excessive workload impacts physicians' health <sup>3-4</sup> and increases the risk of work-related musculoskeletal disorders (MSDs). <sup>5-6</sup> High workload is related to adverse effects in the form of medical errors <sup>7</sup> and adverse incidents. <sup>8</sup> Physician workload can negatively contribute to patients' perceived quality of care <sup>9</sup> and affect patient satisfaction <sup>10</sup> and safety. <sup>11-12</sup> It is possible that these stressors have reached a point where they pose a severe problem for the entire healthcare system, <sup>13</sup> as physicians' unreasonable and overwhelming workload has adverse effects on physicians, patients, and healthcare organizations. <sup>14</sup>

Workload is thought to be multidimensional and multifaceted. <sup>15</sup> One aspect of workload includes the subjective psychological experiences of the human operator. <sup>16</sup> Mental workload has emerged as one of the most critical occupational risk factors that results in burnout or anxiety. <sup>17</sup> A lack of control over workload is expected to correlate closely with burnout. <sup>18,19</sup> Heavy mental workload can lead to serious health problems (cardiovascular diseases, digestive problems, etc.) for physicians<sup>17</sup> and an inferior quality of care service. <sup>20</sup> Currently, The European Pact for Mental Health and Welfare is conducting mental workload assessments to promote physical and mental wellbeing. <sup>21</sup>

Different tools have been proposed to assess mental workload. Previous research established a brief instrument with six items to measure physician mental

1  
2  
3  
4 workload. <sup>22</sup> The NASA-Task Load Index (NASA-TLX) scale, which is widely used in  
5  
6 measuring mental workload <sup>23</sup>, has proven to be a sensitive, valid, and reliable  
7  
8 instrument <sup>24</sup> and can be used in human factor research. <sup>25</sup> Researcher has localized  
9  
10 it as a 29-item questionnaire in Spain to measure workers' mental workload. <sup>26</sup> The  
11  
12 existing body of research on NASA-TLX suggests that it can be used to measure nurse  
13  
14 workload in health care settings. <sup>27-29</sup> In the same vein, the Subjective Workload  
15  
16 Assessment Technique (SWAT) is a subjective rating technique with three  
17  
18 dimensions—time load, mental effort load, and psychological stress load—and is  
19  
20 used to assess mental workload. <sup>30</sup> It has been successfully applied in assessing the  
21  
22 mental workload of several aircraft multitasking conditions, such as in assessing the  
23  
24 mental workload required by different systems of air defence. <sup>24</sup> The Copenhagen  
25  
26 Psychosocial Questionnaire is a widespread tool used in the industrial and service  
27  
28 branches in Europe, and its main dimensions include the most influential  
29  
30 psychosocial theories at work. <sup>31</sup> Together, these tools provide essential insights into  
31  
32 workload measurement in health care management, especially in nurse workload  
33  
34 measurement. However, the workload of physicians and nurses is essentially  
35  
36 different from the workload of the workers that previous measurements were  
37  
38 designed to assess. Thus, it remains unclear whether these tools can be directly used  
39  
40 in measuring physician mental workload, and a mental workload measurement must  
41  
42 be developed for physicians.  
43  
44  
45  
46  
47  
48  
49  
50  
51  
52  
53

54  
55  
56 With increasing patient health demands, physicians tend to have a heavier  
57  
58 workload, worse physical health, more mental strain, and more intense relationships  
59  
60

1  
2  
3  
4 with patients in China. <sup>32</sup> Data from several studies suggest that most physicians  
5  
6 work more than 10 hours a day <sup>33</sup> to manage outpatients and inpatients. On average,  
7  
8 a physician in a tertiary hospital is responsible for 8.10 outpatients and 2.70 beds per  
9  
10 day. <sup>32</sup> Physicians have been abused, injured, and, in extreme cases, murdered by  
11  
12 patients or their relatives in hospitals across China, <sup>34</sup> which results in psychological  
13  
14 stress. Establishing a workload measurement system for medical personnel has been  
15  
16 incorporated into the Chinese Patient Safety Goals by the Chinese Hospital  
17  
18 Association. <sup>35</sup>

19  
20  
21  
22  
23  
24  
25 Existing studies on workload measurement instruments are concentrated on  
26  
27 assessing objective workload in China, for example, measuring work time. While  
28  
29 physicians' mental workload is a critical problem, there are few instruments  
30  
31 exploring this problem in China. The purpose of this paper is to develop a scientific  
32  
33 mental workload instrument that can be used to assess the mental workload of  
34  
35 physicians.  
36  
37  
38  
39  
40  
41  
42  
43

## 44 **Methods**

### 45 46 47 **Study design**

48  
49  
50  
51 The instrument was developed in three phases. In the first phase, an initial item  
52  
53 pool was developed by integrating previous studies through a systematic literature  
54  
55 review. The second phase consisted of two rounds of Delphi expert consultations  
56  
57 and a pilot survey in 2017. The third phase involved testing the psychometric  
58  
59  
60

1  
2  
3  
4 properties of the instrument, including its reliability and validity, through a study  
5  
6 conducted in 2018 in comprehensive public hospitals in China.  
7  
8  
9

### 10 **Framework and item generation and selection**

11  
12  
13

14 We combined the dimensions of the NASA-TLX and SWAT frameworks to  
15  
16 determine the item pool so that it would measure the current situation of Chinese  
17  
18 physicians' workload. Six dimensions and fifteen items were sent to 20 experts  
19  
20 (including physicians, hospital managers, researchers, and human resource  
21  
22 managers) for consultation. In accordance with the findings from two rounds of  
23  
24 expert consultation, we deleted four items, added a new item (the intensity of  
25  
26 physical activities), and revised the descriptions of all items. Then, there were six  
27  
28 dimensions (physical demands, mental demands, temporal demands, effort,  
29  
30 frustration level, and performance) and twelve items, which consisted of a pre-scale  
31  
32 ranging from 0 to 100.  
33  
34  
35  
36  
37  
38  
39

40 In the pre-survey analysis, we selected three hospitals (one tertiary hospital,  
41  
42 one secondary hospital, and one first-tier hospital) through convenience sampling. A  
43  
44 sample of 80 physicians was surveyed with a web-based scale during November and  
45  
46 December 2017. Finally, a valid sample of 74 physicians was used for item selection.  
47  
48 Items were refined based on the following indexes or methods: critical ratio (CR),  
49  
50 coefficient of variation (CV), correlation analysis,<sup>36</sup> Cronbach's  $\alpha$ ,<sup>37</sup> and exploratory  
51  
52 factor analysis (EFA).<sup>38</sup>  
53  
54  
55  
56  
57

58 If an item was eliminated by any of the above methods, then the item was  
59  
60

1  
2  
3  
4 deleted or revised. The final scale consisted of six dimensions (mental demands,  
5  
6 physical demands, temporal demands, perceived risk, frustration level, and  
7  
8 performance) and twelve items (Table 1).  
9  
10

### 11 12 **Data collection for testing the validity and reliability of the scale**

13  
14  
15  
16 To check the validity and reliability of the developed scale, we planned to  
17  
18 survey 400 respondents (physicians working in hospitals) from different tiers of  
19  
20 hospitals (two tertiary hospitals, two secondary hospitals, and two first-tier  
21  
22 hospitals). These hospitals were randomly selected from Hubei province, China. We  
23  
24 used wenjuanxing (www.wjx.cn), a widely used website for conducting surveys in  
25  
26 China, to develop an electronic questionnaire with which to survey physicians.  
27  
28 Respondents could scan the access code or click on the website using their phones to  
29  
30 access and complete the electronic questionnaire. We sent the access code and  
31  
32 website to the human resource managers at each participating hospital, who then  
33  
34 sent the access code to the physicians' online communication group at each hospital.  
35  
36 Three hundred ninety-six physicians voluntarily participated in the survey before  
37  
38 March 2018; eleven invalid samples were deleted.  
39  
40  
41  
42  
43  
44  
45  
46

47  
48 The detailed scale instructions indicated that our scale was anonymous, that  
49  
50 participation was voluntary, and that our survey aimed to develop a physician  
51  
52 mental workload scale, so the results would not be used for other purposes. The  
53  
54 physician mental workload scale included three parts. The first part of the scale  
55  
56 included twelve items that respondents scored one by one. The second part was a  
57  
58  
59  
60

table that included 15 pairs of dimensions and was used to collect the weights of each dimension. Every two dimensions formed a pair (e.g., Mental demands vs. Physical demands, Mental demands vs. Temporal demands, etc.). Respondents chose which of the two dimensions in each of the fifteen pairs contributed more to their workload. Then, the weight of each dimension was equal to the number of times that dimension was selected divided by 15. The third part of the scale was designed to collect physicians' individual characteristics.

The response endpoints of the items are displayed in Table 1. Items were scored as follows: 0, 10, 20, 30, 40, 50, 60, 70, 80, 90, and 100. The average scores of all items for a corresponding dimension were multiplied by the dimension weight to produce the dimension scores, and then, the total scores were calculated as the sum of all dimension scores.

Table 1 Dimensions and items of physician mental workload scale

| Dimensions and item                                                                                                                                           | Endpoints (0-100)                                                                                                                                        |
|---------------------------------------------------------------------------------------------------------------------------------------------------------------|----------------------------------------------------------------------------------------------------------------------------------------------------------|
| <b>A Mental demands</b>                                                                                                                                       |                                                                                                                                                          |
| A1 How demanding are the cognitive activities (e.g., sensation, perception, remembering, thinking, calculating, attention) required during your medical work? | no workload <span style="float: right;">heaviest workload</span><br>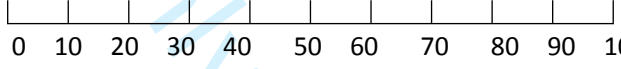 |
| A2 How demanding are emotion and feeling (e.g., empathy, sympathy, enthusiasm, negative emotion restraining) during your medical work?                        | no workload <span style="float: right;">heaviest workload</span><br> |
| A3 How hard do you have to work to overcome difficulties in accomplishing your medical work?                                                                  | no workload <span style="float: right;">heaviest workload</span><br> |
| <b>B Physical demands</b>                                                                                                                                     |                                                                                                                                                          |
| B1 How demanding are the physical activities required (e.g., standing, stationary, controlling, repetitive action) in your medical work?                      | no workload <span style="float: right;">heaviest workload</span><br> |
| B2 How intensive is the physical activity during                                                                                                              | no workload <span style="float: right;">heaviest workload</span><br> |

your medical work? (Is the work restful or laborious?)

0 10 20 30 40 50 60 70 80 90 100

### C Temporal demands

C1 How much pressure do you feel related to work time in your medical work? (Daily medical work required time is more/less than available time.)

no workload heaviest workload  
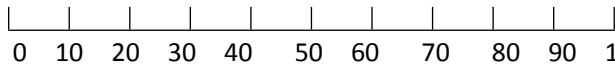

C2 How frequently do you have to complete multiple tasks at the same time (work overlap) in your medical work?

no workload heaviest workload  
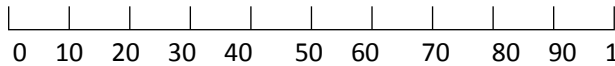

### D Perceived risk

D1 How risky do you perceive (e.g., medical disputes) your medical work to be?

no workload heaviest workload  
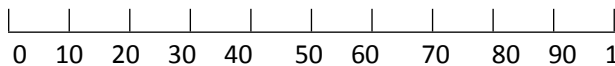

### E Frustration level

E1 How depressed or frustrated do you feel in your medical work?

no workload heaviest workload  
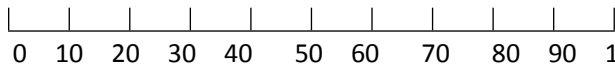

E2 How anxious or irritated do you feel in your medical work?

no workload heaviest workload  
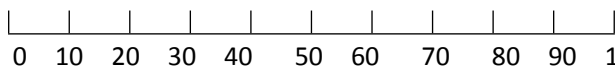

### F Performance

F1 How successful do you think you are in accomplishing the goals in your medical work?

heaviest workload no workload  
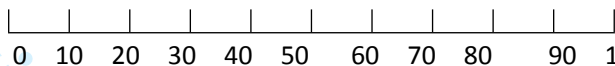

F2 How satisfied are you with the outcomes of your medical work?

heaviest workload no workload  
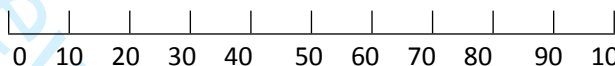

## Statistical analysis

Descriptive statistics are used to show the characteristics of the respondents, including gender, age, and educational level (i.e., Ph.D. degree, master's degree, undergraduate), job title (i.e., senior, middle, junior), work years, hospital level (i.e., tertiary hospitals, secondary hospitals, first-tier hospital), work hours per week, number of outpatients serviced per day, and self-perceived health status.

For the reliability of the scale, Cronbach's alpha was used to assess the internal

1  
2  
3  
4 consistency of each instrument component. Values of 0.70 or higher for Cronbach's  
5  
6 alpha were considered acceptable.<sup>37</sup>  
7

8  
9 The content validity index (CVI) of each item was calculated to assess the  
10 accuracy of the scale using scores of 1-4. Experts were invited to evaluate the items,  
11 with a score of 1 representing an item not relevant to the corresponding dimension  
12 and a score of 4 representing an item closely related to the corresponding  
13 dimension. The corrected item-content validity index (I-CVI) and average  
14 scale-content validity index (S-CVI/Ave) were calculated. A corrected I-CVI of 0.78 or  
15 higher and an S-CVI/Ave of 0.90 or greater were considered acceptable.<sup>39</sup>  
16  
17  
18  
19  
20  
21  
22  
23  
24  
25  
26

27 The test of construct validity was performed using the correlation coefficient  
28 method, EFA, and confirmatory factor analysis (CFA). Items with item-total  
29 correlation and dimension-total correlation values below 0.40 were revised or  
30 removed from the scale. Bartlett's test of sphericity scores lower than 0.05 and a  
31 Kaiser-Meyer-Olkin (KMO) score of sampling adequacy higher than 0.70 and close to  
32 1 were considered appropriate for factor analysis.<sup>40</sup> EFA and CFA were used to  
33 explore and confirm the structure of the scale. For the EFA, we used the varimax  
34 rotation method to examine whether the structure matched the framework. For the  
35 CFA, the criteria for the model fit indices were as follows:  $\chi^2/df < 3$ ; root mean square  
36 error of approximation (RMSEA)  $< 0.05$ ; root mean square residual (RMR)  $< 0.05$ ;  
37 goodness-of-fit index (GFI)  $> 0.90$ , comparative fit index (CFI)  $> 0.90$ , and Tucker-Lewis  
38 index (TLI)  $> 0.90$ .<sup>41</sup> Statistical analyses were performed with SPSS V. 21 (IBM Corp.,  
39 Armonk, NY, USA) and AMOS V.17 (IBM Corp., Armonk, NY, USA).  
40  
41  
42  
43  
44  
45  
46  
47  
48  
49  
50  
51  
52  
53  
54  
55  
56  
57  
58  
59  
60



## Patient and public involvement

Our participants were physicians working in hospitals. They took part in the pre-survey and formal survey to complete our scale. Participation was voluntary, and no incentives were provided for participation. Participants were not directly involved in the design or recruitment of this study. The results were not provided to participants.

## Results

### Sample characteristics

Three hundred ninety-six responses (online survey) were received, and 11 were excluded due to incomplete demographic information. There were no issues related to floor or ceiling effects as the questions for every item were responded to in the form of a web-based survey. The characteristics of the participants are presented in Table 2.

Table 2 Respondents' characteristics

| Variable                 | Valid sample | Percentage (%) |
|--------------------------|--------------|----------------|
| <b>Gender</b>            |              |                |
| Male                     | 200          | 51.9           |
| Female                   | 185          | 48.1           |
| <b>Age</b>               |              |                |
| <45                      | 258          | 67.0           |
| 45-55                    | 121          | 31.4           |
| >55                      | 6            | 1.6            |
| <b>Educational level</b> |              |                |
| Ph.D. degree             | 36           | 9.4            |
| Master's degree          | 48           | 12.5           |

| Variable                                        | Valid sample | Percentage (%) |
|-------------------------------------------------|--------------|----------------|
| Bachelor's degree                               | 184          | 47.8           |
| Below bachelor's college                        | 117          | 30.3           |
| <b>Job title</b>                                |              |                |
| Senior title                                    | 83           | 21.6           |
| Middle title                                    | 146          | 37.9           |
| Junior title                                    | 156          | 40.5           |
| <b>Work years in current institution (year)</b> |              |                |
| 1-5                                             | 122          | 31.7           |
| 6-10                                            | 91           | 23.6           |
| 11-15                                           | 58           | 15.1           |
| >=16                                            | 114          | 29.6           |
| <b>Hospital level</b>                           |              |                |
| Tertiary hospital                               | 130          | 33.8           |
| Secondary hospital                              | 124          | 32.2           |
| First-tier hospital                             | 131          | 34.0           |
| <b>Work hours per week</b>                      |              |                |
| <=40                                            | 73           | 19.0           |
| 41-60                                           | 152          | 39.5           |
| >60                                             | 160          | 41.5           |
| <b>Number of outpatients serviced per day</b>   |              |                |
| <20                                             | 135          | 35.1           |
| 20-50                                           | 171          | 44.4           |
| >50                                             | 79           | 20.5           |
| <b>Self-perceived health status</b>             |              |                |
| Poor                                            | 65           | 16.9           |
| Fair                                            | 242          | 62.9           |
| Good                                            | 78           | 20.2           |

### Reliability of physician mental workload scale

Each of the six components demonstrated at least satisfactory internal consistency (higher than 0.70), with Cronbach's  $\alpha$  in the range of 0.70-0.90. The Cronbach's  $\alpha$  for the whole scale reached as high as 0.81, which indicated that the scale had excellent reliability.

### Validity of physician mental workload scale

The corrected I-CVI of each item ranged from 0.85-1 (Table 3), which was higher than 0.78. The S-CVI/Ave was 0.96, which was higher than 0.90. All of these values supported the good content validity of the scale.

The correlation matrix between items and total scores was inspected to confirm the convergent validity, which was indicated by reasonable coefficients of 0.40 and above, except for F1 and F2 (Table 3). The calculated correlation coefficients between dimensions and the total scores had a range of 0.37-0.72, showing that the dimensions and total scores had good convergent validity. Additionally, the correlation coefficients among the dimensions were lower than the correlation coefficients between the dimension-total scores, which indicated that the scale had good discriminant validity (Table 4).

Table 3 Content validity and correlation coefficient of item-total scores of the scale

| Items                             | Corrected I-CVI | Item-total correlations |
|-----------------------------------|-----------------|-------------------------|
| A1 Cognitive activity             | 1               | 0.57                    |
| A2 Emotion and feeling            | 0.85            | 0.57                    |
| A3 Overcoming difficulties        | 0.85            | 0.59                    |
| B1 Physical activity              | 1               | 0.57                    |
| B2 Intensity of physical activity | 1               | 0.65                    |
| C1 Time pressure                  | 1               | 0.69                    |
| C2 Multiple tasks                 | 0.85            | 0.69                    |
| D1 Risk concern                   | 1               | 0.64                    |
| E1 Depressed or frustrated        | 1               | 0.75                    |
| E2 Anxious or irritated           | 1               | 0.75                    |
| F1 Successful                     | 1               | 0.33*                   |
| F2 Satisfied                      | 1               | 0.31*                   |

\*Item-total scores were below 0.4.

Table 4 Correlation coefficient matrix between dimensions and total scores of the

1  
2  
3  
4 scale

| Dimensions          | A    | B    | C    | D    | E    | F    | Total scores |
|---------------------|------|------|------|------|------|------|--------------|
| A Mental demands    | 1    |      |      |      |      |      |              |
| B Physical demands  | 0.43 | 1    |      |      |      |      |              |
| C Temporal demands  | 0.52 | 0.47 | 1    |      |      |      |              |
| D Perceived risk    | 0.46 | 0.38 | 0.44 | 1    |      |      |              |
| E Frustration level | 0.40 | 0.36 | 0.54 | 0.51 | 1    |      |              |
| F Performance       | 0.09 | 0.05 | 0.01 | 0.05 | 0.13 | 1    |              |
| Total scores        | 0.61 | 0.52 | 0.68 | 0.68 | 0.72 | 0.37 | 1            |

### Exploratory factor analysis of physician mental workload scale

The KMO sample adequacy measurement was 0.81, which was higher than the recommended value of 0.70. Bartlett's test of sphericity value with the chi-square values was 1950.70 ( $p < 0.000$ ). Thus, the data were suitable for factor analysis. Considering the experts' suggestions, we selected six principal components in the EFA, and the results showed that the six-dimensional model explained 81.88% of the total variance (Table 5).

Component 1, "mental demands", was developed from 3 items that asked about feeling or memory requirements, emotional requirements, and the effort required to overcome difficulties, with a factor loading in the range of 0.74-0.81. Component 2, "frustration level", consisted of 2 items that asked about anxiety and levels of depression or frustration, and the factor loading was in the range of 0.86-0.88. Component 3, "physical demands", consisted of 2 items related to strength requirements and the intensity of work time, with a factor loading in the range of 0.84-0.90.

Component 4, “temporal demands”, constituted two items that asked about the ratio of required time to available time and the frequency of multi-tasking, with a factor loading in the range of 0.77-0.82. There were two items in “performance” component 5, which related to the sense of achievement and job satisfaction regarding work outcomes, with the factor loading in the range of 0.85-0.90. Component 6, “perceived risk”, included only 1 item that explained the perception of risk in conducting tasks (such as medical disputes and risk of being infectious), with a factor loading of 0.84.

Table 5 Factor loadings for the rotated component matrix: varimax rotated components

| Items                             | Components |      |      |      |      |      |
|-----------------------------------|------------|------|------|------|------|------|
|                                   | 1          | 2    | 3    | 4    | 5    | 6    |
| A2 Emotion and feeling            | 0.81       |      |      |      |      |      |
| A1 Cognitive activity             | 0.76       |      |      |      |      |      |
| A3 Overcoming difficulties        | 0.74       |      |      |      |      |      |
| E1 Depressed or frustrated        |            | 0.88 |      |      |      |      |
| E2 Anxious or irritated           |            | 0.86 |      |      |      |      |
| B1 Physical activity              |            |      | 0.90 |      |      |      |
| B2 Intensity of physical activity |            |      | 0.84 |      |      |      |
| C1 Time pressure                  |            |      |      | 0.82 |      |      |
| C2 Multiple tasks                 |            |      |      | 0.77 |      |      |
| F1 Successful                     |            |      |      |      | 0.90 |      |
| F2 Satisfied                      |            |      |      |      | 0.85 |      |
| D1 Risk concern                   |            |      |      |      |      | 0.84 |

### Confirmatory factor analysis of physician workload scale

The six-factor model obtained after EFA was tested by CFA using the maximum likelihood estimation method. The goodness-of-fit model was as follows:  $\chi^2/df=1.84$

1  
2  
3  
4 (<3), RMR=0.04 (<0.05), GFI=0.97 (>0.9), CFI=0.98 (>0.9), TLI=0.97 (>0.9), and  
5  
6 RMSEA=0.05 ( $\leq$ 0.05). Based on these criteria, the model was a good fit for the data.  
7  
8  
9

## 10 11 12 13 **Discussion** 14

15  
16 The purpose of this study was to develop a mental workload scale for physicians  
17 and explore its validity and reliability. The test results show that the scale is reliable  
18 and valid; hence, it is considered an effective instrument for assessing physician  
19 and valid; hence, it is considered an effective instrument for assessing physician  
20 mental workload in Chinese comprehensive public hospitals. The results show a  
21 six-dimensional model that includes aspects related to mental demands, physical  
22 demands, temporal demands, perceived risk, frustration level, and performance. In  
23 contrast to other relevant scales, this scale includes only 12 items; thus, its length is  
24 a strength because it can be completed in a short time. As for the scale's contents,  
25 the dimensions of perceived risk and temporal demands are uniquely distinctive for  
26 physician mental workload in China.  
27  
28  
29  
30  
31  
32  
33  
34  
35  
36  
37  
38  
39  
40  
41

42 The Cronbach's  $\alpha$  of the whole scale was higher than 0.7, which indicated that  
43 the scale had excellent reliability. Additionally, the corrected I-CVI was higher than  
44 0.78, and the S-CVI/Ave was more than 0.9, which showed that it had good content  
45 validity. For the construct validity, except for F1 and F2, the correlation coefficient  
46 between the item and total scores was more than 0.4, which showed that the  
47 construct validity was good. The item-total scores of the two items in the dimension  
48 of performance were near 0.4 and perhaps would have been relevant with reverse  
49  
50  
51  
52  
53  
54  
55  
56  
57  
58  
59  
60

1  
2  
3  
4 scoring. Consistent with previous research on NASA-TLX, the performance dimension  
5  
6 shows limited practical relevance since variations influence it in terms of physical  
7  
8 load.<sup>42</sup> Another study reported that subjective assessments of mental workload  
9  
10 might not provide an accurate estimation of the performance dimension.<sup>26</sup>  
11  
12 Considering this information, we retained the two items but revised their  
13  
14 description.  
15  
16  
17  
18

19 The specific dimension perceived risk, which is not included in the NASA-TLX or  
20  
21 SWAT frameworks, is highly associated with physician mental workload in China.  
22  
23 There tends to be an estranged relationship between physicians and patients, which  
24  
25 puts physicians at a dangerous risk of being assaulted by patients or visitors.<sup>43</sup>  
26  
27 According to statistics, 96% of medical staff were abused or injured in 2012.<sup>44</sup> The  
28  
29 physician-patient relationship is becoming increasingly fragile and has reached an  
30  
31 unprecedented poor level in China.<sup>45</sup> This tense relationship results in heavy  
32  
33 psychological workload during physicians' work.  
34  
35  
36  
37  
38  
39

40 Another dimension, temporal demands, is also highly specific. The gap between  
41  
42 healthcare demand and supply (and thus the doctor-patient ratio) in China has  
43  
44 caused physicians in secondary and tertiary hospital settings to become overworked.  
45  
46  
47  
48<sup>46</sup> They frequently need to work overtime and perform more than one task at the  
49  
50 same time. According to a report by the Chinese Medical Association in 2018,  
51  
52 physicians in tertiary hospitals had an average workweek of 51.05 hours, which was  
53  
54 more than the legal 40 hours per week.<sup>47</sup> Research has reported that physicians may  
55  
56 feel stressed when poor scheduling leaves them pressed for time.<sup>48</sup> Mental  
57  
58  
59  
60

1  
2  
3  
4 workload encompasses the subjective experience of a given task load.<sup>49</sup> High task  
5  
6 demands require considerable time and mental effort and represent a heavy  
7  
8 workload for physicians.<sup>50</sup> The worse physicians' experience of their task load, the  
9  
10 higher their mental workload is.<sup>51</sup>  
11  
12

13  
14 Although we have attempted an accurate examination of the measurement  
15  
16 properties of the physician mental workload scale by using qualitative and  
17  
18 quantitative methods, there are still some limitations that merit discussion. First,  
19  
20 among the six dimensions, perceived risk included only one item, which may have  
21  
22 resulted in measurement error. Second, there was a potential reporting bias in the  
23  
24 self-reported measurements of workload among physicians. Third, all respondents  
25  
26 voluntarily decided to take part in the survey. Physicians who were overburdened at  
27  
28 the time of the study may not have had time to take part in the investigation, which  
29  
30 could have resulted in selection bias. Thus, these findings reveal the need for  
31  
32 continued research to improve this scale. Burnout is also relevant to mental  
33  
34 workload and is another direction for further exploration.  
35  
36  
37  
38  
39  
40  
41  
42  
43

## 44 **Conclusion**

45  
46  
47 Creating new items from a subjective perspective is of paramount importance in  
48  
49 investigating Chinese physicians' workload. The physician mental workload scale has  
50  
51 acceptable preliminary psychometric properties, with six dimensions and twelve  
52  
53 items. The use of this scale can help us identify the main stressors in physician  
54  
55 mental workload and implement targeted optimization strategies to mitigate these  
56  
57  
58  
59  
60



1  
2  
3  
4 stressors in order to enhance the physical and mental health of physicians. Doing so  
5  
6 will consequently improve the quality and efficiency of healthcare delivery in  
7  
8 hospital settings.  
9

## 10 11 **Abbreviations**

12  
13  
14 CVI=Content Validity Index;

15  
16  
17 EFA= Confirmatory Factor Analysis; CFA= Exploratory Factor Analysis;

18  
19  
20 RMR=Root Mean Square Residual; GFI=Good-of-Fit Index; CFI=Comparative Fit Index;

21  
22  
23 TLI=Tucker-Lewis Index; CR=Critical Ratio; CV=Coefficient of Variation;

24  
25  
26 NASA-TLX=NASA Task Load Index; SWAT=Subjective Workload Assessment  
27  
28 Technique;

29  
30 **Funding Statement:** This work was supported by the National Natural Science  
31  
32 Foundation of China (grant number 71774062). The funder had no role in the study  
33  
34 design, data collection, analysis, decision to publish the manuscript, or manuscript  
35  
36 preparation.  
37  
38

39  
40 **Acknowledgment** We would like to thank all of the participants involved in this  
41  
42 research for their time and contributions.  
43  
44

45  
46 **Author Contributors:** Yinhan Hu and Qiang Fu designed the study; Chuntao Lu and  
47  
48 Jinzhu Xie performed formal analysis; Yinhan Hu obtained funding; Jinzhu Xie and  
49  
50 Lu Deng took part in the investigation; Liuming Wang, Chuntao Lu and Lu Deng were  
51  
52 involved in data cleaning; Chuntao Lu wrote the original draft; Samuel Governor,  
53  
54 Qiang Fu and Chao Li contributed to the interpretation of the results; and Chao Li  
55  
56 and Chuntao Lu performed critical revisions of the manuscript; All authors have read  
57  
58  
59  
60

1  
2  
3  
4 and approved the final manuscript.  
5

6 **Competing interests:** We have read and understood BMJ's policy on the declaration  
7  
8 of interests and declare that we have no competing interests.  
9

10  
11 **Patient consent:** Not required.  
12

13  
14 **Ethics approval:** The Ethics Committee of Tongji Medical College, Huazhong  
15  
16 University of Science and Technology (IORG No. IORG0003571), gave the final  
17  
18 approval for the study.  
19

20  
21 **Data sharing:** The datasets used and/or analysed during the current study are  
22  
23 available from the corresponding author on reasonable request.  
24  
25  
26  
27  
28  
29

## 30 31 Reference

- 32  
33  
34 1. Györfy Z, Dweik D, Girasek E. Workload, mental health and burnout indicators  
35 among female physicians[J]. *Hum resour health*, 2016, 14: 12.  
36  
37 2. Lu L, Gao M, Yang T, et al. The updated Physician's Pledge and Chinese junior  
38 physicians. *The Lancet*. 2018;391:305.  
39  
40 3. Karahan A, Kav S, Abbasoglu A, et al. Low back pain: prevalence and associated  
41 risk factors among hospital staff. *J Adv Nurs*. 2009;65: 516-524.  
42  
43 4. Smith-Miller CA, Shaw-Kokot J, Curro B, et al. An integrative review: fatigue among  
44 nurses in acute care settings. *J Nurs Adm*. 2014;44:487-494.  
45  
46 5. Arvidsson I, Simonsen JG, Balogh I. Discrepancies in pain presentation caused by  
47 adverse psychosocial conditions as compared to pain due to high physical  
48 workload? *Work*. 2012;41:2472-2475.  
49  
50 6. Manty M, Moller A, Nilsson C, et al. Association of physical workload and leisure  
51 time physical activity with incident mobility limitations: a follow-up study.  
52  
53  
54  
55  
56  
57  
58  
59  
60 *Occup Environ Med*. 2014; 71:543-548.

- 1  
2  
3  
4 7. Ridley C. Relating nursing workload to quality of care in child and adolescent  
5 mental health inpatient services. *Int J Health Care Qual Assur.*2007;20:429-440.
- 6  
7  
8 8. Michtalik HJ, Pronovost PJ, Marsteller JA, et al. Identifying potential predictors of a  
9 safe attending physician workload: a survey of hospitalists. *J Hosp Med.*2013;  
10 8:644-646.
- 11  
12  
13 9. Michtalik HJ, Yeh HC, Pronovost PJ, et al. Impact of attending physician workload  
14 on patient care a survey of hospitalists. *JAMA Intern Med.*2013; 173:375-377.
- 15  
16  
17 10. Garcia-Lacalle J. Balancing physician workload and patient satisfaction: a  
18 dilemma for hospital managers. *Public Money &*  
19 *Management.*2010;30:183-188.
- 20  
21  
22  
23 11. Steyrer J, Schiffinger M, Huber C, et al. Attitude is everything? The impact of  
24 workload, safety climate, and safety tools on medical errors: a study of  
25 intensive care units. *Health Care Manage R.*2013;38:306-316.
- 26  
27  
28  
29 12. Pedroja AT, Blegen MA, Abravanel R. The relationship between hospital systems  
30 load and patient harm. *J Patient Saf.* 2014;10:168-175.
- 31  
32  
33 13. Williams E S, Rondeau K V, Xiao Q, et al. Heavy physician workloads: impact on  
34 physician attitudes and outcomes. *Health Care Manage R*, 2007, 20: 261-269.
- 35  
36  
37 14. Hart SG. Theory and Measurement of Human Workload. *J Oper Res*  
38 *Soc.*1988;39:725-734.
- 39  
40  
41 15. Cain B. A review of the mental workload literature. Toronto: Defence Research  
42 And Development, 2007.
- 43  
44  
45 16. Lysaght RJ, Hill SG, Dick AO, et al. Operator workload: Comprehensive review and  
46 evaluation of operator workload methodologies. Analytics inc willow grove pa,  
47 1989.
- 48  
49  
50 17 Theorell T, Hammarström A, Aronsson G, et al. A systematic review including  
51 meta-analysis of work environment and depressive symptoms[J]. *BMC public*  
52 *health*, 2015, 15(1): 738.
- 53  
54  
55 18 Noseworthy J, Madara J, Cosgrove D, et al. Physician burnout is a public health  
56 crisis: a message to our fellow health care CEOs[J]. *Health Affairs Blog*, 2017.
- 57  
58  
59 19 Olson K, Sinsky C, Rinne S T, et al. Cross-sectional survey of workplace stressors  
60

- 1  
2  
3  
4 associated with physician burnout measured by the Mini-Z and the Maslach  
5 Burnout Inventory[J]. *Stress and Health*, 2019, 35(2): 157-175.
- 6  
7  
8 20. Weigl M, Müller A, Holland S, et al. Work conditions, mental workload and  
9 patient care quality: a multisource study in the emergency department. *BMJ*  
10 *Qual Saf*. 2016; 25: 499-508.
- 11  
12  
13 21. European Commission. European Pact for health and mental health.  
14 [http://ec.europa.eu/health/mental\\_health/policy\\_es](http://ec.europa.eu/health/mental_health/policy_es). (Accessed on 24th Sep  
15 2018)
- 16  
17  
18 22. Bertram DA, Opila DA, Brown JL, et al. Measuring physician mental workload:  
19 reliability and validity assessment of a brief instrument. *Med Care*.1992;30:  
20 95-104.
- 21  
22  
23 23. Hart SG, Staveland LE. Development of NASA-TLX (Task Load Index): Results of  
24 empirical and theoretical research. *Adv Psychol*. 1998;52:139-183.
- 25  
26  
27 24. Rubio S, Díaz E, Martín J, et al. Evaluation of subjective mental workload: A  
28 comparison of SWAT, NASA-TLX, and workload profile methods. *Appl Psychol*.  
29 2004; 53: 61-86.
- 30  
31  
32 25. Hill SG, Iavecchia HP, Byers JC. Comparison of four subjective workload rating  
33 scales. *Hum Factors*.1992;34:429.
- 34  
35  
36 26. Rubio-Valdehita S, Lopez-Nunez MI, Lopez-Higes R, et al. Development of the  
37 CarMen-Q Questionnaire for mental workload assessment. *Psicothema*. 2017;  
38 29:570-576.
- 39  
40  
41 27. Colligan L, Potts HW, Finn CT, et al. Cognitive workload changes for nurses  
42 transitioning from a legacy system with paper documentation to a commercial  
43 electronic health record. *Int J Med Inform*.2015; 84:469-476.
- 44  
45  
46 28. Hoonakker P, Carayon P, Gurses A, et al. Measuring Workload Of ICU Nurses with  
47 a Questionnaire Survey: The NASA Task Load Index (TLX). *IIE Trans Healthc Syst*  
48 *Eng*. 2011;1:131-143.
- 49  
50  
51 29. Malekpour F, Malekpour A R, Mohammadian Y, et al. Assessment of mental  
52 workload in nursing by using NASA-TLX. *The Journal of Urmia Nursing and*  
53 *Midwifery Faculty*.2014; 11: 892-899.
- 54  
55  
56  
57  
58  
59  
60

- 1
- 2
- 3
- 4 30. Reid GB, Nygren TE. The Subjective Workload Assessment Technique: A Scaling
- 5 Procedure for Measuring Mental Workload. *Adv Psychol.*1988; 52.
- 6
- 7 31. The COPSQ III questionnaire. [https://www.copsoq-network.org/assets/Uplo](https://www.copsoq-network.org/assets/Uploads/annex1-Dimensions-and-items-in-the-COPSQ-III-questionnaire-060718.pdf)
- 8 [ads/annex1-Dimensions-and-items-in-the-COPSQ-III-questionnaire-060718.pdf](https://www.copsoq-network.org/assets/Uploads/annex1-Dimensions-and-items-in-the-COPSQ-III-questionnaire-060718.pdf)
- 9 f (Accessed on 14<sup>th</sup> June 2019)
- 10
- 11
- 12
- 13 32. Zhou H, Han X, Zhang J, et al. Job satisfaction and associated factors among
- 14 medical staff in tertiary public hospitals: Results from a national cross-sectional
- 15 survey in China. *Int J Occup Env Heal.* 2018; 15: 1528.
- 16
- 17 33. Sun J, Ma J, Hu G, et al. Welfare, wellness, and job satisfaction of Chinese
- 18 physicians: A national survey of public tertiary hospitals in China. *Int J Health*
- 19 *Plan M.* 2017; 32: 270-284.
- 20
- 21
- 22
- 23 34. The Lancet, Ending violence against doctors in China. *The Lancet.* 2012; 379:1764.
- 24
- 25 35. Chinese Hospital Association. Chinese patient safety goal 2014-2015.
- 26 <http://www.cha.org.cn/plus/view.php?aid=14626> (Accessed on 24<sup>th</sup> Sep 2018)
- 27
- 28
- 29 36. Power M, Quinn K, Schmidt S, et al. Development of the WHOQOL-old module.
- 30 *Qual Life Res.* 2005; 14 (10):2197-2214.
- 31
- 32
- 33 37. Kline RB. Principles and practice of structural equation modeling. 3rd ed. New
- 34 York: Guilford publications, 2015:69-70.
- 35
- 36 38. Ford JK, MacCullum RC, Tait M. The application of exploratory factor analysis in
- 37 applied psychology: A critical review and analysis. *Pers Psychol.* 1986;
- 38 39:291-314.
- 39
- 40 39. Lynn MR. Determination and quantification of content validity. *Nursing Res.* 1986;
- 41 35:382-385.
- 42
- 43 40. Dilorio C K. Measurement in health behavior: methods for research and
- 44 evaluation. John Wiley & Sons, 2006.
- 45
- 46 41. Tabachnick B, Fidell LS. Using Multivariate Statistics. 6<sup>th</sup> ed., Pearson, Boston,
- 47 2013: 720-726.
- 48
- 49 42. DiDomenico A, Nussbaum MA. Effects of different physical workload parameters
- 50 on mental workload and performance. *Int J Ind Ergonom* 2011. 41;255-260.
- 51
- 52 43. Tang L, Guan M. Rise of Health Consumerism in China and Its Effects on
- 53
- 54
- 55
- 56
- 57
- 58
- 59
- 60

- 1  
2  
3  
4 Physicians' Professional Identity and the Physician-Patient Relationship and  
5  
6 Communication. *Health commun.* 2018; 33:636-642.
- 7  
8 44. Yueju L. Violence against doctors in China. *The Lancet.* 2014; 384:745.
- 9  
10 45. Sun T, Gao L, Shi Y. Workplace violence, psychological stress, sleep quality and  
11  
12 subjective health in Chinese doctors: a large cross-sectional study. *BMJ OPEN.*  
13  
14 2017;1-8.
- 15  
16 46. Wen J, Cheng Y, Hu X. Workload, burnout, and medical mistakes among  
17  
18 physicians in China: A cross-sectional study. *Biosci trends.* 2016; 10:27-33.
- 19  
20 47. Chinese Medical Doctor Association. White Paper on the Practice of Medi  
21  
22 cine by Chinese Physicians. [http://www.cmda.net/u/cms/www/201807/0618](http://www.cmda.net/u/cms/www/201807/06181247ffex.pdf)  
23  
24 [1247ffex.pdf](http://www.cmda.net/u/cms/www/201807/06181247ffex.pdf). (Accessed on 14<sup>th</sup> June 2019)
- 25  
26 48. Horner RD, Szaflarsk JP, Ying J. Physician Work Intensity Among Medical  
27  
28 Specialties: Emerging Evidence on its Magnitude and Composition. *Med Care.*  
29  
30 2011; 49:1007-1011.
- 31  
32 49. Charles RL, Nixon J. Measuring mental workload using physiological measures: A  
33  
34 systematic review[J]. *Appl ergon.* 2019; 74: 221-232.
- 35  
36 50. Mosaly PR, Mazur LM, Yu F. Relating Task Demand, Mental Effort and Task  
37  
38 Difficulty with Physicians' Performance during Interactions with Electronic  
39  
40 Health Records (EHRs). *Int J Hum-Comput Int.* 2017; 34:467-475.
- 41  
42 51. Colle HA, Reid GB. Context effects in subjective mental workload ratings. *Hum*  
43  
44 *factors.* 1998; 40: 591-600.
- 45  
46  
47  
48  
49  
50  
51  
52  
53  
54  
55  
56  
57  
58  
59  
60

# Reporting checklist for cross sectional study.

Based on the STROBE cross sectional guidelines.

## Instructions to authors

Complete this checklist by entering the page numbers from your manuscript where readers will find each of the items listed below.

Your article may not currently address all the items on the checklist. Please modify your text to include the missing information. If you are certain that an item does not apply, please write "n/a" and provide a short explanation.

Upload your completed checklist as an extra file when you submit to a journal.

In your methods section, say that you used the STROBE cross sectional reporting guidelines, and cite them as:

von Elm E, Altman DG, Egger M, Pocock SJ, Gøtzsche PC, Vandenbroucke JP. The Strengthening the Reporting of Observational Studies in Epidemiology (STROBE) Statement: guidelines for reporting observational studies.

|                           |                     | Reporting Item                                                                                  | Page Number |
|---------------------------|---------------------|-------------------------------------------------------------------------------------------------|-------------|
| <b>Title and abstract</b> |                     |                                                                                                 |             |
| Title                     | <a href="#">#1a</a> | Indicate the study's design with a commonly used term in the title or the abstract              | 1           |
| Abstract                  | <a href="#">#1b</a> | Provide in the abstract an informative and balanced summary of what was done and what was found | 2           |
| <b>Introduction</b>       |                     |                                                                                                 |             |
| Background / rationale    | <a href="#">#2</a>  | Explain the scientific background and rationale for the investigation being reported            | 3-4         |
| Objectives                | <a href="#">#3</a>  | State specific objectives, including any prespecified hypotheses                                | 5           |
| <b>Methods</b>            |                     |                                                                                                 |             |

|    |                      |                      |                                                                   |      |
|----|----------------------|----------------------|-------------------------------------------------------------------|------|
| 1  | Study design         | <a href="#">#4</a>   | Present key elements of study design early in the paper           | 5    |
| 2  |                      |                      |                                                                   |      |
| 3  | Setting              | <a href="#">#5</a>   | Describe the setting, locations, and relevant dates, including    | 6-7  |
| 4  |                      |                      | periods of recruitment, exposure, follow-up, and data collection  |      |
| 5  |                      |                      |                                                                   |      |
| 6  |                      |                      |                                                                   |      |
| 7  | Eligibility criteria | <a href="#">#6a</a>  | Give the eligibility criteria, and the sources and methods of     | 7    |
| 8  |                      |                      | selection of participants.                                        |      |
| 9  |                      |                      |                                                                   |      |
| 10 |                      |                      |                                                                   |      |
| 11 |                      | <a href="#">#7</a>   | Clearly define all outcomes, exposures, predictors, potential     | 9-10 |
| 12 |                      |                      | confounders, and effect modifiers. Give diagnostic criteria, if   |      |
| 13 |                      |                      | applicable                                                        |      |
| 14 |                      |                      |                                                                   |      |
| 15 |                      |                      |                                                                   |      |
| 16 | Data sources /       | <a href="#">#8</a>   | For each variable of interest give sources of data and details of | n/a  |
| 17 | measurement          |                      | methods of assessment (measurement). Describe                     |      |
| 18 |                      |                      | comparability of assessment methods if there is more than one     |      |
| 19 |                      |                      | group. Give information separately for for exposed and            |      |
| 20 |                      |                      | unexposed groups if applicable.                                   |      |
| 21 |                      |                      |                                                                   |      |
| 22 |                      |                      |                                                                   |      |
| 23 |                      |                      |                                                                   |      |
| 24 | Bias                 | <a href="#">#9</a>   | Describe any efforts to address potential sources of bias         | 17   |
| 25 |                      |                      |                                                                   |      |
| 26 |                      |                      |                                                                   |      |
| 27 | Study size           | <a href="#">#10</a>  | Explain how the study size was arrived at                         | 7    |
| 28 |                      |                      |                                                                   |      |
| 29 | Quantitative         | <a href="#">#11</a>  | Explain how quantitative variables were handled in the            | n/a  |
| 30 | variables            |                      | analyses. If applicable, describe which groupings were chosen,    |      |
| 31 |                      |                      | and why                                                           |      |
| 32 |                      |                      |                                                                   |      |
| 33 |                      |                      |                                                                   |      |
| 34 | Statistical          | <a href="#">#12a</a> | Describe all statistical methods, including those used to control | 9-10 |
| 35 | methods              |                      | for confounding                                                   |      |
| 36 |                      |                      |                                                                   |      |
| 37 |                      |                      |                                                                   |      |
| 38 | Statistical          | <a href="#">#12b</a> | Describe any methods used to examine subgroups and                | n/a  |
| 39 | methods              |                      | interactions                                                      |      |
| 40 |                      |                      |                                                                   |      |
| 41 |                      |                      |                                                                   |      |
| 42 | Statistical          | <a href="#">#12c</a> | Explain how missing data were addressed                           | 7    |
| 43 | methods              |                      |                                                                   |      |
| 44 |                      |                      |                                                                   |      |
| 45 |                      |                      |                                                                   |      |
| 46 | Statistical          | <a href="#">#12d</a> | If applicable, describe analytical methods taking account of      | 9-10 |
| 47 | methods              |                      | sampling strategy                                                 |      |
| 48 |                      |                      |                                                                   |      |
| 49 |                      |                      |                                                                   |      |
| 50 | Statistical          | <a href="#">#12e</a> | Describe any sensitivity analyses                                 | n/a  |
| 51 | methods              |                      |                                                                   |      |
| 52 |                      |                      |                                                                   |      |
| 53 |                      |                      |                                                                   |      |
| 54 | <b>Results</b>       |                      |                                                                   |      |
| 55 |                      |                      |                                                                   |      |
| 56 | Participants         | <a href="#">#13a</a> | Report numbers of individuals at each stage of study—eg           | 6-7  |
| 57 |                      |                      | numbers potentially eligible, examined for eligibility, confirmed |      |
| 58 |                      |                      |                                                                   |      |
| 59 |                      |                      |                                                                   |      |
| 60 |                      |                      |                                                                   |      |



eligible, included in the study, completing follow-up, and analysed. Give information separately for for exposed and unexposed groups if applicable.

|    |                   |                      |                                                                                                                                                                                                                   |       |
|----|-------------------|----------------------|-------------------------------------------------------------------------------------------------------------------------------------------------------------------------------------------------------------------|-------|
| 1  |                   |                      |                                                                                                                                                                                                                   |       |
| 2  |                   |                      |                                                                                                                                                                                                                   |       |
| 3  |                   |                      |                                                                                                                                                                                                                   |       |
| 4  |                   |                      |                                                                                                                                                                                                                   |       |
| 5  | Participants      | <a href="#">#13b</a> | Give reasons for non-participation at each stage                                                                                                                                                                  | n/a   |
| 6  |                   |                      |                                                                                                                                                                                                                   |       |
| 7  | Participants      | <a href="#">#13c</a> | Consider use of a flow diagram                                                                                                                                                                                    | n/a   |
| 8  |                   |                      |                                                                                                                                                                                                                   |       |
| 9  |                   |                      |                                                                                                                                                                                                                   |       |
| 10 | Descriptive data  | <a href="#">#14a</a> | Give characteristics of study participants (eg demographic, clinical, social) and information on exposures and potential confounders. Give information separately for exposed and unexposed groups if applicable. | 11    |
| 11 |                   |                      |                                                                                                                                                                                                                   |       |
| 12 |                   |                      |                                                                                                                                                                                                                   |       |
| 13 |                   |                      |                                                                                                                                                                                                                   |       |
| 14 |                   |                      |                                                                                                                                                                                                                   |       |
| 15 |                   |                      |                                                                                                                                                                                                                   |       |
| 16 |                   |                      |                                                                                                                                                                                                                   |       |
| 17 | Descriptive data  | <a href="#">#14b</a> | Indicate number of participants with missing data for each variable of interest                                                                                                                                   | 7     |
| 18 |                   |                      |                                                                                                                                                                                                                   |       |
| 19 |                   |                      |                                                                                                                                                                                                                   |       |
| 20 |                   |                      |                                                                                                                                                                                                                   |       |
| 21 | Outcome data      | <a href="#">#15</a>  | Report numbers of outcome events or summary measures. Give information separately for exposed and unexposed groups if applicable.                                                                                 | 12-15 |
| 22 |                   |                      |                                                                                                                                                                                                                   |       |
| 23 |                   |                      |                                                                                                                                                                                                                   |       |
| 24 |                   |                      |                                                                                                                                                                                                                   |       |
| 25 |                   |                      |                                                                                                                                                                                                                   |       |
| 26 | Main results      | <a href="#">#16a</a> | Give unadjusted estimates and, if applicable, confounder-adjusted estimates and their precision (eg, 95% confidence interval). Make clear which confounders were adjusted for and why they were included          | n/a   |
| 27 |                   |                      |                                                                                                                                                                                                                   |       |
| 28 |                   |                      |                                                                                                                                                                                                                   |       |
| 29 |                   |                      |                                                                                                                                                                                                                   |       |
| 30 |                   |                      |                                                                                                                                                                                                                   |       |
| 31 |                   |                      |                                                                                                                                                                                                                   |       |
| 32 |                   |                      |                                                                                                                                                                                                                   |       |
| 33 | Main results      | <a href="#">#16b</a> | Report category boundaries when continuous variables were categorized                                                                                                                                             | n/a   |
| 34 |                   |                      |                                                                                                                                                                                                                   |       |
| 35 |                   |                      |                                                                                                                                                                                                                   |       |
| 36 |                   |                      |                                                                                                                                                                                                                   |       |
| 37 | Main results      | <a href="#">#16c</a> | If relevant, consider translating estimates of relative risk into absolute risk for a meaningful time period                                                                                                      | n/a   |
| 38 |                   |                      |                                                                                                                                                                                                                   |       |
| 39 |                   |                      |                                                                                                                                                                                                                   |       |
| 40 |                   |                      |                                                                                                                                                                                                                   |       |
| 41 | Other analyses    | <a href="#">#17</a>  | Report other analyses done—e.g., analyses of subgroups and interactions, and sensitivity analyses                                                                                                                 | n/a   |
| 42 |                   |                      |                                                                                                                                                                                                                   |       |
| 43 |                   |                      |                                                                                                                                                                                                                   |       |
| 44 | <b>Discussion</b> |                      |                                                                                                                                                                                                                   |       |
| 45 |                   |                      |                                                                                                                                                                                                                   |       |
| 46 | Key results       | <a href="#">#18</a>  | Summarise key results with reference to study objectives                                                                                                                                                          | 15-16 |
| 47 |                   |                      |                                                                                                                                                                                                                   |       |
| 48 |                   |                      |                                                                                                                                                                                                                   |       |
| 49 | Limitations       | <a href="#">#19</a>  | Discuss limitations of the study, taking into account sources of potential bias or imprecision. Discuss both direction and magnitude of any potential bias.                                                       | 17-18 |
| 50 |                   |                      |                                                                                                                                                                                                                   |       |
| 51 |                   |                      |                                                                                                                                                                                                                   |       |
| 52 |                   |                      |                                                                                                                                                                                                                   |       |
| 53 |                   |                      |                                                                                                                                                                                                                   |       |
| 54 | Interpretation    | <a href="#">#20</a>  | Give a cautious overall interpretation considering objectives, limitations, multiplicity of analyses, results from similar studies, and other relevant evidence.                                                  | 17    |
| 55 |                   |                      |                                                                                                                                                                                                                   |       |
| 56 |                   |                      |                                                                                                                                                                                                                   |       |
| 57 |                   |                      |                                                                                                                                                                                                                   |       |
| 58 |                   |                      |                                                                                                                                                                                                                   |       |
| 59 |                   |                      |                                                                                                                                                                                                                   |       |
| 60 |                   |                      |                                                                                                                                                                                                                   |       |

1 Generalisability [#21](#) Discuss the generalisability (external validity) of the study 18  
2 results  
3

4  
5 **Other**  
6 **Information**  
7

8  
9 Funding [#22](#) Give the source of funding and the role of the funders for the 19  
10 present study and, if applicable, for the original study on which  
11 the present article is based  
12

13  
14 None The STROBE checklist is distributed under the terms of the Creative Commons Attribution  
15 License CC-BY. This checklist can be completed online using <https://www.goodreports.org/>, a tool  
16 made by the [EQUATOR Network](#) in collaboration with [Penelope.ai](#)  
17  
18  
19  
20  
21  
22  
23  
24  
25  
26  
27  
28  
29  
30  
31  
32  
33  
34  
35  
36  
37  
38  
39  
40  
41  
42  
43  
44  
45  
46  
47  
48  
49  
50  
51  
52  
53  
54  
55  
56  
57  
58  
59  
60
